# Supplementary material for: A case of chain propagation: α-aminoalkyl radicals as initiators for aryl radical chemistry
Source: PubMed Central journal article supplement — Chem Sci. 2020 Oct 20;11(47):12822–8. doi: 10.1039/d0sc04387g (PMC8163300; doi:10.1039/d0sc04387g), 2020-10-20
Supplement: SC-011-D0SC04387G-s001.pdf [file SC-011-D0SC04387G-s001.pdf]

## A Case of Radical Chain Propagation: $\alpha$ -Aminoalkyl Radicals as Initiators for Aryl Radical Chemistry

Timothée Constantin<sup>a</sup>, Fabio Juliá<sup>a</sup>, Nadeem S. Sheikh and Daniele Leonori<sup>a\*</sup>

<sup>a</sup> Department of Chemistry, University of Manchester, Manchester M13 9PL, UK

<sup>b</sup> Department of Chemistry, College of Science, King Faisal University, P. O. Box 400, Al-Ahsa 31982, Saudi Arabia

\* [daniele.leonori@manchester.ac.uk](mailto:daniele.leonori@manchester.ac.uk)

### Table of Contents

|                                                           |                                                                                                                                   |           |
|-----------------------------------------------------------|-----------------------------------------------------------------------------------------------------------------------------------|-----------|
| <b>1</b>                                                  | <b>General Experimental Details</b> .....                                                                                         | <b>3</b>  |
| <b>2</b>                                                  | <b>Pictures of Reaction Set-Up</b> .....                                                                                          | <b>4</b>  |
| <b>3</b>                                                  | <b>Studies on the Arylation of <i>N</i>-Methylpyrrole with <i>p</i>-Acetyl-iodobenzene and <i>p</i>-Methoxy-iodobenzene</b> ..... | <b>5</b>  |
| <b>3.1</b>                                                | <b>Screening of Reaction Parameters</b> .....                                                                                     | <b>5</b>  |
| <b>3.2</b>                                                | <b>Control Experiments</b> .....                                                                                                  | <b>6</b>  |
| <b>3.3</b>                                                | <b>EDA Complex Formation</b> .....                                                                                                | <b>7</b>  |
| UV/Vis Absorption Spectroscopy Studies .....              |                                                                                                                                   | 9         |
| EDA-Based Arylation of Pyrrole Using Catalytic Amine..... |                                                                                                                                   | 10        |
| <b>3.4</b>                                                | <b>Emission Quenching (Stern-Volmer) Studies</b> .....                                                                            | <b>12</b> |
| <b>3.5</b>                                                | <b>Experiments with Sub-stoichiometric Amounts of <i>n</i>-Bu<sub>3</sub>N</b> .....                                              | <b>13</b> |
| <b>3.6</b>                                                | <b>Evaluating the Presence of Photoactive Poly-pyrroles</b> .....                                                                 | <b>14</b> |
| <b>4</b>                                                  | <b>Substrate Scope for the Radical C–H Arylation</b> .....                                                                        | <b>16</b> |
| <b>5</b>                                                  | <b>Substrate Scope for the Radical Phosphonylation</b> .....                                                                      | <b>26</b> |
| <b>6</b>                                                  | <b>Cyclic Voltammetry</b> .....                                                                                                   | <b>29</b> |
| <b>6.1</b>                                                | <b>General Experimental Details</b> .....                                                                                         | <b>29</b> |
| <b>6.2</b>                                                | <b>Redox Potentials</b> .....                                                                                                     | <b>29</b> |
| <b>6.3</b>                                                | <b>Cyclic Voltammograms</b> .....                                                                                                 | <b>30</b> |
| <b>7</b>                                                  | <b>Quantum Yield Determination</b> .....                                                                                          | <b>32</b> |
| <b>7.1</b>                                                | <b>General Experimental Details</b> .....                                                                                         | <b>32</b> |
| <b>7.2</b>                                                | <b>Quantum Yield Determination</b> .....                                                                                          | <b>32</b> |
| Intermittent Irradiation Experiments.....                 |                                                                                                                                   | 32        |
| <b>8</b>                                                  | <b>Comparison of XAT Reactions Energy Profiles</b> .....                                                                          | <b>34</b> |
| <b>9</b>                                                  | <b>Computational Studies</b> .....                                                                                                | <b>35</b> |

|            |                                                             |           |
|------------|-------------------------------------------------------------|-----------|
| <b>9.1</b> | <b>Computational Methods .....</b>                          | <b>35</b> |
| <b>9.2</b> | <b>Electronic Properties of Radicals.....</b>               | <b>36</b> |
| <b>9.3</b> | <b>Reaction Energies (<math>\Delta G^\circ</math>).....</b> | <b>43</b> |
| <b>10</b>  | <b>References .....</b>                                     | <b>56</b> |

## 1 General Experimental Details

All required fine chemicals were used directly without purification unless stated otherwise. *N*-Methylpyrrole was distilled from KOH under reduced pressure, degassed by bubbling nitrogen and stored in the dark at 4°C. All air and moisture sensitive reactions were carried out under nitrogen atmosphere using standard Schlenk manifold technique. All solvents were bought from Acros as 99.8% purity. <sup>1</sup>H and <sup>13</sup>C Nuclear Magnetic Resonance (NMR) spectra were acquired at various field strengths as indicated and were referenced to CHCl<sub>3</sub> (7.27 and 77.0 ppm for <sup>1</sup>H and <sup>13</sup>C respectively). <sup>1</sup>H NMR coupling constants are reported in Hertz and refer to apparent multiplicities and not true coupling constants. Data are reported as follows: chemical shift, integration, multiplicity (s = singlet, br s = broad singlet, d = doublet, t = triplet, q = quartet, qi = quintet, sx = sextet, sp = septet, m = multiplet, dd = doublet of doublets, etc.), proton assignment (determined by 2D NMR experiments: COSY, HSQC and HMBC) where possible. High-resolution mass spectra were obtained using a JEOL JMS-700 spectrometer or a Fissions VG Trio 2000 quadrupole mass spectrometer. Spectra were obtained using electron impact ionization (EI) and chemical ionization (CI) techniques, or positive electrospray (ES). Analytical TLC: aluminum backed plates pre-coated (0.25 mm) with Merck Silica Gel 60 F254. Compounds were visualized by exposure to UV-light or by dipping the plates in permanganate (KMnO<sub>4</sub>) stain followed by heating. Flash column chromatography was performed using Merck Silica Gel 60 (40–63 μm). All mixed solvent eluents are reported as v/v solutions. Absorption and emission spectra were obtained using an Horiba Duetta spectrometer and 1 mm High Precision Cell made of quartz from Hellma Analytics. The LEDs used are Kessil PR 160 440 nm. All the reactions were conducted in CEM 10 mL glass microwave tubes.

## 2 Pictures of Reaction Set-Up

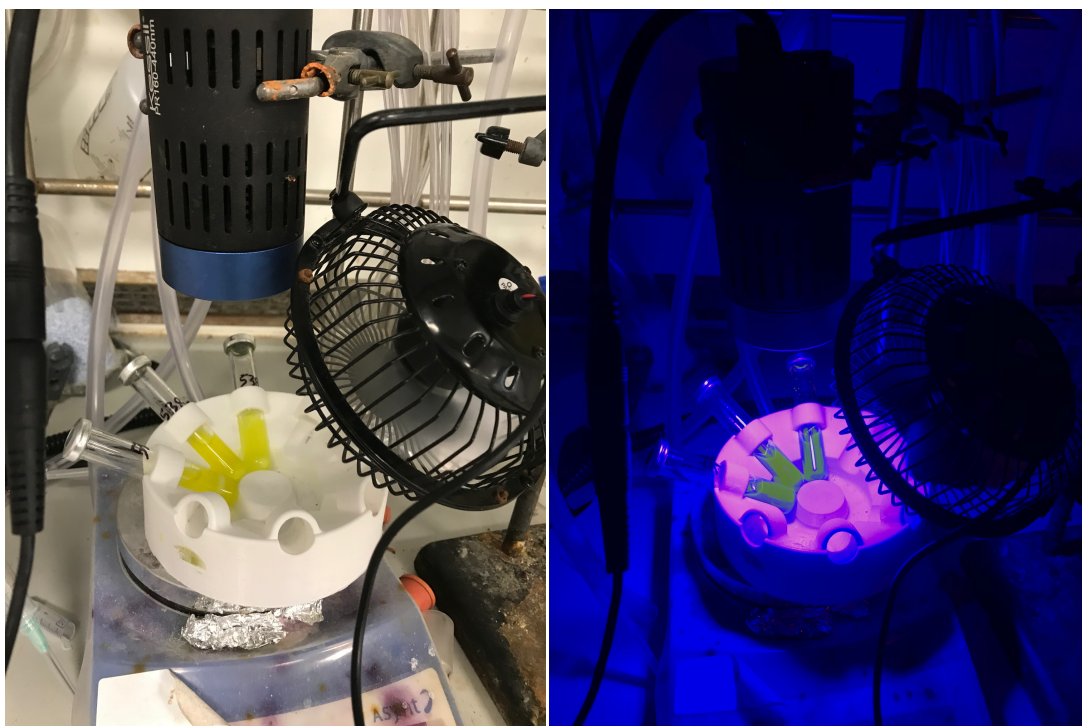

Figure S1.



### 3 Studies on the Arylation of *N*-Methylpyrrole with *p*-Acetyl-iodobenzene and *p*-Methoxy-iodobenzene

#### 3.1 Screening of Reaction Parameters

##### General Procedure for the Arylation – GP1

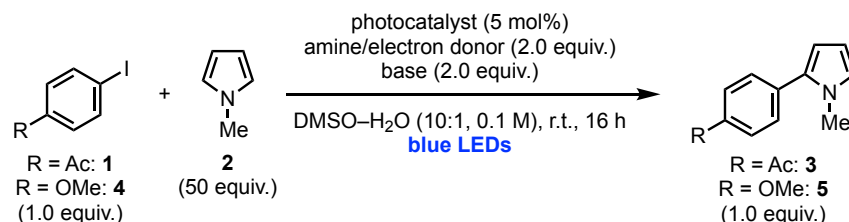

A dry tube equipped with a stirring bar was charged with the aryl iodide (0.10 mmol, 1.0 equiv.), 4CzIPN (4 mg, 5  $\mu$ mol, 5 mol%), the amine/electron donor (if solid) (0.20 mmol, 2.0 equiv.) and the base (if solid) (0.20 mmol, 2.0 equiv.). The tube was capped with a Supelco aluminium crimp seal with septum (PTFE/butyl), evacuated and refilled with N<sub>2</sub> (x 3). Degassed DMSO–H<sub>2</sub>O (10:1) (1.0 mL, 0.1 M), the amine/electron donor (if liquid) (0.20 mmol, 2.0 equiv.), the base (if liquid) (0.20 mmol, 2.0 equiv.) and 2 (440  $\mu$ L, 5.0 mmol, 50.0 equiv.) were sequentially added. The blue LEDs were turned on and the mixture was stirred under irradiation for 16 h at room temperature. 1,3-dinitrobenzene (8.4 mg, 0.05 mmol, 0.5 equiv.) was added as the internal standard. Brine (5 mL) and EtOAc (5 mL) were added and the mixture was shaken vigorously. The layers were separated and the aqueous layer was extracted with EtOAc (10 mL x 2). The combined organic layers were dried (MgSO<sub>4</sub>), filtered and evaporated. The crude was solubilised in CDCl<sub>3</sub> (0.6 mL) and analysed by <sup>1</sup>H NMR spectroscopy to determine the <sup>1</sup>H NMR yield.

The results are detailed in Scheme 2D of the article.

### 3.2 Control Experiments

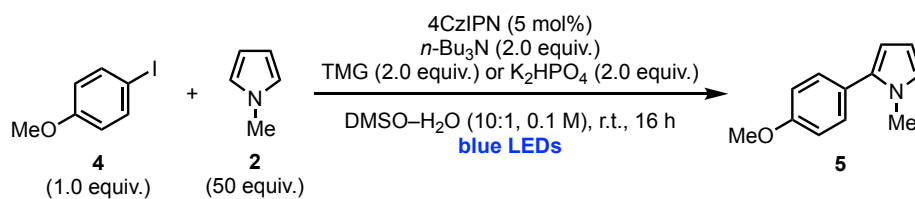

These experiments were performed according to GP1.

**Table S1.**

| Entry    | Variations                     | Base                            | Yield (%) |
|----------|--------------------------------|---------------------------------|-----------|
| <b>1</b> | none                           | TMG                             | 64        |
| <b>2</b> | no light                       |                                 | –         |
| <b>3</b> | no 4CzIPN                      |                                 | –         |
| <b>4</b> | no <i>n</i> -Bu <sub>3</sub> N |                                 | 24        |
| <b>5</b> | none                           | K <sub>2</sub> HPO <sub>4</sub> | 58        |
| <b>6</b> | no light                       |                                 | –         |
| <b>7</b> | no 4CzIPN                      |                                 | –         |
| <b>8</b> | no <i>n</i> -Bu <sub>3</sub> N |                                 | –         |

Control experiments confirm that light and photocatalyst are crucial components of the reaction. However, in the absence of *n*-Bu<sub>3</sub>N (entry 4), 24% of **5** was observed. We have rationalised this outcome on the basis that TMG can potentially generate  $\alpha$ -aminoalkyl radicals and therefore initiate the reactivity. Indeed, when the base was changed for K<sub>2</sub>HPO<sub>4</sub>, no product was formed in the absence of *n*-Bu<sub>3</sub>N (entry 8).

### 3.3 EDA Complex Formation

Electron poor arenes are known to form electron donor-acceptor (EDA) complexes with electron rich partners<sup>1,2</sup> which undergo SET upon irradiation at the charge-transfer  $\lambda_{\max}$ . We therefore considered that, in the case of electron poor aryl iodides, the alkylamine could be involved in an additional productive reactivity pathway initiated by the formation and the following SET of an EDA complex.

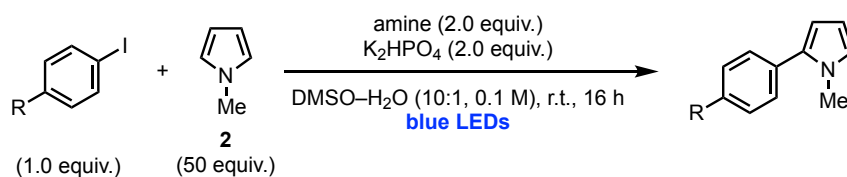

These experiments were performed according to **GPI** but without the addition of 4CzIPN.

Table S2.

| Entry | R   | amine                        | Yield (%) |
|-------|-----|------------------------------|-----------|
| 1     | Ac  | TMG                          | 15        |
| 2     |     | <i>n</i> -Bu <sub>3</sub> N  | 73        |
| 3     |     | <i>i</i> -Pr <sub>2</sub> NH | 56        |
| 4     |     | Ph <sub>2</sub> NPMP         | 83        |
| 5     | CN  | TMG                          | 6         |
| 6     |     | <i>n</i> -Bu <sub>3</sub> N  | 6         |
| 7     |     | <i>i</i> -Pr <sub>2</sub> NH | 27        |
| 8     |     | Ph <sub>2</sub> NPMP         | 81        |
| 9     | H   | TMG                          | –         |
| 10    |     | <i>n</i> -Bu <sub>3</sub> N  | –         |
| 11    |     | <i>i</i> -Pr <sub>2</sub> NH | –         |
| 12    |     | Ph <sub>2</sub> NPMP         | –         |
| 13    | OMe | TMG                          | –         |
| 14    |     | <i>n</i> -Bu <sub>3</sub> N  | –         |
| 15    |     | <i>i</i> -Pr <sub>2</sub> NH | –         |
| 16    |     | Ph <sub>2</sub> NPMP         | –         |

In the cases of electron poor aryl iodides, *p*-acetyl-iodobenzene (entries 1–4) and *p*-cyano-iodobenzene (entries 5–8), product formation in the absence of 4CzIPN was observed, while electron neutral iodobenzene (entries 9–12) and electron rich *p*-methoxy-iodobenzene (entries 13–16) remain unreacted.

The successful reactivity in the presence of Ph<sub>2</sub>NPMP, which cannot generate an  $\alpha$ -aminoalkyl radical, supports the feasibility of an EDA-initiated process.

## UV/Vis Absorption Spectroscopy Studies

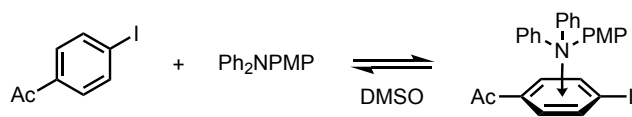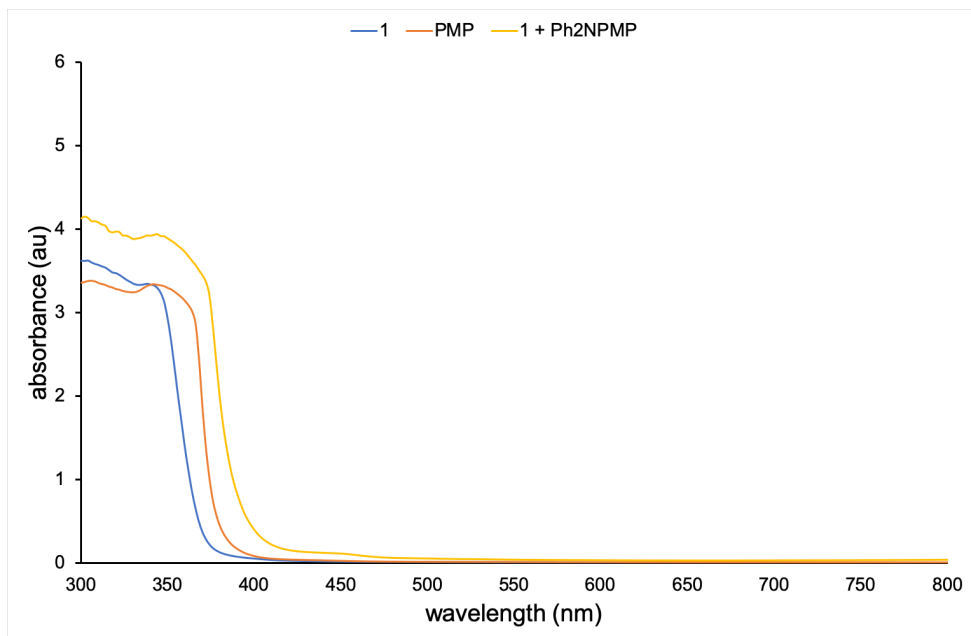

Figure S2.

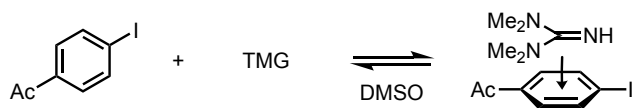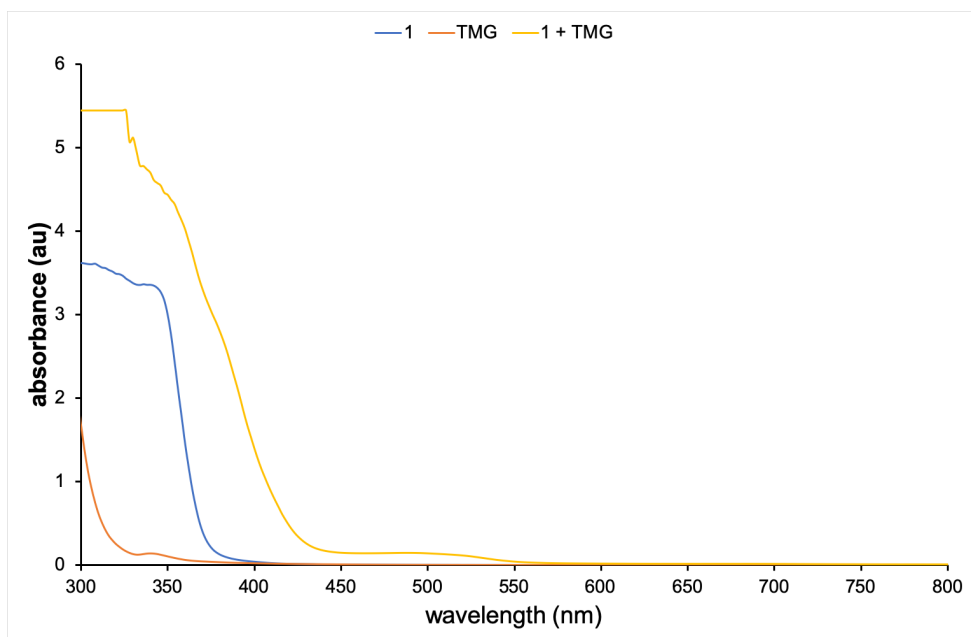

Figure S3.

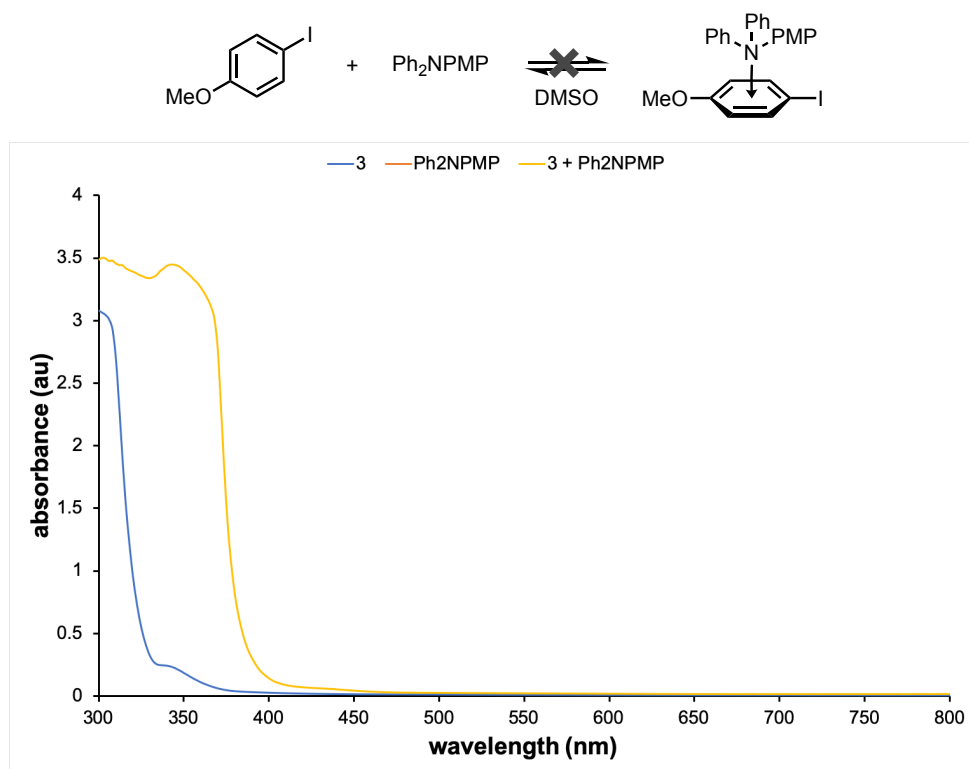

**Figure S4.**

### EDA-Based Arylation of Pyrrole Using Catalytic Amine

In order to validate the ability of transient EDA complexes to initiate the radical reactivity we have identified conditions to enable the arylation of *N*-Me-pyrrole. In order to exclude the intermediacy of a purely photochemical EDA-based reactivity, the experiments were run with 20 mol% of Ph<sub>2</sub>NPMP.

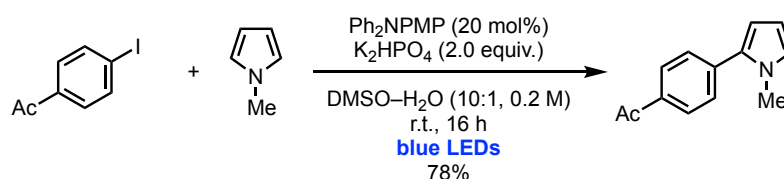

A dry tube equipped with a stirring bar was charged with **1** (25 mg, 0.10 mmol, 1.0 equiv.), Ph<sub>2</sub>NPMP (5.5 mg, 0.02 mmol, 20 mol%) and K<sub>2</sub>HPO<sub>4</sub> (35 mg, 0.2 mmol, 2.0 equiv.). The tube was capped with a Supelco aluminium crimp seal with septum (PTFE/butyl), evacuated and refilled with N<sub>2</sub> (x 3). Degassed DMSO–H<sub>2</sub>O (10:1) (0.5 mL, 0.2 M) and **2** (0.45 mL, 5.0 mmol, 50.0 equiv.) were sequentially added. The blue LEDs were turned on and the mixture was stirred under irradiation for 16 h at room temperature. 1,3-Dinitrobenzene (8.4 mg, 0.05 mmol, 0.5 equiv.) was added as the internal standard. Brine (5 mL) and EtOAc (5 mL) were added and the mixture was

shaken vigorously. The layers were separated and the aqueous layer was extracted with EtOAc (10 mL x 2). The combined organic layers were dried ( $\text{MgSO}_4$ ), filtered and evaporated. The crude was solubilised in  $\text{CDCl}_3$  (0.6 mL) and analysed by  $^1\text{H}$  NMR spectroscopy to determine the  $^1\text{H}$  NMR yield.

### 3.4 Emission Quenching (Stern-Volmer) Studies

Stern-Volmer experiments were carried out monitoring the emission intensity of argon-degassed solutions of 4CzIPN ( $2 \times 10^{-5}$  M) containing variable amounts of the quencher in dry DMSO. The  $k_q$  are reported in Scheme 2D of the article.

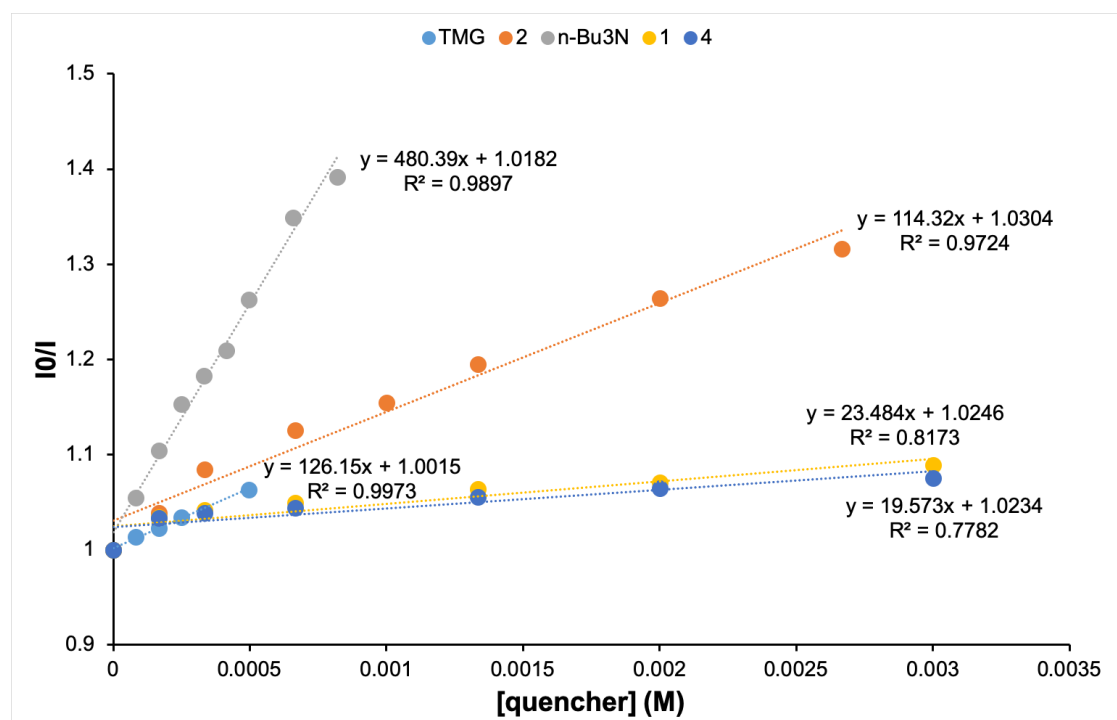

Figure S5.



### 3.5 Experiments with Sub-stoichiometric Amounts of *n*-Bu<sub>3</sub>N

To gain insights on the  $\alpha$ -aminoalkyl radical-initiated radical-chain process, we run reactions with sub-stoichiometric amounts of *n*-Bu<sub>3</sub>N. The reactions were run using K<sub>2</sub>HPO<sub>4</sub> in place of TMG as the base to avoid the presence of the EDA reactivity (see section 3.3).

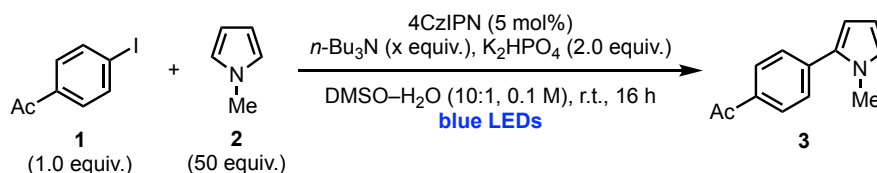

These experiments were performed according to **GP1**.

**Table S3.**

| Entry    | <i>n</i> -Bu <sub>3</sub> N (equiv.) | Yield (%) |
|----------|--------------------------------------|-----------|
| <b>1</b> | 2.0                                  | 60        |
| <b>2</b> | 0.2                                  | 65        |
| <b>3</b> | 0.05                                 | 43        |
| <b>4</b> | —                                    | —         |

In theory, every molecule of *n*-Bu<sub>3</sub>N could lead to the XAT-activation of up to 3 molecules of aryl iodide, which give a maximum yield of 15%. The good reaction performance in the presence of 5 mol% *n*-Bu<sub>3</sub>N (entry 3) supports the presence of a radical-chain process initiated by the  $\alpha$ -aminoalkyl radicals.

### 3.6 Evaluating the Presence of Photoactive Poly-pyrroles

Recently, Zheng and co-workers<sup>3</sup> reported the activation of aryl halides via photoinduced disproportionation of pyrroles. They described that commercial samples of *N*-methylpyrrole contain visible light-absorbing oligomers that, upon irradiation, are responsible for the formation of highly reducing  $[N\text{-methylpyrrole}]^{\bullet-}$ , which can reduce aryl halides. This means that under blue light irradiation C–H arylation can occur in the absence of an external photocatalyst.

To exclude this pathway under our reaction conditions we have run all reactions with distilled *N*-methylpyrrole. Furthermore, we have performed two reactions in parallel with and without photocatalyst and monitored them every h for a total of 4 hours. *p*-Methoxy-iodobenzene **4** and  $\text{K}_2\text{HPO}_4$  were used to exclude the intermediacy of the EDA initiated radical-chain propagation in the photocatalyst-free reaction.

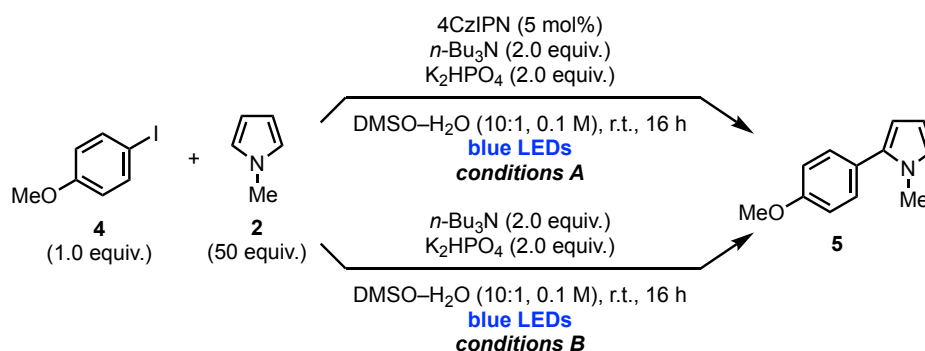

These experiments were performed according to **GP1**.

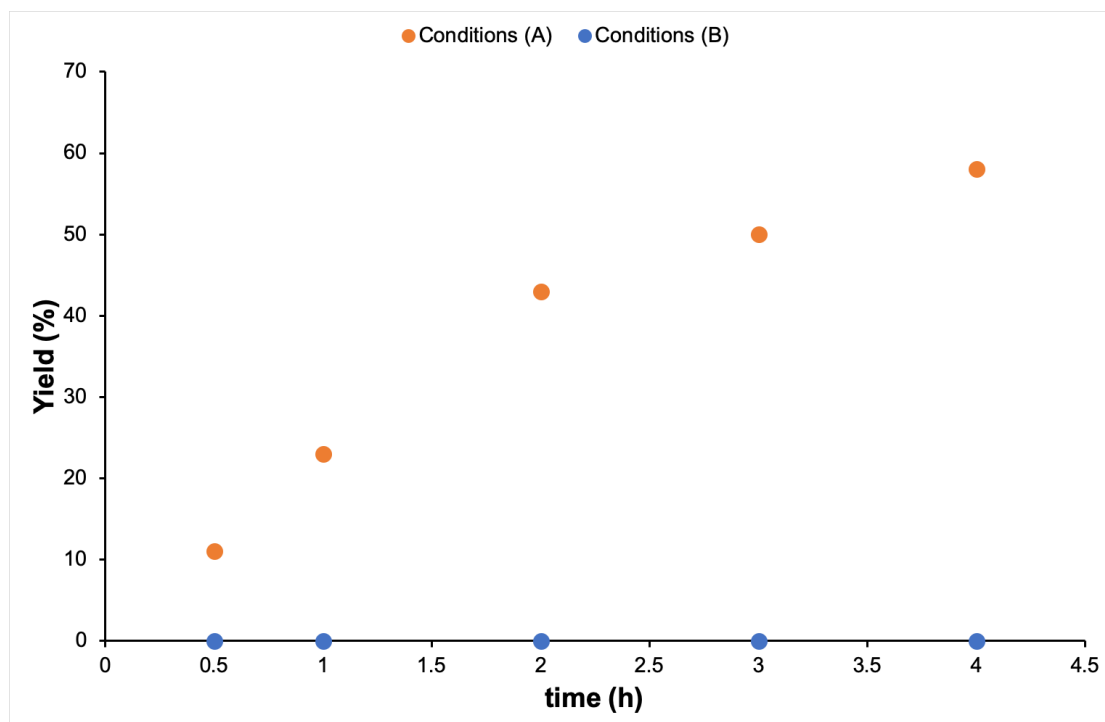

**Figure S6.**

No product formation was observed in the absence of 4CzIPN which rules out the presence of a poly-pyrrole-based photochemical reactivity under our conditions.

## 4 Substrate Scope for the Radical C–H Arylation

### General Procedure for Radical C–H Arylation – GP2

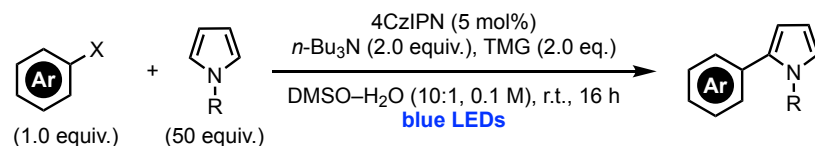

A dry tube equipped with a stirring bar was charged with the aryl halide (0.10 mmol, 1.0 equiv.) and 4CzIPN (4 mg, 5  $\mu$ mol, 5 mol%). The tube was capped with a Supelco aluminium crimp seal with septum (PTFE/butyl), evacuated and refilled with N<sub>2</sub> (x 3). Degassed DMSO–H<sub>2</sub>O (10:1) (1.0 mL, 0.1 M), *n*-Bu<sub>3</sub>N (48  $\mu$ L, 0.2 mmol, 2.0 equiv.), 1,1,3,3-tetramethylguanidine (25  $\mu$ L, 0.2 mmol, 2.0 equiv.) and the pyrrole (5.0 mmol, 50.0 equiv.) were sequentially added. The blue LEDs were turned on and the mixture was stirred under irradiation for 16 h at room temperature. Brine (5 mL) and EtOAc (5 mL) were added and the mixture was shaken vigorously. The layers were separated and the aqueous layer was extracted with EtOAc (10 mL x 2). The combined organic layers were dried (MgSO<sub>4</sub>), filtered and evaporated. Purification by flash column chromatography on silica gel gave the products.

#### 1-(4-(1-Methyl-1H-pyrrol-2-yl)phenyl)ethan-1-one (3)

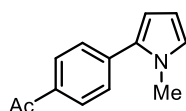

Following **GP2**, 4-iodoacetophenone (25 mg, 0.10 mmol) and *N*-Me-pyrrole (444  $\mu$ L, 5.0 mmol, 50.0 equiv.) gave **3** (15 mg, 73%) as a solid. <sup>1</sup>H NMR (300 MHz, CDCl<sub>3</sub>)  $\delta$  8.09–7.88 (2H, m), 7.61–7.42 (2H, m), 6.85–6.71 (1H, m), 6.36 (1H, dd, *J* = 3.7, 1.8 Hz), 6.24 (1H, dd, *J* = 3.6, 2.7 Hz), 3.73 (3H, s), 2.63 (3H, s). Data in accordance with the literature.<sup>4</sup>

#### 1-Methyl-2-(4-nitrophenyl)-1H-pyrrole (5)

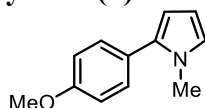

Following **GP2**, 4-iodoanisole (24 mg, 0.10 mmol) and *N*-Me-pyrrole (444  $\mu$ L, 5.0 mmol, 50.0 equiv.) gave **5** (11 mg, 58%) as a solid. <sup>1</sup>H NMR (600 MHz, CDCl<sub>3</sub>)  $\delta$  7.31 (2H, d, *J* = 8.8 Hz), 6.93 (2H, d, *J* = 8.8 Hz), 6.68 (1H, m), 6.20–6.12 (1H, m), 3.83 (3H, s), 3.62 (s, 3H). Data in accordance with the literature.<sup>5</sup>

### Methyl 4-(1-methyl-1H-pyrrol-2-yl)benzoate (**7**)

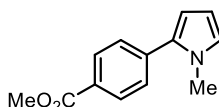

Following **GP2**, methyl 4-iodobenzoate (26 mg, 0.10 mmol) and *N*-Me-pyrrole (444  $\mu$ L, 5.0 mmol, 50.0 equiv.) gave **7** (9 mg, 42%) as a solid.  $^1\text{H}$  NMR (400 MHz,  $\text{CDCl}_3$ )  $\delta$  8.06 (2H, d,  $J = 8.0$  Hz), 7.48 (2H, d,  $J = 8.0$  Hz), 6.76 (1H, s), 6.35–6.33 (1H, m), 6.23–6.22 (1H, m), 3.93 (3H, s), 3.71 (3H, s). Data in accordance with the literature.<sup>6</sup>

### 4-(1-Methyl-1H-pyrrol-2-yl)benzotrile (**8**)

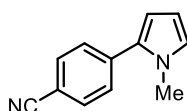

Following **GP2**, 4-iodobenzotrile (23 mg, 0.10 mmol) and *N*-Me-pyrrole (444  $\mu$ L, 5.0 mmol, 50.0 equiv.) gave **8** (13 mg, 71%) as a solid.  $^1\text{H}$  NMR (400 MHz,  $\text{CDCl}_3$ )  $\delta$  7.69 (2H, d,  $J = 8.2$  Hz), 7.53 (2H, d,  $J = 8.2$  Hz), 6.81 (1H, s), 6.41–6.34 (1H, m), 6.26 (1H, t,  $J = 3.1$  Hz), 3.74 (3H, s). Data in accordance with the literature.<sup>7</sup>

Following **GP2**, 4-bromobenzotrile (18.2 mg, 0.10 mmol) and *N*-Me-pyrrole (444  $\mu$ L, 5.0 mmol, 50.0 equiv.) gave **8** (10 mg, 54%) as a solid.

Following **GP2**, 4-chlorobenzotrile (13.7 mg, 0.10 mmol) and *N*-Me-pyrrole (444  $\mu$ L, 5.0 mmol, 50.0 equiv.) gave **8** (6 mg, 33%) as a solid.

### 4-(1-Methyl-1H-pyrrol-2-yl)benzaldehyde (**9**)

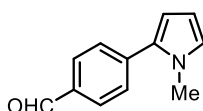

Following **GP2**, 4-iodobenzaldehyde (23 mg, 0.10 mmol) and *N*-Me-pyrrole (444  $\mu$ L, 5.0 mmol, 50.0 equiv.) gave **9** (13 mg, 67%) as a solid.  $^1\text{H}$  NMR (300 MHz,  $\text{CDCl}_3$ )  $\delta$  10.01 (1H, s), 7.94–7.85 (2H, m), 7.62–7.53 (2H, m), 6.83–6.76 (1H, m), 6.40 (1H, dd,  $J = 3.7, 1.8$  Hz), 6.25 (1H, dd,  $J = 3.7, 2.7$  Hz), 3.74 (3H, s). Data in accordance with the literature.<sup>8</sup>

Following **GP2**, 4-bromobenzaldehyde (18 mg, 0.10 mmol) and *N*-Me-pyrrole (444  $\mu$ L, 5.0 mmol, 50.0 equiv.) gave **9** (8 mg, 42%) as a solid.

Following **GP2**, 4-chlorobenzaldehyde (14 mg, 0.10 mmol) and *N*-Me-pyrrole (444  $\mu$ L, 5.0 mmol, 50.0 equiv.) gave **9** (8 mg, 42%) as a solid.

### 1-Methyl-2-(4-nitrophenyl)-1H-pyrrole (**10**)

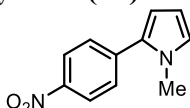

Following **GP2**, 1-iodo-4-nitrobenzene (25 mg, 0.10 mmol) and *N*-Me-pyrrole (444  $\mu$ L, 5.0 mmol, 50.0 equiv.) gave **10** (15 mg, 70%) as a solid.  $^1\text{H NMR}$  (400 MHz,  $\text{CDCl}_3$ )  $\delta$  8.26 (2H, d,  $J = 8.6$  Hz), 7.55 (2H, d,  $J = 8.6$  Hz), 6.82 (1H, m), 6.42 (1H, dd,  $J = 3.4, 1.7$  Hz), 6.25 (1H, t,  $J = 3.4$  Hz), 3.75 (3H, s). Data in accordance with the literature.<sup>9</sup>

Following **GP2**, 1-bromo-4-nitrobenzene (20 mg, 0.10 mmol) and *N*-Me-pyrrole (444  $\mu$ L, 5.0 mmol, 50.0 equiv.) gave **10** (3 mg, 14%) as a solid.

### 2-(4-Fluorophenyl)-1-methyl-1H-pyrrole (**11**)

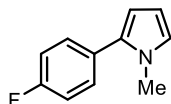

Following **GP2**, 4-fluoriodobenzene (12  $\mu$ L, 0.10 mmol) and *N*-Me-pyrrole (444  $\mu$ L, 5.0 mmol, 50.0 equiv.) gave **11** (10 mg, 54%) as a solid.  $^1\text{H NMR}$  (600 MHz,  $\text{CDCl}_3$ )  $\delta$  7.38 (2H, dd,  $J = 8.8, 5.4$  Hz), 7.11 (2H, dd,  $J = 8.7, 8.7$  Hz), 6.73 (1H, t,  $J = 4.5$  Hz), 6.20–6.17 (m, 2H), 3.62 (3H, s). Data in accordance with the literature.<sup>5</sup>

### 1-Methyl-2-phenyl-1H-pyrrole (**12**)

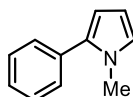

Following **GP2**, iodobenzene (11  $\mu$ L, 0.10 mmol) and *N*-Me-pyrrole (444  $\mu$ L, 5.0 mmol, 50.0 equiv.) gave **12** (9 mg, 55%) as a solid.  $^1\text{H NMR}$  (600 MHz,  $\text{CDCl}_3$ )  $\delta$  7.42–7.3 (4H, m), 7.32–7.26 (1H, m), 6.73 (1H, t,  $J = 4.5$  Hz), 6.24 (1H, dd,  $J = 3.6, 1.8$  Hz), 6.18 (1H, dd,  $J = 3.6, 2.7$  Hz), 3.03 (3 H, s). Data in accordance with the literature.<sup>5</sup>

### 1-Methyl-2-(*p*-tolyl)-1H-pyrrole (**13**)

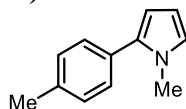

Following **GP2**, 4-iodotoluene (22 mg, 0.10 mmol) and *N*-Me-pyrrole (444  $\mu$ L, 5.0 mmol, 50.0 equiv.) gave **13** (9 mg, 48%) as an oil.  $^1\text{H NMR}$  (400 MHz,  $\text{CDCl}_3$ )  $\delta$  7.32

(2H, d,  $J = 8.0$  Hz), 7.23 (2H, d,  $J = 8.0$  Hz), 6.72 (1H, t,  $J = 2.0$  Hz), 6.21 (2H, d,  $J = 2.4$  Hz), 3.67 (3H, s), 2.40 (3H, s). Data in accordance with the literature.<sup>6</sup>

#### 4-(1-Methylpyrrol-2-yl)phenylamine (**14**)

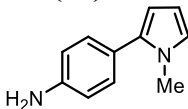

Following **GP2**, 4-iodoaniline (22 mg, 0.10 mmol) and *N*-Me-pyrrole (444  $\mu$ L, 5.0 mmol, 50.0 equiv.) gave **14** (11 mg, 63%) as an oil. <sup>1</sup>H NMR (400 MHz, CDCl<sub>3</sub>)  $\delta$  7.21 (2H, d,  $J = 8.1$  Hz), 6.73 (2H, d,  $J = 8.1$  Hz), 6.69 (1H, m), 6.19 (1H, m), 6.14 (1H, m), 3.75 (2H, br s), 3.63 (3H, s). Data in accordance with the literature.<sup>10</sup>

#### 3-(1-Methyl-1H-pyrrol-2-yl)benzotrile (**15**)

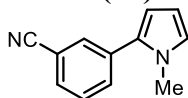

Following **GP2**, 3-iodobenzotrile (23 mg, 0.10 mmol) and *N*-Me-pyrrole (444  $\mu$ L, 5.0 mmol, 50.0 equiv.) gave **15** (14 mg, 77%) as a solid. <sup>1</sup>H NMR (500 MHz, CDCl<sub>3</sub>)  $\delta$  7.67 (1H, td,  $J = 1.7, 0.6$  Hz), 7.62 (1H, ddd,  $J = 7.8, 1.8, 1.3$  Hz), 7.56 (1H, dt,  $J = 7.7, 1.3$  Hz), 7.50 (1H, td,  $J = 7.8, 0.6$  Hz), 6.76 (1H, dd,  $J = 2.5, 1.9$  Hz), 6.28 (1H, dd,  $J = 3.6, 1.7$  Hz), 6.22 (1H,  $J = 3.6, 2.7$  Hz), 3.68 (3H, s). Data in accordance with the literature.<sup>11</sup>

#### 2-(3,5-Bis(trifluoromethyl)phenyl)-1-methyl-1H-pyrrole (**16**)

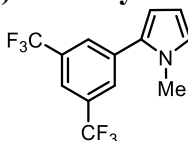

Following **GP2**, 1-iodo-3,5-bis(trifluoromethyl)benzene (18  $\mu$ L, 0.10 mmol) and *N*-Me-pyrrole (444  $\mu$ L, 5.0 mmol, 50.0 equiv.) gave **16** (20 mg, 67%) as an oil. <sup>1</sup>H NMR (300 MHz, CDCl<sub>3</sub>)  $\delta$  7.86 (2H, s), 7.81 (1H, s), 6.82 (1H, dd,  $J = 2.4, 2.0$  Hz), 6.39 (1H, dd,  $J = 3.7, 1.8$  Hz), 6.27 (1H, dd,  $J = 3.7, 2.7$  Hz), 3.73 (3H, s). Data in accordance with the literature.<sup>8</sup>

### 1-Methyl-2-(*m*-tolyl)-1H-pyrrole (17)

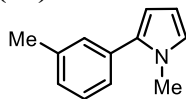

Following **GP2**, 3-iodotoluene (14  $\mu$ L, 0.10 mmol) and *N*-Me-pyrrole (444  $\mu$ L, 5.0 mmol, 50.0 equiv.) gave **17** (9 mg, 48%) as an oil.  $^1\text{H}$  NMR (400 MHz,  $\text{CDCl}_3$ )  $\delta$  7.32–7.29 (1H, m), 7.25–7.22 (2H, m), 7.14 (1H, d,  $J = 8.0$  Hz), 6.73 (1H, t,  $J = 2.0$  Hz), 6.24–6.21 (2H, m), 3.68 (3H, s), 2.41 (3H, s). Data in accordance with the literature.<sup>6</sup>

### 2-(3-Methoxyphenyl)-1-methyl-1H-pyrrole (18)

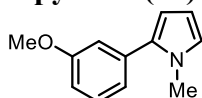

Following **GP2**, 3-iodoanisole (12  $\mu$ L, 0.10 mmol) and *N*-Me-pyrrole (444  $\mu$ L, 5.0 mmol, 50.0 equiv.) gave **18** (9 mg, 49%) as an oil.  $^1\text{H}$  NMR (600 MHz,  $\text{CDCl}_3$ )  $\delta$  7.30 (1H, m), 6.98 (1H, ddd,  $J = 7.6, 1.6, 1.0$  Hz), 6.94 (1H, dd,  $J = 2.5, 1.5$  Hz), 6.84 (1H, ddd,  $J = 8.3, 2.6, 1.0$  Hz), 6.70 (1H, t,  $J = 4.5$  Hz), 6.22 (1H, d,  $J = 3.6$  Hz), 6.19 (1H, d,  $J = 3.4$  Hz), 3.83 (3H, s), 3.66 (3H, s). Data in accordance with the literature.<sup>5</sup>

### 1-Methyl-2-(*o*-tolyl)-1H-pyrrole (19)

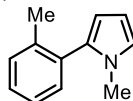

Following **GP2**, 2-iodotoluene (13  $\mu$ L, 0.10 mmol) and *N*-Me-pyrrole (444  $\mu$ L, 5.0 mmol, 50.0 equiv.) gave **19** (15 mg, 38%) as an oil.  $^1\text{H}$  NMR (400 MHz,  $\text{DMSO-d}_6$ )  $\delta$  7.31–7.18 (4H, m), 6.80 (1H, s), 6.06 (s, 1H), 5.95 (s, 1H), 3.35 (s, 3H), 2.13 (s, 3H). Data in accordance with the literature.<sup>12</sup>

### 2-(2-Fluorophenyl)-1-methyl-1H-pyrrole (20)

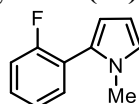

Following **GP2**, 2-fluoroiodobenzene (12  $\mu$ L, 0.10 mmol) and *N*-Me-pyrrole (444  $\mu$ L, 5.0 mmol, 50.0 equiv.) gave **20** (14 mg, 80%) as an oil.  $^1\text{H}$  NMR (400 MHz,  $\text{CDCl}_3$ )  $\delta$  7.38–7.32 (2H, m), 7.19–7.12 (2H, m), 6.78 (1H, t,  $J = 2.0$  Hz), 6.25 (2H, d,  $J = 2.0$  Hz), 3.58 (3H, s). Data in accordance with the literature.<sup>6</sup>



### 1-Methyl-2-(naphthalen-1-yl)-1H-pyrrole (21)

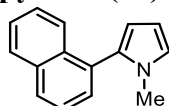

Following **GP2**, 1-iodonaphthalene (15  $\mu$ L, 0.10 mmol) and *N*-Me-pyrrole (444  $\mu$ L, 5.0 mmol, 50.0 equiv.) gave **21** (9 mg, 40%) as an oil.  $^1\text{H}$  NMR (400 MHz,  $\text{CDCl}_3$ )  $\delta$  7.93–7.85 (2H, m), 7.76–7.70 (1H, m), 7.55–7.42 (4H, m), 6.86–6.80 (1H, m), 6.34–6.30 (1H, m), 6.27 (1H, dd,  $J = 3.5, 1.8$  Hz), 3.40 (3H, s). Data in accordance with the literature.<sup>13</sup>

### 1-Methyl-2-(naphthalen-2-yl)-1H-pyrrole (22)

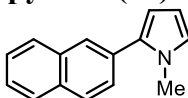

Following **GP2**, 2-iodonaphthalene (25 mg, 0.10 mmol) and *N*-Me-pyrrole (444  $\mu$ L, 5.0 mmol, 50.0 equiv.) gave **22** (12 mg, 57%) as a solid.  $^1\text{H}$  NMR (400 MHz,  $\text{CDCl}_3$ )  $\delta$  8.07–8.00 (4H, m), 7.77 (1H, d,  $J = 7.8$  Hz), 7.71–7.62 (2H, m), 6.94 (1H, m), 6.61 (1H, m), 6.50 (1H, m), 3.86 (3H, s). Data in accordance with the literature.<sup>14</sup>

### 2-(1-Methyl-1H-pyrrol-2-yl)pyrazine (23)

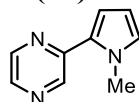

Following **GP2**, iodopyrazine (9.9  $\mu$ L, 0.10 mmol) and *N*-Me-pyrrole (444  $\mu$ L, 5.0 mmol, 50.0 equiv.) gave **23** (10 mg, 65%) as an oil.  $^1\text{H}$  NMR (400 MHz,  $\text{CDCl}_3$ )  $\delta$  8.84 (1H, br s), 8.45 (1H, br s), 8.29 (1H, br s), 6.80 (1H, m), 6.72 (1H, d,  $J = 4.3$  Hz), 6.22 (1H, t,  $J = 3.6$  Hz), 4.00 (3H, s). Data in accordance with the literature.<sup>15</sup>

### 4-(1-Methyl-1H-pyrrol-2-yl)pyridine (24)

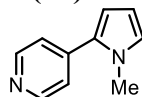

Following **GP2**, 4-iodopyridine (20.5 mg, 0.10 mmol) and *N*-Me-pyrrole (444  $\mu$ L, 5.0 mmol, 50.0 equiv.) gave **24** (12 mg, 73%) as an oil.  $^1\text{H}$  NMR (200 MHz,  $\text{CDCl}_3$ )  $\delta$  8.56 (2H, d,  $J = 4.7$  Hz), 7.39 (2H, d,  $J = 4.7$  Hz, 2H), 6.78 (1H, dd,  $J = 3.2, 1.7$  Hz), 6.43 (1H, dd,  $J = 3.6, 1.7$  Hz), 6.22 (1H, dd,  $J = 3.6, 3.2$  Hz), 3.75 (3H, s). Data in accordance with the literature.<sup>16</sup>

Following **GP2** but with 3.0 equiv. of TMG (38  $\mu$ L, 0.30 mmol), 4-bromopyridine hydrochloride (19 mg, 0.10 mmol) and *N*-Me-pyrrole (444  $\mu$ L, 5.0 mmol, 50.0 equiv.) gave **24** (6 mg, 37%) as an oil.

Following **GP2** but with 3 equiv. of TMG (38  $\mu$ L, 0.30 mmol), 4-chloropyridine hydrochloride (15 mg, 0.10 mmol) and *N*-Me-pyrrole (444  $\mu$ L, 5.0 mmol, 50.0 equiv.) gave **24** (4 mg, 24%) as an oil.

### 1-Methyl-2-(thiophen-2-yl)-1H-pyrrole (**25**)

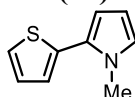

Following **GP2**, 2-iodothiophene (11  $\mu$ L, 0.10 mmol) and *N*-Me-pyrrole (444  $\mu$ L, 5.0 mmol, 50.0 equiv.) gave **25** (11 mg, 67%) as an oil.  $^1\text{H}$  NMR (400 MHz,  $\text{CDCl}_3$ )  $\delta$  7.53 (2H, d,  $J = 8.4$  Hz), 7.28 (2H, d,  $J = 8.4$  Hz), 6.74 (1H, t,  $J = 2.4$  Hz), 6.25–6.21 (1H, m), 6.21–6.20 (1H, m), 3.66 (3H, s). Data in accordance with the literature.<sup>6</sup>

### 1-(5-(1-Methyl-1H-pyrrol-2-yl)thiophen-2-yl)ethan-1-one (**26**)

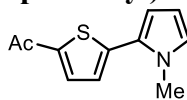

Following **GP2**, 2-acetyl-5-iodothiophene (25 mg, 0.10 mmol) and *N*-Me-pyrrole (444  $\mu$ L, 5.0 mmol, 50.0 equiv.) gave **26** (14 mg, 64%) as a solid.  $^1\text{H}$  NMR (400 MHz,  $\text{CDCl}_3$ )  $\delta$  7.62 (1H, d,  $J = 4.0$  Hz), 7.06 (1H, d,  $J = 4.0$  Hz), 6.77–6.72 (1H, m), 6.51 (1H, dd,  $J = 3.8, 1.8$  Hz), 6.18 (1H, dd,  $J = 3.8, 2.7$  Hz, 1H), 3.81 (3H, s), 2.55 (3H, s). Data in accordance with the literature.<sup>13</sup>

### 2-(3-Bromophenyl)-1-methyl-1H-pyrrole (**27**)

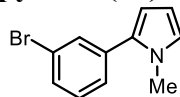

Following **GP2**, 3-bromoiodobenzene (13  $\mu$ L, 0.10 mmol) and *N*-Me-pyrrole (444  $\mu$ L, 5.0 mmol, 50.0 equiv.) gave **27** (18 mg, 75%) as an oil.  $^1\text{H}$  NMR (400 MHz,  $\text{CDCl}_3$ )  $\delta$  7.55 (1H, d,  $J = 1.6$  Hz), 7.42 (1H, d,  $J = 1.6$  Hz), 7.40–7.31 (1H, m), 7.24–7.22 (1H, m), 6.71 (1H, t,  $J = 2.0$  Hz), 6.24–6.18 (2H, m), 3.65 (3H, s). Data in accordance with the literature.<sup>6</sup>

### 2-(4-Bromophenyl)-1-methyl-1H-pyrrole (28)

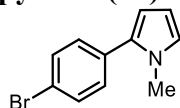

Following **GP2**, 4-bromoiodobenzene (28 mg, 0.10 mmol) and *N*-Me-pyrrole (444  $\mu$ L, 5.0 mmol, 50.0 equiv.) gave **28** (16 mg, 65%) as an oil.  $^1\text{H NMR}$  (400 MHz,  $\text{CDCl}_3$ )  $\delta$  7.53 (2H, d,  $J = 8.4$  Hz), 7.28 (2H, d,  $J = 8.4$  Hz), 6.74 (1H, t,  $J = 2.4$  Hz), 6.25–6.21 (1H, m), 6.21–6.20 (1H, m), 3.66 (3H, s). Data in accordance with the literature.<sup>6</sup>

### 2-(2-Chlorophenyl)-1-methyl-1H-pyrrole (29)

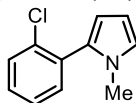

Following **GP2**, 1-chloro-2-iodobenzene (12  $\mu$ L, 0.10 mmol) and *N*-Me-pyrrole (444  $\mu$ L, 5.0 mmol, 50.0 equiv.) gave **29** (9 mg, 70%) as an oil.  $^1\text{H NMR}$  (400 MHz,  $\text{CDCl}_3$ )  $\delta$  7.48–7.46 (1H, m), 7.37–7.30 (3H, m), 6.75 (1H, m), 6.25–6.17 (2H, m), 3.49 (3H, s). Data in accordance with the literature.<sup>6</sup>

### 2-Chloro-4-(1-methyl-1H-pyrrol-2-yl)pyridine (30)

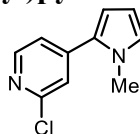

Following **GP2**, 4-bromo-2-chloropyridine (11  $\mu$ L, 0.10 mmol) and *N*-Me-pyrrole (444  $\mu$ L, 5.0 mmol, 50.0 equiv.) gave **30** (9 mg, 44%) as a solid.  $^1\text{H NMR}$  (400 MHz,  $\text{CDCl}_3$ )  $\delta$  8.26 (1H, d,  $J = 5.1$  Hz), 7.26 (1H, s), 7.18 (1H, d,  $J = 5.1$  Hz), 6.72 (1H, s), 6.38 (1H, s), 6.15 (1H, s), 3.68 (3H, s). Data in accordance with the literature.<sup>17</sup>

### 3-(1-Methyl-1H-pyrrol-2-yl)pyridine (31)

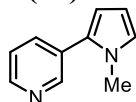

Following **GP2**, 3-bromopyridine (9.7  $\mu$ L, 0.10 mmol) and *N*-Me-pyrrole (444  $\mu$ L, 5.0 mmol, 50.0 equiv.) gave **31** (6 mg, 38%) as an oil.  $^1\text{H NMR}$  (400 MHz,  $\text{CDCl}_3$ )  $\delta$  8.69 (1H, d,  $J = 1.8$  Hz), 8.53 (1H, dd,  $J = 4.8, 1.5$  Hz), 7.74–7.66 (1H, m), 7.36–7.28 (1H, m), 6.81–6.72 (1H, m), 6.30 (1H, dd,  $J = 3.6, 1.8$  Hz), 6.25–6.18 (1H, m), 3.68 (3H, s). Data in accordance with the literature.<sup>13</sup>

Following **GP2**, 3-chloropyridine (9.6  $\mu$ L, 0.10 mmol) gave **31** (3 mg, 15%) as an oil.

### 2-(1-Methyl-1H-pyrrol-2-yl)benzonitrile (**32**)

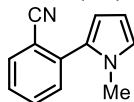

Following **GP2**, 2-iodobenzonitrile (23 mg, 0.10 mmol) and *N*-Me-pyrrole (444  $\mu$ L, 5.0 mmol, 50.0 equiv.) gave **32** (12 mg, 65%) as a solid.  $^1\text{H}$  NMR (400 MHz,  $\text{CDCl}_3$ )  $\delta$  7.77 (1H, d,  $J = 7.7$  Hz), 7.63 (1H, t,  $J = 7.7$  Hz), 7.49–7.42 (2H, m), 6.82 (1H, m), 6.50–6.36 (1H, m), 6.28 (1H t,  $J = 2.9$  Hz), 3.64 (3H, s). Data in accordance with the literature.<sup>7</sup>

### 2-(1H-Pyrrol-2-yl)benzonitrile (**33**)

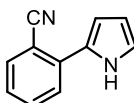

Following **GP2**, 2-iodobenzonitrile (22.9 mg, 0.10 mmol) and pyrrole (345  $\mu$ L, 50.0 equiv., 5.0 mmol) gave **33** (12 mg, 71%) as a solid.  $^1\text{H}$  NMR (400 MHz,  $\text{CDCl}_3$ )  $\delta$  9.21 (1H, br s), 7.70–7.59 (2H, m), 7.59–7.49 (1H, m), 7.31–7.18 (1H, m), 7.01–6.93 (1H, m), 6.89–6.80 (1H, m), 6.40–6.31 (1H, m). Data in accordance with the literature.<sup>8</sup>

### 2-(3,5-Dimethyl-1H-pyrrol-2-yl)benzonitrile (**34**)

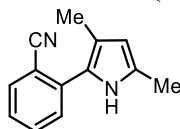

Following **GP2**, 2-iodobenzonitrile (23 mg, 0.1 mmol) and 2,4-dimethylpyrrole (515  $\mu$ L, 50.0 equiv., 5.0 mmol) gave **34** (15 mg, 75%) as a solid.  $^1\text{H}$  NMR (400 MHz,  $\text{DMSO-}d_6$ ):  $\delta$  10.76 (1H, s), 7.83 (1H, dd,  $J = 7.8, 0.9$  Hz), 7.69 (1H, td,  $J = 7.8, 1.4$  Hz), 7.52–7.35 (2H, m), 5.74 (1H, d,  $J = 2.2$  Hz), 2.19 (3H, s), 2.00 (3H, s). Data in accordance with the literature.<sup>4</sup>

### 2-(4-Ethyl-3,5-dimethyl-1H-pyrrol-2-yl)benzonitrile (**35**)

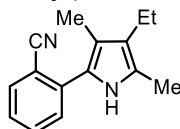

Following **GP2**, 2-iodobenzonitrile (23 mg, 0.10 mmol) and 3-ethyl-2,4-dimethylpyrrole (675  $\mu$ L, 50.0 equiv., 5.0 mmol) gave **35** (17 mg, 76%) as a solid.  $^1\text{H}$  NMR (400 MHz,  $\text{DMSO-}d_6$ )  $\delta$  10.58 (1H, s), 7.82 (1H, dd,  $J = 7.8, 1.2$  Hz), 7.67 (1H, td,  $J = 7.7, 1.4$  Hz), 7.44 (1H, d,  $J = 7.9$  Hz), 7.39 (1H, td,  $J = 7.6, 1.1$  Hz), 2.35 (2H,

q,  $J = 7.5$  Hz), 2.16 (3H, s), 1.96 (3H, s), 1.03 (3H, t,  $J = 7.5$  Hz). Data in accordance with the literature.<sup>4</sup>

### 1-(2-Iodobenzyl)-1H-pyrrole (36)

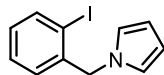

To a solution of pyrrole (94  $\mu$ L, 1.35 mmol) in DMF (7 mL) was added NaOH (218 mg, 5.45 mmol, 4.0 equiv.) at 0 °C. The mixture was stirred for 10 min then 2-iodobenzyl bromide (400 mg, 1.35 mmol, 1.0 equiv.) was added and the reaction was allowed to stir at room temperature for 36 h. The mixture was diluted with Et<sub>2</sub>O (10 mL) and NH<sub>4</sub>Cl sat. (10 mL). The layers were separated and the aqueous layer was extracted with Et<sub>2</sub>O (2 x 10 mL). The combined organic layers were washed with NH<sub>4</sub>Cl sat. and brine, dried (MgSO<sub>4</sub>), filtered and evaporated. The crude material was purified by flash column chromatography eluting with petrol–Et<sub>2</sub>O (0%  $\rightarrow$  10%) to give **36** (342 mg, 90%) as an oil. <sup>1</sup>H NMR (CDCl<sub>3</sub>, 500 MHz)  $\delta$  7.84 (1H, dd,  $J = 7.9, 1.2$  Hz), 7.29–7.23 (2H, m), 6.97 (1H, td,  $J = 7.6, 1.7$  Hz), 6.71 (2H, t,  $J = 2.1$  Hz), 6.64 (1H, dd,  $J = 7.8, 1.7$  Hz), 6.23 (2H, t,  $J = 2.1$  Hz), 5.08 (2H, s). Data in accordance with the literature.<sup>18</sup>

### 5H-Pyrrolo[2,1-a]isoindole (37)

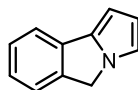

Following **GP2**, 1-(2-iodobenzyl)-1H-pyrrole (28 mg, 0.10 mmol) gave **37** (6 mg, 36%) as a solid. <sup>1</sup>H NMR (400 MHz, CDCl<sub>3</sub>)  $\delta$  7.48 (1H, d,  $J = 7.6$  Hz), 7.38–7.29 (2H, m), 7.15 (1H, t,  $J = 7.5$  Hz), 6.99–6.93 (1H, m), 6.38–6.33 (1H, m), 6.32–6.27 (1H, m), 4.93 (2H, s). Data in accordance with the literature.<sup>19</sup>

## 5 Substrate Scope for the Radical Phosphonylation

### General Procedure – GP3

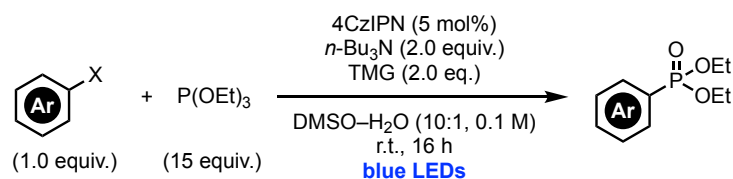

A dry tube equipped with a stirring bar was charged with the aryl halide (0.10 mmol, 1.0 equiv.) and 4CzIPN (4 mg, 5.0  $\mu$ mol, 5 mol%). The tube was capped with a Supelco aluminium crimp seal with septum (PTFE/butyl), evacuated and refilled with N<sub>2</sub> (x 3). Degassed DMSO–H<sub>2</sub>O (10:1) (1.0 mL, 0.1 M), *n*-Bu<sub>3</sub>N (48  $\mu$ L, 0.20 mmol, 2.0 equiv.), 1,1,3,3-tetramethylguanidine (25  $\mu$ L, 0.20 mmol, 2.0 equiv.) and P(OEt)<sub>3</sub> (257  $\mu$ L, 1.5 mmol, 15.0 equiv.) were sequentially added and the mixture was stirred in front of blue LEDs for 16 h at room temperature. Brine (5 mL) and EtOAc (5 mL) were added and the mixture was shaken. The aqueous layer was extracted with EtOAc (x 2), the combined organic layers were dried (MgSO<sub>4</sub>), filtered and evaporated. Purification by flash column chromatography on silica gel gave the products.

### Diethyl Phenylphosphonate (40)

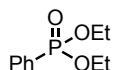

Following **GP3**, iodobenzene (11.7  $\mu$ L, 0.1 mmol) and P(OEt)<sub>3</sub> (258  $\mu$ L, 15.0 equiv., 1.5 mmol) gave **40** (21 mg, 99%) as an oil. <sup>1</sup>H NMR (400 MHz, CDCl<sub>3</sub>)  $\delta$  7.74 (2H, dd, *J* = 13.3, 6.9 Hz), 7.48 (1H, t, *J* = 7.3 Hz), 7.39 (2H, td, *J* = 7.6, 4.2 Hz), 4.15–3.99 (4H, m), 1.25 (6H, t, *J* = 7.1 Hz). Data in accordance with the literature.<sup>20</sup>

Following **GP3**, bromobenzene (10.7  $\mu$ L, 0.1 mmol) and P(OEt)<sub>3</sub> (258  $\mu$ L, 15 equiv., 1.5 mmol) gave **40** (13 mg, 60%) as an oil.

Following **GP3**, chlorobenzene (10.1  $\mu$ L, 0.1 mmol) and P(OEt)<sub>3</sub> (258  $\mu$ L, 15 equiv., 1.5 mmol) gave **40** (3 mg, 12%) as an oil.

### Diethyl (4-Cyanophenyl)phosphonate (41)

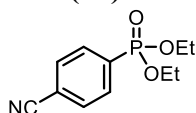

Following **GP3**, 4-iodobenzonitrile (22.9 mg, 0.1 mmol) and P(OEt)<sub>3</sub> (258  $\mu$ L, 15.0 equiv., 1.5 mmol) gave **41** (12 mg, 49%) as an oil. <sup>1</sup>H NMR (400 MHz, CDCl<sub>3</sub>)  $\delta$

7.95–7.87 (2H, m), 7.77–7.72 (2H, m), 4.24–4.05 (4H, m), 1.33 (6H, t,  $J = 7.1$  Hz).

Data in accordance with the literature.<sup>8</sup>

Following **GP3**, 4-bromobenzonitrile (18.2 mg, 0.1 mmol) and  $P(OEt)_3$  (258  $\mu$ L, 15.0 equiv., 1.5 mmol) gave **41** (9 mg, 35%) as an oil.

Following **GP3**, 4-chlorobenzonitrile (13.8 mg, 0.1 mmol) and  $P(OEt)_3$  (258  $\mu$ L, 15.0 equiv., 1.5 mmol) gave **41** (9 mg, 36%) as an oil.

#### Diethyl (4-Acetylphenyl)phosphonate (**42**)

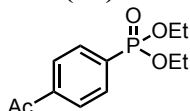

Following **GP3**, 4-iodoacetophenone (22.9 mg, 0.1 mmol) and  $P(OEt)_3$  (258  $\mu$ L, 15.0 equiv., 1.5 mmol) gave **42** (24 mg, 98%) as an oil.  $^1H$  NMR (400 MHz,  $CDCl_3$ )  $\delta$  8.01–7.86 (2H, m), 7.91–7.87 (2H, m), 4.18–4.04 (4H, m), 2.61 (3H, s), 1.30 (6H, t,  $J = 7.0$  Hz). Data in accordance with the literature.<sup>21</sup>

Following **GP3**, 4-bromoacetophenone (19.9 mg, 0.1 mmol) and triethyl phosphite (258  $\mu$ L, 15.0 equiv., 1.5 mmol) gave **43** (8 mg, 30%) as an oil.

#### Diethyl (4-Methoxyphenyl)phosphonate (**43**)

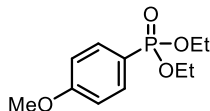

Following **GP3**, 4-iodoanisole (23.4 mg, 0.1 mmol) and  $P(OEt)_3$  (258  $\mu$ L, 15.0 equiv., 1.5 mmol) gave **43** (9 mg, 35%) as an oil.  $^1H$  NMR (400 MHz,  $CDCl_3$ )  $\delta$  7.67 (2H, dd,  $J = 12.8, 8.7$  Hz), 6.89 (2H, dd,  $J = 8.6, 3.3$  Hz), 4.14–4.00 (4H, m), 3.77 (3H, s), 1.24 (6H, t,  $J = 7.1$  Hz). Data in accordance with the literature.<sup>20</sup>

#### Dimethyl Phenylphosphonate (**44**)

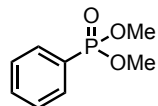

Following **GP3**, iodobenzene (11.7  $\mu$ L, 0.1 mmol) and  $P(OMe)_3$  (177  $\mu$ L, 15.0 equiv., 1.5 mmol) gave **44** (20 mg, 90%) as an oil.  $^1H$  NMR (400 MHz,  $CDCl_3$ )  $\delta$  7.79–7.74 (2H, m), 7.56–7.52 (1H, m), 7.47–7.42 (2H, m), 3.73 (6H, d,  $J = 11.1$  Hz). Data in accordance with the literature.<sup>22</sup>

### Diisopropyl Phenylphosphonate (**45**)

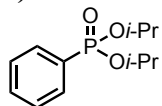

Following **GP3**, iodobenzene (11.7  $\mu$ L, 0.1 mmol) and P(O*i*-Pr)<sub>3</sub> (370  $\mu$ L, 15.0 equiv., 1.5 mmol) gave **45** (23 mg, 95%) as an oil. <sup>1</sup>H NMR (400 MHz, CDCl<sub>3</sub>)  $\delta$  7.82 – 7.76 (2H, m), 7.52–7.48 (1H, m), 7.44–7.40 (2H, m), 4.70–4.62 (2H, m), 1.34 (6H, d, *J* = 6.2 Hz), 1.20 (6H, d, *J* = 6.2 Hz). Data in accordance with the literature.<sup>22</sup>



## 6 Cyclic Voltammetry

### 6.1 General Experimental Details

Cyclic voltammetry was conducted on an EmStat (PalmSens) potentiostat using a 3-electrode cell configuration. A glassy carbon working electrode was employed alongside a platinum wire counter electrode and a Ag/AgCl reference electrode. All the solutions were degassed by bubbling N<sub>2</sub> prior to measurements. 10 mM solutions of the desired compounds were freshly prepared in dry acetonitrile along with 0.1 M of (*n*-Bu<sub>4</sub>N)(PF<sub>6</sub>) as supporting electrolyte and were examined at a scan rate of 0.1 V s<sup>-1</sup>. Ferrocene ( $E_{1/2} = +0.42$  V vs SCE)<sup>23</sup> was added at the end of the measurements as an internal standard to determine the precise potential scale. Potential values are given versus the saturated calomel electrode (SCE). Irreversible waves were obtained in all cases; therefore, the potentials were estimated at half the maximum current.<sup>24</sup>

### 6.2 Redox Potentials

Table S4.

| Entry | Substrate                                                                           | $E_{\text{red}}$ (V vs SCE) |
|-------|-------------------------------------------------------------------------------------|-----------------------------|
| 1     | 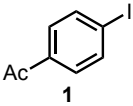 | -1.64                       |
| 2     |  | -2.17                       |

Table S5.

| Entry | Substrate                                                                           | $E_{\text{ox}}$ (V vs SCE) |
|-------|-------------------------------------------------------------------------------------|----------------------------|
| 1     | <i>n</i> -Bu <sub>3</sub> N                                                         | 0.71                       |
| 2     | TMG                                                                                 | 1.07                       |
| 3     | 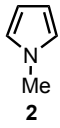 | 1.03                       |

### 6.3 Cyclic Voltammograms

Table S6.

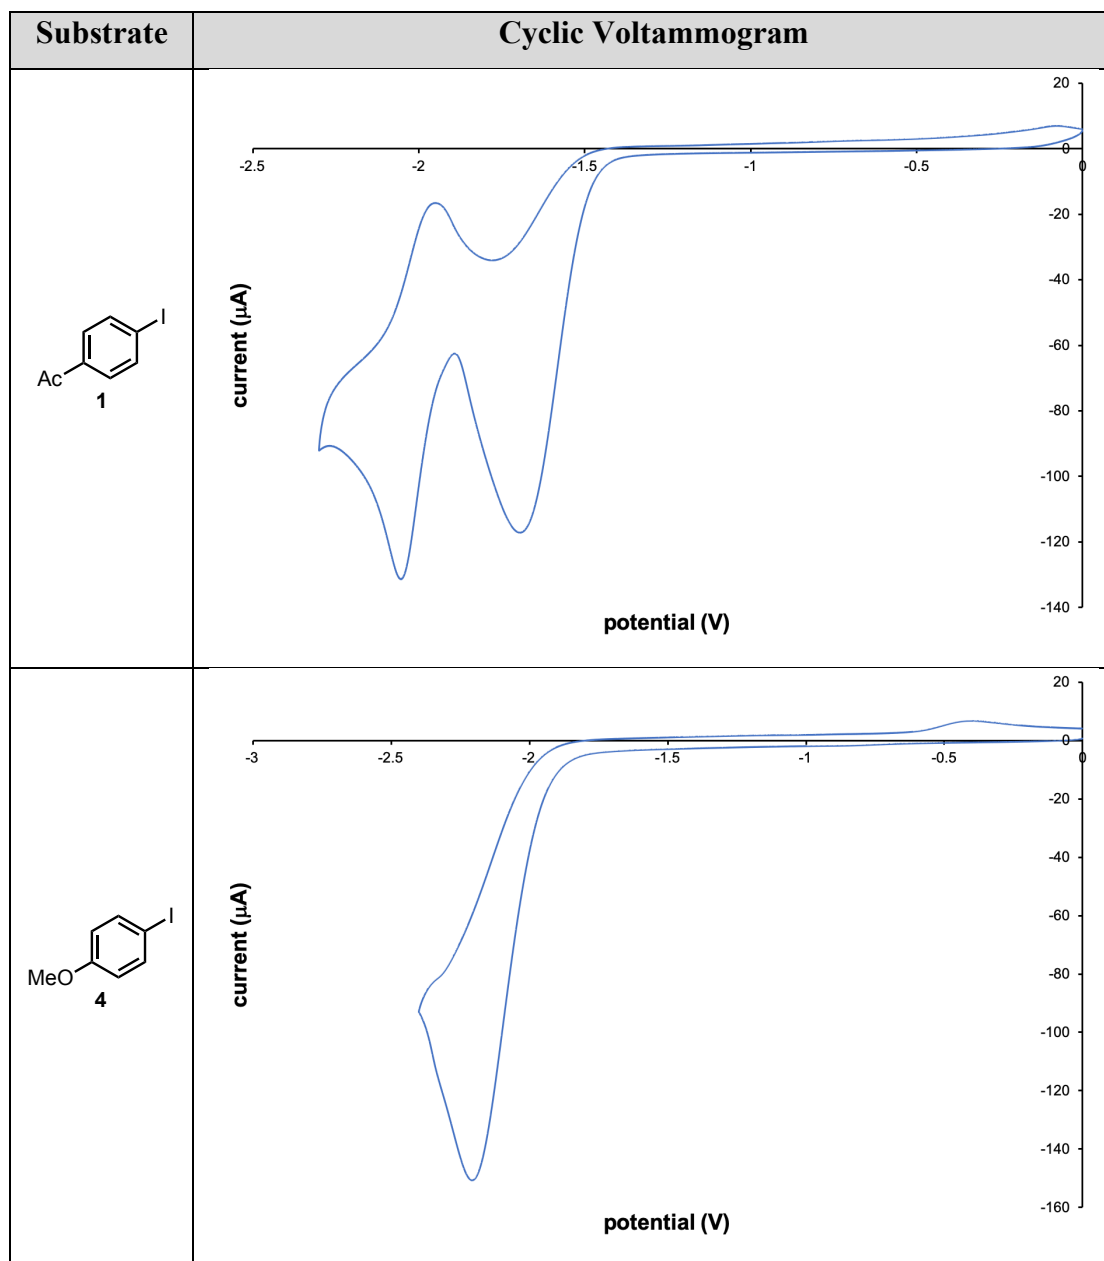

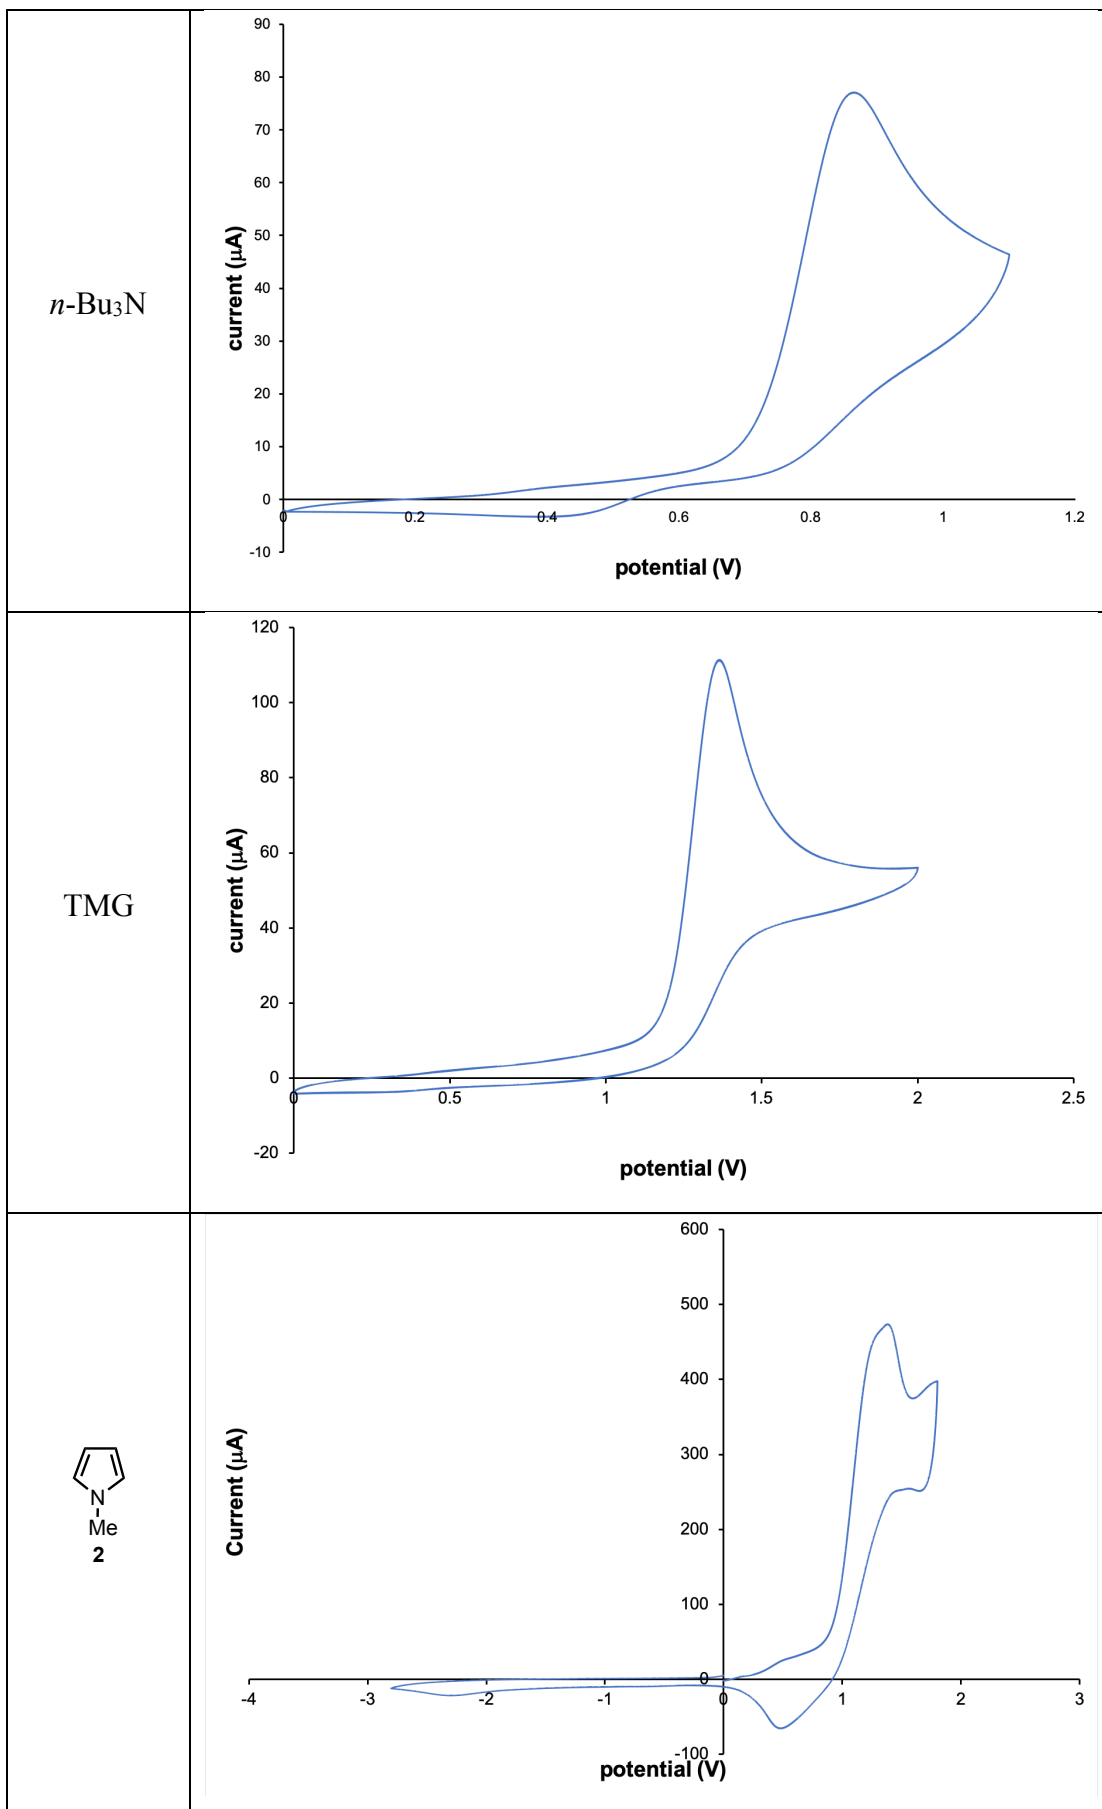

## 7 Quantum Yield Determination

### 7.1 General Experimental Details

The quantum yield of the photochemical reactions was determined at 298 K following procedures described in literature.<sup>25</sup> Degassed reaction tubes were irradiated using as the light source Blue LEDs plates ( $\lambda_{\max} = 444$  nm) for 1 min. The yield of products was determined by  $^1\text{H}$  NMR spectroscopy; in all cases the conversion was lower than 10%. The photon flux of the blue LEDs used was determined by standard ferrioxalate actinometry.<sup>26</sup>

### 7.2 Quantum Yield Determination

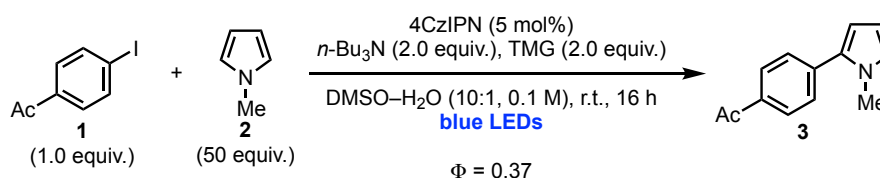

We believe the low quantum yield obtained for this reaction suggests the presence of a short-lived radical chain-propagation<sup>27</sup> or alternatively an inefficient initiation of the radical chain.<sup>28</sup>

### Intermittent Irradiation Experiments

To obtain evidences supporting an inefficient initiation process as the likely explanation for the low quantum yield observed we have run some intermittent irradiation experiments.<sup>28</sup>

The reaction shown below was subjected to short “light on–off” cycles (1 min each) and periodically monitored by  $^1\text{H}$  NMR spectroscopy.

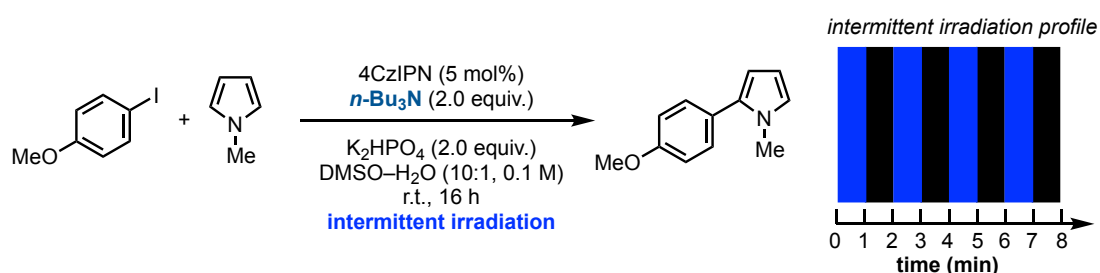

After 5 on–off cycles, 3% product formation was observed and the signals for 4CzIPN disappeared suggesting a decomposition process (at the moment we do not know how 4CzIPN might decompose under these conditions) (Figure S7). After another 10 on–off cycles, only 2% more of product was observed. The intermittent illumination was continued for other 50 cycles without any change in the reaction profile.

A control reaction under continuous irradiation was also performed and delivered 11% and 36% of product after 20 min and 60 min of irradiation respectively.

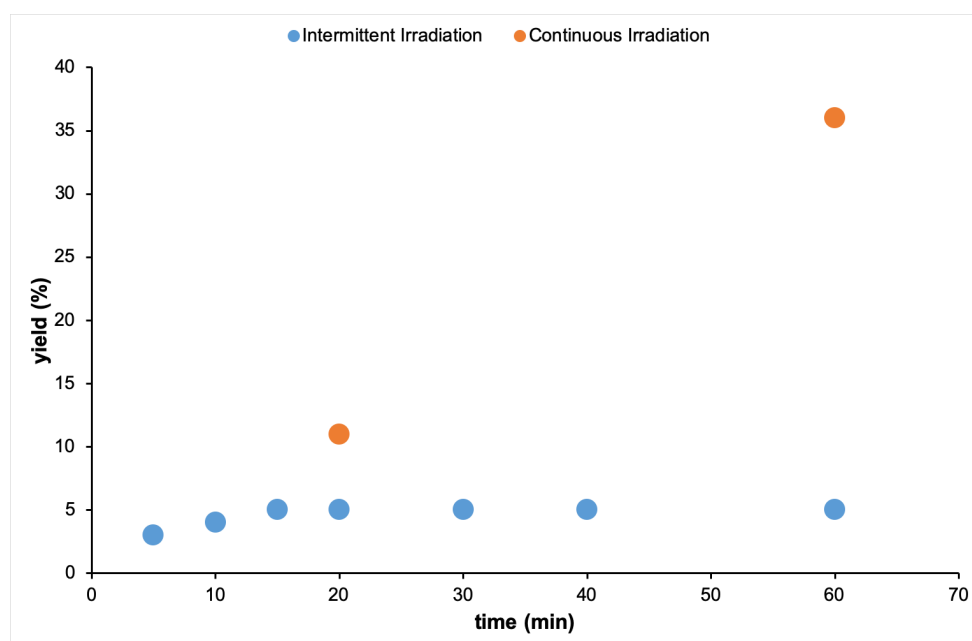

**Figure S7.**

These results support the possibility of an inefficient initiation step being responsible for the low quantum yield.

## 8 Comparison of XAT Reactions Energy Profiles

We have not been able to locate the transition state for the XAT reactions on Ph-I with the various  $\alpha$ -N,  $\alpha$ -O and  $\alpha$ -S-alkyl radicals arising from the addition to *N*-Me-pyrrole, furan and thiophene.

However, we have conducted determined the  $\Delta G^\circ$  for the individual XAT reactions. As shown in Figure S8, the one with pyrrole is by far the easiest which agrees with our proposed mechanistic analysis.

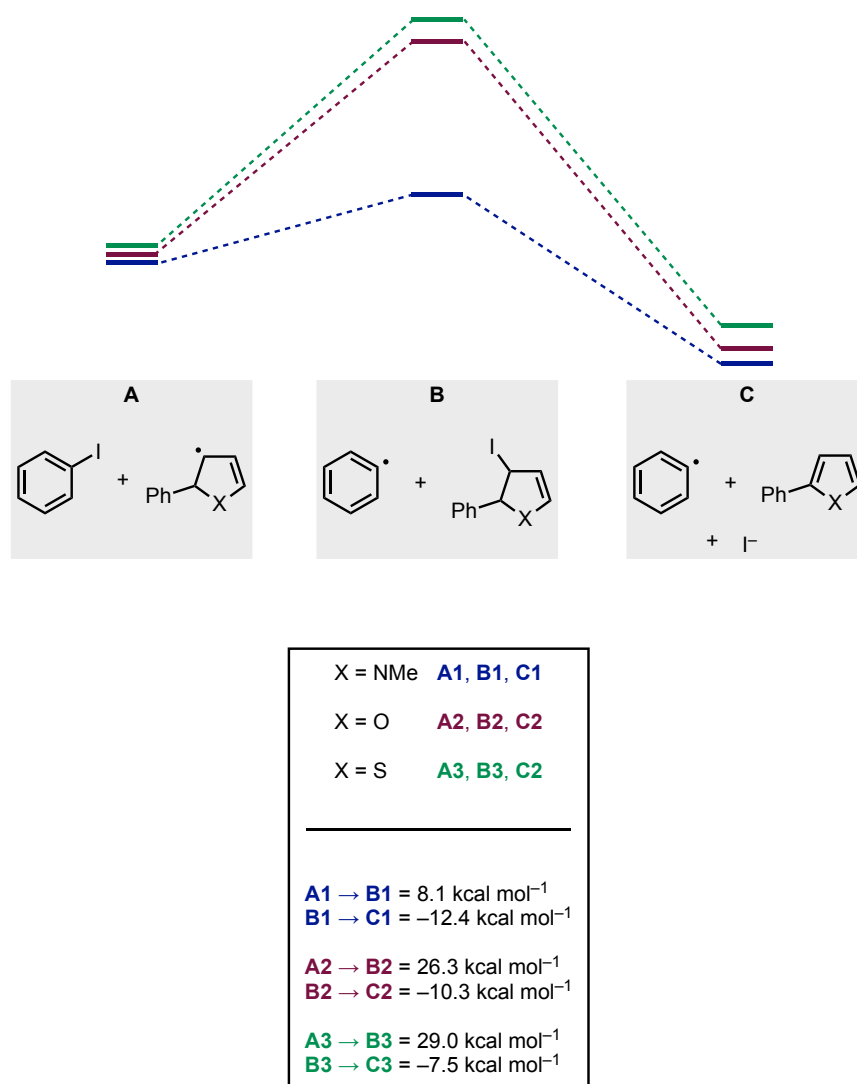

**Figure S8.**

## 9 Computational Studies

### 9.1 Computational Methods

Density functional theory (DFT)<sup>29</sup> calculations were performed using Gaussian 09 (revision E.01)<sup>30</sup> and the Gaussview<sup>31</sup> was used to generate input geometries and visualize output structures. Geometry optimizations and frequency calculations for the calculation of reaction energies were performed using the B3LYP functional<sup>32–35</sup> and an atom-pairwise dispersion correction (D3)<sup>36,37</sup> with a flexible triplet zeta basis set (def2-TZVP).<sup>38</sup> For comparative purpose and to model solvation effect, the calculations were carried out in DMSO as solvent at the same level of theory, by applying the most commonly used integral equation formalism (IEF) version of polarized continuum model (PCM).<sup>39,40</sup> For calculation of electronic properties of radicals, global and local electrophilicity index, B3LYP functional<sup>32–35</sup> was used and the geometries of studied radicals were optimized at the UB3LYP/6-311+G(d,p) level of theory, followed by frequency calculations at the same level.<sup>41</sup> The computed Hirshfeld charges on the radicals were also calculated at the same level of theory.<sup>42</sup> All stationary points were characterized as minima based on normal vibrational mode analysis. Thermal corrections were computed from unscaled frequencies, assuming a standard state of 298.15 K and 1 atm.

## 9.2 Electronic Properties of Radicals

*DFT Method:* UB3LYP/6-311+G(d,p)

| Entry | Radical                                                                             | Ionization Potential (IP, eV) | Electron affinity (EA, eV) | Electronegativity ( $\chi$ , eV) | Electronic Chemical Potential ( $\mu$ , eV) | Chemical Hardness ( $\eta$ , eV) | Chemical Softness (S, meV) | Global Electrophilicity Index ( $\omega$ , eV) | Local Electrophilicity Index ( $\omega^+_{rc}$ , eV) | Hirshfeld Charge |
|-------|-------------------------------------------------------------------------------------|-------------------------------|----------------------------|----------------------------------|---------------------------------------------|----------------------------------|----------------------------|------------------------------------------------|------------------------------------------------------|------------------|
| 1     | 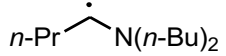   | 5.41                          | -0.95                      | 2.23                             | -2.23                                       | 6.36                             | 157.30                     | 0.39                                           | 0.13                                                 | -0.0432          |
| 2     |    | 5.89                          | 0.27                       | 3.08                             | -3.08                                       | 5.62                             | 177.87                     | 0.84                                           | 0.15                                                 | -0.0368          |
| 3     |    | 5.73                          | -0.15                      | 2.79                             | -2.79                                       | 5.88                             | 170.01                     | 0.66                                           | 0.16                                                 | -0.0389          |
| 4     |   | 5.99                          | 0.24                       | 3.12                             | -3.12                                       | 5.75                             | 173.92                     | 0.85                                           | 0.17                                                 | -0.0302          |
| 5     |  | 6.51                          | -0.01                      | 3.25                             | -3.25                                       | 6.52                             | 153.31                     | 0.81                                           | 0.26                                                 | -0.0213          |



|   |                                                                                   |      |      |      |       |      |        |      |      |         |
|---|-----------------------------------------------------------------------------------|------|------|------|-------|------|--------|------|------|---------|
| 6 |  | 6.81 | 0.40 | 3.60 | -3.60 | 6.40 | 156.15 | 1.01 | 0.26 | -0.0120 |
| 7 |  | 6.55 | 0.32 | 3.43 | -3.43 | 6.23 | 160.45 | 0.94 | 0.30 | -0.0119 |
| 8 |  | 6.65 | 0.49 | 3.57 | -3.57 | 6.15 | 162.51 | 1.04 | 0.32 | -0.0121 |

Computed Energies [values are in Hartree]

| Entry | Species                                                                             | Total Electronic Energy | Sum of Electronic and Zero-point Energies | Sum of Electronic and Thermal Enthalpies | Gibbs Free Energy |
|-------|-------------------------------------------------------------------------------------|-------------------------|-------------------------------------------|------------------------------------------|-------------------|
| 1     | 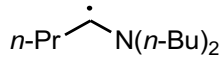   | -527.7944891            | -527.433485                               | -527.414559                              | -527.482521       |
| 2     |    | -633.9035981            | -633.667107                               | -633.652006                              | -633.709951       |
| 3     |    | -481.2127423            | -481.013307                               | -481.001826                              | -481.050913       |
| 4     |    | -573.478742             | -573.280569                               | -573.267290                              | -573.320746       |
| 5     |    | -461.7612287            | -461.601850                               | -461.592112                              | -461.637664       |
| 6     |  | -554.0267894            | -553.868680                               | -553.857213                              | -553.906494       |
| 7     |  | -784.7472348            | -784.590794                               | -784.580572                              | -784.627214       |
| 8     |  | -877.0091731            | -876.854098                               | -876.842152                              | -876.892366       |

## Optimized Structures and Cartesian Coordinates

| Entry                 | Species                                                                                                                    | Optimized Structure                                                                  |             |
|-----------------------|----------------------------------------------------------------------------------------------------------------------------|--------------------------------------------------------------------------------------|-------------|
| 1                     | 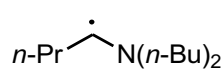 <chem>CCCC[N+](CCCC)(CCCC)C</chem>       |    |             |
| Cartesian Coordinates |                                                                                                                            |                                                                                      |             |
| C                     | 0.62661700                                                                                                                 | -1.22517200                                                                          | -0.48093500 |
| N                     | -0.27220500                                                                                                                | -0.27531300                                                                          | 0.00205700  |
| C                     | -1.56932100                                                                                                                | -0.15119400                                                                          | -0.65966200 |
| H                     | -1.57261500                                                                                                                | -0.80440200                                                                          | -1.53695700 |
| H                     | -1.69830200                                                                                                                | 0.87065600                                                                           | -1.04191200 |
| C                     | -2.74948800                                                                                                                | -0.51109400                                                                          | 0.25234500  |
| H                     | -2.72875500                                                                                                                | 0.12550600                                                                           | 1.14523200  |
| H                     | -2.61695700                                                                                                                | -1.54036000                                                                          | 0.60475800  |
| C                     | 0.22497500                                                                                                                 | 0.92046500                                                                           | 0.67809500  |
| H                     | -0.62480600                                                                                                                | 1.40061400                                                                           | 1.17415600  |
| H                     | 0.90897700                                                                                                                 | 0.61515300                                                                           | 1.47541400  |
| C                     | 1.87778900                                                                                                                 | -1.55619800                                                                          | 0.27486000  |
| H                     | 1.64264200                                                                                                                 | -1.90348600                                                                          | 1.29895300  |
| H                     | 2.50562200                                                                                                                 | -0.66427900                                                                          | 0.40961200  |
| C                     | 0.92877900                                                                                                                 | 1.93608100                                                                           | -0.23916900 |
| H                     | 0.24098000                                                                                                                 | 2.24900700                                                                           | -1.03393200 |
| H                     | 1.76727000                                                                                                                 | 1.43885900                                                                           | -0.73891400 |
| H                     | 0.15777500                                                                                                                 | -2.02473600                                                                          | -1.04565000 |
| C                     | -4.10638500                                                                                                                | -0.36778400                                                                          | -0.44608000 |
| H                     | -4.11982700                                                                                                                | -0.99796600                                                                          | -1.34399600 |
| H                     | -4.22695200                                                                                                                | 0.66406400                                                                           | -0.79866200 |
| C                     | -5.28940200                                                                                                                | -0.73962200                                                                          | 0.45253200  |
| H                     | -6.24121000                                                                                                                | -0.63028800                                                                          | -0.07470500 |
| H                     | -5.21555200                                                                                                                | -1.77696900                                                                          | 0.79348600  |
| H                     | -5.32692500                                                                                                                | -0.10205600                                                                          | 1.34146900  |
| C                     | 1.42780000                                                                                                                 | 3.16918100                                                                           | 0.52099400  |
| H                     | 0.58117500                                                                                                                 | 3.65581600                                                                           | 1.02167100  |
| H                     | 2.10924700                                                                                                                 | 2.85085500                                                                           | 1.31975500  |
| C                     | 2.13913000                                                                                                                 | 4.18619700                                                                           | -0.37640300 |
| H                     | 2.48269600                                                                                                                 | 5.05234000                                                                           | 0.19615800  |
| H                     | 3.01273600                                                                                                                 | 3.74093900                                                                           | -0.86244100 |
| H                     | 1.47370300                                                                                                                 | 4.55175600                                                                           | -1.16484400 |
| C                     | 2.71336100                                                                                                                 | -2.63634400                                                                          | -0.42655700 |
| H                     | 2.10294100                                                                                                                 | -3.53928800                                                                          | -0.54719600 |
| H                     | 2.95872600                                                                                                                 | -2.29521200                                                                          | -1.43832500 |
| C                     | 3.99874100                                                                                                                 | -2.98742000                                                                          | 0.32712200  |
| H                     | 4.57013400                                                                                                                 | -3.75846800                                                                          | -0.19736900 |
| H                     | 4.64629500                                                                                                                 | -2.11123000                                                                          | 0.43467400  |
| H                     | 3.78084200                                                                                                                 | -3.36222300                                                                          | 1.33231000  |
| 2                     |  <chem>CC(=O)c1ccc(cc1)c2cc[nH]2</chem> |  |             |
| Cartesian Coordinates |                                                                                                                            |                                                                                      |             |
| C                     | 2.01798900                                                                                                                 | 0.70210000                                                                           | -0.00061300 |
| C                     | 2.62720400                                                                                                                 | 0.80502300                                                                           | -1.38151900 |
| N                     | 2.82216800                                                                                                                 | -0.36977700                                                                          | 0.61441500  |
| C                     | 3.74699000                                                                                                                 | -0.00291400                                                                          | -1.43396200 |
| C                     | 3.89032800                                                                                                                 | -0.66669000                                                                          | -0.21452600 |
| H                     | 4.40237400                                                                                                                 | -0.13263500                                                                          | -2.28326600 |
| H                     | 4.64137800                                                                                                                 | -1.37839500                                                                          | 0.09303500  |



|                       |                                                                                     |                                                                                                                                                                                                                                                                                                                                                                                                                                                                                                                                                                                                                                                                                                                                                                                                                                                                                      |
|-----------------------|-------------------------------------------------------------------------------------|--------------------------------------------------------------------------------------------------------------------------------------------------------------------------------------------------------------------------------------------------------------------------------------------------------------------------------------------------------------------------------------------------------------------------------------------------------------------------------------------------------------------------------------------------------------------------------------------------------------------------------------------------------------------------------------------------------------------------------------------------------------------------------------------------------------------------------------------------------------------------------------|
|                       |                                                                                     | <pre> C      2.05889400 -0.26828800  2.06556400 H      1.10253800 -0.54550800  2.51481300 H      2.81351200 -0.97855800  2.40832300 H      2.33475200  0.73505200  2.42297400 H      0.98720300  1.10928700 -2.26602500 H      0.84184700  1.45358500  0.42972700 C     -0.44595100 -0.19111900 -0.05077500 C     -1.62486400  0.57469200  0.03100700 C     -0.56681100 -1.57689000 -0.16896400 C     -2.88605700 -0.04413900 -0.01215900 C     -1.81515000 -2.18976900 -0.20405500 H      0.33756900 -2.17031600 -0.22869500 C     -2.97936300 -1.42334100 -0.12840800 H     -3.77765700  0.56758100  0.05138400 H     -1.88202200 -3.26833400 -0.29257800 H     -3.95252500 -1.89886800 -0.15764300 C     -1.57074700  2.00088600  0.16027300 N     -1.55385600  3.15247100  0.26290200 </pre>                                                                                     |
| 5                     | 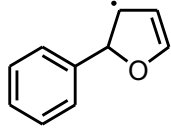   |                                                                                                                                                                                                                                                                                                                                                                                                                                                                                                                                                                                                                                                                                                                                                                                                    |
| Cartesian Coordinates |                                                                                     |                                                                                                                                                                                                                                                                                                                                                                                                                                                                                                                                                                                                                                                                                                                                                                                                                                                                                      |
|                       |                                                                                     | <pre> C      1.01287300 -0.74597700  0.17440500 C      1.86242200 -0.05192000  1.20393600 O      1.70868100 -0.46310900 -1.08902500 C      2.94564300  0.51619300  0.55584700 H      1.63346000 -0.03726800  2.25818100 C      2.82939900  0.25223300 -0.79902800 H      3.74972400  1.07887000  1.00741700 H      3.44915700  0.52579500 -1.63796100 H      1.03765200 -1.83950200  0.29060700 C     -0.43813000 -0.31149400  0.08494700 C     -1.45819700 -1.26368700  0.09413100 C     -0.77356900  1.04354400 -0.00762700 C     -2.79563300 -0.87384600  0.01777200 H     -1.20581400 -2.31734800  0.15977600 C     -2.10590900  1.43479900 -0.09288300 H      0.01338200  1.78949500 -0.01122000 C     -3.12117600  0.47647900 -0.07744700 H     -3.57867100 -1.62378800  0.02864800 H     -2.35538400  2.48743900 -0.16785800 H     -4.15929700  0.78322600 -0.13971600 </pre> |
| 6                     |  |                                                                                                                                                                                                                                                                                                                                                                                                                                                                                                                                                                                                                                                                                                                                                                                                  |
| Cartesian Coordinates |                                                                                     |                                                                                                                                                                                                                                                                                                                                                                                                                                                                                                                                                                                                                                                                                                                                                                                                                                                                                      |
|                       |                                                                                     | <pre> C     -1.11038800  0.34382300 -0.43244800 C     -1.81393300  0.81214900  0.81760100 O     -2.00299600 -0.66185500 -0.98103400 C     -3.01277900  0.12768400  0.90453800 H     -1.42463600  1.57190400  1.47650000 C     -3.10577800 -0.73128300 -0.17642700 H     -3.76167800  0.23132400  1.67587900 H     -3.86958100 -1.42786100 -0.48141400 H     -1.03396300  1.14494000 -1.18199500 C      0.27510800 -0.24190800 -0.20017100 C      1.38855400  0.61079000 -0.06247400 C      0.47435700 -1.61692600 -0.09206600 C      2.66470200  0.08419800  0.18835800 C      1.74323900 -2.13707700  0.15304900 H     -0.37258500 -2.27870400 -0.21526600 C      2.84025400 -1.28891500  0.29635600 H      3.50476700  0.76006700  0.29108300 H      1.87528700 -3.21041500  0.22917200 </pre>                                                                                     |

|                       |                                                                                     |                                                                                      |             |
|-----------------------|-------------------------------------------------------------------------------------|--------------------------------------------------------------------------------------|-------------|
| H                     | 3.82689700                                                                          | -1.69419800                                                                          | 0.48617400  |
| C                     | 1.23625800                                                                          | 2.03037600                                                                           | -0.17193300 |
| N                     | 1.11455600                                                                          | 3.17718800                                                                           | -0.25402300 |
| 7                     | 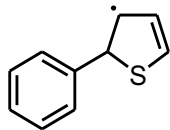   |    |             |
| Cartesian Coordinates |                                                                                     |                                                                                      |             |
| C                     | 0.76124500                                                                          | -0.45898800                                                                          | 0.64647900  |
| C                     | 1.53475600                                                                          | 0.68180700                                                                           | 1.25293700  |
| C                     | 2.70726600                                                                          | 1.00932700                                                                           | 0.61264800  |
| H                     | 1.15563800                                                                          | 1.17842400                                                                           | 2.13667100  |
| C                     | 2.99636700                                                                          | 0.24515900                                                                           | -0.51845500 |
| H                     | 3.36393700                                                                          | 1.80362200                                                                           | 0.94817900  |
| H                     | 3.85017400                                                                          | 0.34409100                                                                           | -1.17189300 |
| H                     | 0.77979600                                                                          | -1.33139800                                                                          | 1.31022400  |
| C                     | -0.68489800                                                                         | -0.16467800                                                                          | 0.29657000  |
| C                     | -1.68867400                                                                         | -1.07305800                                                                          | 0.64227700  |
| C                     | -1.04103700                                                                         | 1.01173700                                                                           | -0.37300500 |
| C                     | -3.02310800                                                                         | -0.81485500                                                                          | 0.32853000  |
| H                     | -1.42564300                                                                         | -1.98915100                                                                          | 1.16189600  |
| C                     | -2.37125800                                                                         | 1.27219800                                                                           | -0.68570000 |
| H                     | -0.26919000                                                                         | 1.72194400                                                                           | -0.64835400 |
| C                     | -3.36759600                                                                         | 0.35893600                                                                           | -0.33634800 |
| H                     | -3.78988600                                                                         | -1.53004500                                                                          | 0.60474300  |
| H                     | -2.63303500                                                                         | 2.18833600                                                                           | -1.20346500 |
| H                     | -4.40387500                                                                         | 0.56312700                                                                           | -0.58101800 |
| S                     | 1.77710700                                                                          | -0.95965300                                                                          | -0.85953700 |
| 8                     |  |  |             |
| Cartesian Coordinates |                                                                                     |                                                                                      |             |
| C                     | 0.70518600                                                                          | -0.99908900                                                                          | 0.39975700  |
| C                     | 1.50886400                                                                          | -0.27506700                                                                          | 1.44733900  |
| C                     | 2.73913400                                                                          | 0.17783700                                                                           | 1.02981900  |
| H                     | 1.11827300                                                                          | -0.16699000                                                                          | 2.45070700  |
| C                     | 3.02870200                                                                          | -0.05174500                                                                          | -0.31222500 |
| H                     | 3.43007900                                                                          | 0.69889300                                                                           | 1.68134100  |
| H                     | 3.91217700                                                                          | 0.25357100                                                                           | -0.85216100 |
| H                     | 0.67191200                                                                          | -2.07072600                                                                          | 0.62980500  |
| C                     | -0.73070300                                                                         | -0.54887100                                                                          | 0.20307000  |
| C                     | -1.74645600                                                                         | -1.50665300                                                                          | 0.24770500  |
| C                     | -1.10152900                                                                         | 0.79512300                                                                           | -0.01851300 |
| C                     | -3.08650400                                                                         | -1.16210900                                                                          | 0.08557000  |
| H                     | -1.47845700                                                                         | -2.54445100                                                                          | 0.41416300  |
| C                     | -2.45179200                                                                         | 1.14045800                                                                           | -0.17949900 |
| C                     | -3.44186900                                                                         | 0.16668400                                                                           | -0.12788200 |
| H                     | -3.84887500                                                                         | -1.93157900                                                                          | 0.12616400  |
| H                     | -2.70978300                                                                         | 2.17886600                                                                           | -0.34753400 |
| H                     | -4.48109200                                                                         | 0.44543700                                                                           | -0.25490400 |
| S                     | 1.73487400                                                                          | -0.86260700                                                                          | -1.16476000 |
| C                     | -0.14236500                                                                         | 1.85692300                                                                           | -0.09887700 |
| N                     | 0.56339600                                                                          | 2.76825000                                                                           | -0.18128800 |

### 9.3 Reaction Energies ( $\Delta G^\circ$ )

**DFT Method:** B3LYP-D3/def2-TZVP [solvent: DMSO, values are in Kcal mol<sup>-1</sup>]

| Entry | Reaction                                                                             | $\Delta G$ |
|-------|--------------------------------------------------------------------------------------|------------|
| 1     | 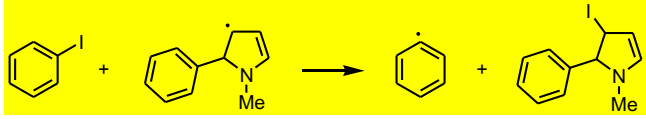   | 8.1        |
| 2     |    | -12.4      |
| 3     |    | -12.5      |
| 4     |   | 26.3       |
| 5     |  | -10.3      |
| 6     |  | 29.0       |
| 7     |  | -7.5       |
| 8     |  | 12.9       |

Computed Energies [values are in Hartree]

| Entry | Species                                                                             | Total Electronic Energy | Sum of Electronic and Zero-point Energies | Sum of Electronic and Thermal Enthalpies | Gibbs Free Energy |
|-------|-------------------------------------------------------------------------------------|-------------------------|-------------------------------------------|------------------------------------------|-------------------|
| 1     | 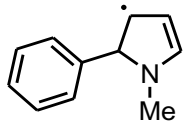   | -481.2882338            | -481.088470                               | -481.076992                              | -481.126063       |
| 2     | PhI                                                                                 | -529.5451257            | -529.455249                               | -529.448427                              | -529.486987       |
| 3     | <i>n</i> -Bu <sub>3</sub> N                                                         | -528.5313195            | -528.155647                               | -528.137231                              | -528.202577       |
| 4     |    | -480.7374963            | -480.546020                               | -480.535277                              | -480.581465       |
| 5     | Ph <sup>•</sup>                                                                     | -231.6555749            | -231.568454                               | -231.563134                              | -231.596490       |
| 6     | <i>n</i> -Bu <sub>3</sub> NH <sup>+</sup> I <sup>-</sup>                            | -826.9963739            | -826.603619                               | -826.582681                              | -826.657460       |
| 7     |    | -461.8329               | -461.673296                               | -461.663586                              | -461.708945       |
| 8     |   | -461.2764966            | -461.125862                               | -461.116685                              | -461.160939       |
| 9     |  | -784.8150757            | -784.658346                               | -784.648165                              | -784.694669       |
| 10    |  | -784.2552308            | -784.107650                               | -784.098105                              | -784.142310       |
| 11    |  | -634.0065281            | -633.769590                               | -633.754539                              | -633.812542       |
| 12    |  | -682.2619762            | -682.134991                               | -682.124607                              | -682.172056       |
| 13    |  | -633.4565404            | -633.227775                               | -633.213515                              | -633.268439       |
| 14    |  | -384.3724134            | -384.247903                               | -384.239205                              | -384.281257       |
| 15    |  | -779.1643514            | -778.960429                               | -778.946926                              | -779.003707       |



|    |                                                                                   |              |              |              |              |
|----|-----------------------------------------------------------------------------------|--------------|--------------|--------------|--------------|
| 16 |  | -759.6749764 | -759.511434  | -759.500247  | -759.550608  |
| 17 |  | -1082.658983 | -1082.498824 | -1082.487033 | -1082.538952 |
| 18 |  | -825.7770994 | -825.409988  | -825.389445  | -825.462680  |
| 19 |  | -527.8792386 | -527.516855  | -527.498354  | -527.564408  |

## Optimized Structures and Cartesian Coordinates

| Entry                                                                                                                                                                                                                                                                                                                                                                                                                                                                                                                                                                                                                                                                                                                                                                                                                                                                                                                                                                                                   | Species                                                                           | Optimized Structure                                                                  |
|---------------------------------------------------------------------------------------------------------------------------------------------------------------------------------------------------------------------------------------------------------------------------------------------------------------------------------------------------------------------------------------------------------------------------------------------------------------------------------------------------------------------------------------------------------------------------------------------------------------------------------------------------------------------------------------------------------------------------------------------------------------------------------------------------------------------------------------------------------------------------------------------------------------------------------------------------------------------------------------------------------|-----------------------------------------------------------------------------------|--------------------------------------------------------------------------------------|
| 1                                                                                                                                                                                                                                                                                                                                                                                                                                                                                                                                                                                                                                                                                                                                                                                                                                                                                                                                                                                                       | 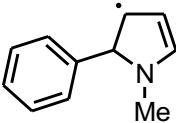 |    |
| Cartesian Coordinates<br>C -0.84208300 -0.36979900 0.60940000<br>C -1.45487300 -1.62288900 0.03161900<br>N -1.73112900 0.67528500 0.08515600<br>C -2.63506000 -1.28750900 -0.60142700<br>C -2.81836600 0.09225400 -0.52415000<br>H -3.30682900 -1.96628100 -1.10502800<br>H -3.62194400 0.69861800 -0.91020900<br>C -1.75587400 1.97830100 0.70481900<br>H -0.74818000 2.39591000 0.72590100<br>H -2.39335900 2.64659100 0.12698300<br>H -2.13441700 1.93610300 1.73508400<br>H -1.01394100 -2.59983000 0.14475100<br>H -0.91133400 -0.37588900 1.71402800<br>C 0.62105300 -0.15859300 0.25041000<br>C 1.62175300 -0.48867200 1.16193600<br>C 0.98543000 0.32354800 -1.00693500<br>C 2.96517500 -0.35033800 0.82281000<br>H 1.34916900 -0.85342300 2.14587900<br>C 2.32508800 0.47171400 -1.34582600<br>H 0.21071900 0.58936500 -1.71522000<br>C 3.32067500 0.13114200 -0.43261100<br>H 3.73188300 -0.61117900 1.54183800<br>H 2.59423300 0.85253100 -2.32340200<br>H 4.36440600 0.24552600 -0.69695900 |                                                                                   |                                                                                      |
| 2                                                                                                                                                                                                                                                                                                                                                                                                                                                                                                                                                                                                                                                                                                                                                                                                                                                                                                                                                                                                       | PhI                                                                               |  |
| Cartesian Coordinates<br>I 2.92864432 0.37369519 -0.18216464<br>C 0.80776032 0.37367519 -0.18216464<br>C 0.12510832 1.58530619 -0.18215464<br>C 0.12510132 -0.83791681 -0.18217264<br>C -1.26709768 1.57693719 -0.18217364<br>H 0.66201632 2.52364819 -0.18215864<br>C -1.26713468 -0.82952981 -0.18215664<br>H 0.66195932 -1.77628781 -0.18217664<br>C -1.96489968 0.37370019 -0.18216364<br>H -1.80207268 2.51814219 -0.18217464<br>H -1.80208768 -1.77074581 -0.18215564<br>H -3.04706768 0.37372919 -0.18216764                                                                                                                                                                                                                                                                                                                                                                                                                                                                                     |                                                                                   |                                                                                      |
| 3                                                                                                                                                                                                                                                                                                                                                                                                                                                                                                                                                                                                                                                                                                                                                                                                                                                                                                                                                                                                       | <i>n</i> -Bu <sub>3</sub> N                                                       |  |
| Cartesian Coordinates                                                                                                                                                                                                                                                                                                                                                                                                                                                                                                                                                                                                                                                                                                                                                                                                                                                                                                                                                                                   |                                                                                   |                                                                                      |

|                       |                                                                                     |                                                                                      |             |
|-----------------------|-------------------------------------------------------------------------------------|--------------------------------------------------------------------------------------|-------------|
| C                     | -1.64115908                                                                         | -0.36164684                                                                          | -0.08815116 |
| N                     | -0.46748508                                                                         | 0.32068616                                                                           | 0.46106484  |
| C                     | 0.59394692                                                                          | -0.60565284                                                                          | 0.86415384  |
| H                     | 0.14483792                                                                          | -1.32914784                                                                          | 1.55103084  |
| H                     | 1.33137192                                                                          | -0.05240684                                                                          | 1.45098184  |
| C                     | 1.32063192                                                                          | -1.36834284                                                                          | -0.25232816 |
| H                     | 1.82184692                                                                          | -0.66222784                                                                          | -0.92181916 |
| H                     | 0.59376892                                                                          | -1.91365984                                                                          | -0.86283216 |
| C                     | -0.02001708                                                                         | 1.41672116                                                                           | -0.39972216 |
| H                     | 0.31576792                                                                          | 1.04736516                                                                           | -1.38467316 |
| H                     | -0.88525108                                                                         | 2.05261416                                                                           | -0.59722216 |
| C                     | -2.94726808                                                                         | 0.40274516                                                                           | 0.12375984  |
| H                     | -2.89234808                                                                         | 1.38741816                                                                           | -0.34942616 |
| H                     | -3.07842508                                                                         | 0.57928316                                                                           | 1.19609084  |
| C                     | 1.07856592                                                                          | 2.28404316                                                                           | 0.20797284  |
| H                     | 2.00578392                                                                          | 1.71141816                                                                           | 0.30274984  |
| H                     | 0.78387192                                                                          | 2.57373816                                                                           | 1.22196284  |
| H                     | -1.72826608                                                                         | -1.33108684                                                                          | 0.40954984  |
| H                     | -1.51949008                                                                         | -0.57751884                                                                          | -1.16344616 |
| C                     | -4.15975408                                                                         | -0.34492384                                                                          | -0.43049516 |
| H                     | -4.22127708                                                                         | -1.33269184                                                                          | 0.03887384  |
| H                     | -4.01552408                                                                         | -0.52402584                                                                          | -1.50122416 |
| C                     | -5.47166708                                                                         | 0.40641116                                                                           | -0.21195916 |
| H                     | -5.44805108                                                                         | 1.38458516                                                                           | -0.69939916 |
| H                     | -6.32202508                                                                         | -0.14734484                                                                          | -0.61543516 |
| H                     | -5.65513808                                                                         | 0.57189116                                                                           | 0.85283784  |
| C                     | 2.35417992                                                                          | -2.34950484                                                                          | 0.29931284  |
| H                     | 1.85468892                                                                          | -3.06549484                                                                          | 0.96077084  |
| H                     | 3.07061692                                                                          | -1.80501484                                                                          | 0.92390584  |
| C                     | 3.10402492                                                                          | -3.10455284                                                                          | -0.79666516 |
| H                     | 3.83265292                                                                          | -3.80177984                                                                          | -0.37744416 |
| H                     | 2.41213092                                                                          | -3.67773984                                                                          | -1.41938616 |
| H                     | 3.64102792                                                                          | -2.41237284                                                                          | -1.45055616 |
| C                     | 1.35736492                                                                          | 3.53459616                                                                           | -0.62528416 |
| H                     | 0.44234992                                                                          | 4.13152016                                                                           | -0.69950116 |
| H                     | 1.61342092                                                                          | 3.23779816                                                                           | -1.64789116 |
| C                     | 2.48136992                                                                          | 4.39202916                                                                           | -0.04665516 |
| H                     | 3.41669092                                                                          | 3.82859016                                                                           | 0.00412684  |
| H                     | 2.65954992                                                                          | 5.28161816                                                                           | -0.65433616 |
| H                     | 2.23895692                                                                          | 4.72236716                                                                           | 0.96681184  |
| 4                     | 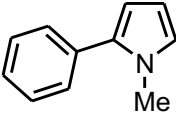 |  |             |
| Cartesian Coordinates |                                                                                     |                                                                                      |             |
| C                     | 0.60229400                                                                          | -0.17962600                                                                          | 0.04723900  |
| C                     | 1.24225900                                                                          | 0.95041300                                                                           | 0.57544800  |
| C                     | 1.40283700                                                                          | -1.19747300                                                                          | -0.49259800 |
| C                     | 2.62736600                                                                          | 1.06288200                                                                           | 0.55187500  |
| H                     | 0.65781800                                                                          | 1.73694500                                                                           | 1.03246200  |
| C                     | 2.78714000                                                                          | -1.08930100                                                                          | -0.50409000 |
| H                     | 0.92778000                                                                          | -2.07315500                                                                          | -0.91591100 |
| C                     | 3.40766500                                                                          | 0.04487400                                                                           | 0.01287600  |
| H                     | 3.09807800                                                                          | 1.94495000                                                                           | 0.96793000  |
| H                     | 3.38273600                                                                          | -1.88804600                                                                          | -0.92841000 |
| H                     | 4.48644600                                                                          | 0.13315500                                                                           | -0.00274600 |
| C                     | -0.85224500                                                                         | -0.35345500                                                                          | 0.08628100  |
| C                     | -1.56452700                                                                         | -1.50624400                                                                          | 0.37862000  |
| N                     | -1.77473500                                                                         | 0.64659600                                                                           | -0.16035400 |
| C                     | -2.94292700                                                                         | -1.19534800                                                                          | 0.31585400  |
| H                     | -1.12267900                                                                         | -2.45520800                                                                          | 0.63599100  |
| C                     | -3.03824400                                                                         | 0.13550400                                                                           | -0.02300700 |
| H                     | -3.76985300                                                                         | -1.86220200                                                                          | 0.49833100  |
| H                     | -3.90080600                                                                         | 0.75815400                                                                           | -0.19246600 |
| C                     | -1.50625600                                                                         | 2.01066600                                                                           | -0.58979700 |
| H                     | -0.61577500                                                                         | 2.03707800                                                                           | -1.21371400 |
| H                     | -2.35238500                                                                         | 2.36802200                                                                           | -1.17290700 |
| H                     | -1.36039700                                                                         | 2.67678000                                                                           | 0.26172200  |

|                                                                                                                                                                                                                                                                                                                                                                                                                                                                                                                                                                                                                                                                                                                                                                                                                                                                                                                                                                                                                                                                                                                                                                                                                                                                                                                                                                                                                                                                                                                                                                                                                                                                                                                                                                                                                                                                                                                                                                                                                                                                                                                                                                                                                                                                                                                                                                                                                                                                                                                                                                                                                                                                                                                                                                                                                                                                                                                                                                                                                                                                                                                                                                                                                                           |                                                          |                                                                                     |             |             |             |             |   |            |             |            |   |             |             |             |   |            |            |             |   |            |             |            |   |             |             |            |   |             |             |             |   |             |             |            |   |            |            |             |   |             |            |             |   |            |            |             |   |             |            |            |   |             |            |             |   |             |            |            |   |            |            |             |   |            |            |             |   |            |            |             |   |             |            |            |   |             |            |            |   |            |            |            |   |             |             |             |   |            |             |            |   |            |             |            |   |            |             |            |   |            |             |            |   |            |             |            |   |            |             |            |   |            |             |            |   |            |            |             |   |            |            |             |   |            |            |             |   |            |            |             |   |            |            |             |   |            |            |             |   |            |            |             |   |             |            |            |   |             |            |            |   |             |            |            |   |             |            |            |
|-------------------------------------------------------------------------------------------------------------------------------------------------------------------------------------------------------------------------------------------------------------------------------------------------------------------------------------------------------------------------------------------------------------------------------------------------------------------------------------------------------------------------------------------------------------------------------------------------------------------------------------------------------------------------------------------------------------------------------------------------------------------------------------------------------------------------------------------------------------------------------------------------------------------------------------------------------------------------------------------------------------------------------------------------------------------------------------------------------------------------------------------------------------------------------------------------------------------------------------------------------------------------------------------------------------------------------------------------------------------------------------------------------------------------------------------------------------------------------------------------------------------------------------------------------------------------------------------------------------------------------------------------------------------------------------------------------------------------------------------------------------------------------------------------------------------------------------------------------------------------------------------------------------------------------------------------------------------------------------------------------------------------------------------------------------------------------------------------------------------------------------------------------------------------------------------------------------------------------------------------------------------------------------------------------------------------------------------------------------------------------------------------------------------------------------------------------------------------------------------------------------------------------------------------------------------------------------------------------------------------------------------------------------------------------------------------------------------------------------------------------------------------------------------------------------------------------------------------------------------------------------------------------------------------------------------------------------------------------------------------------------------------------------------------------------------------------------------------------------------------------------------------------------------------------------------------------------------------------------------|----------------------------------------------------------|-------------------------------------------------------------------------------------|-------------|-------------|-------------|-------------|---|------------|-------------|------------|---|-------------|-------------|-------------|---|------------|------------|-------------|---|------------|-------------|------------|---|-------------|-------------|------------|---|-------------|-------------|-------------|---|-------------|-------------|------------|---|------------|------------|-------------|---|-------------|------------|-------------|---|------------|------------|-------------|---|-------------|------------|------------|---|-------------|------------|-------------|---|-------------|------------|------------|---|------------|------------|-------------|---|------------|------------|-------------|---|------------|------------|-------------|---|-------------|------------|------------|---|-------------|------------|------------|---|------------|------------|------------|---|-------------|-------------|-------------|---|------------|-------------|------------|---|------------|-------------|------------|---|------------|-------------|------------|---|------------|-------------|------------|---|------------|-------------|------------|---|------------|-------------|------------|---|------------|-------------|------------|---|------------|------------|-------------|---|------------|------------|-------------|---|------------|------------|-------------|---|------------|------------|-------------|---|------------|------------|-------------|---|------------|------------|-------------|---|------------|------------|-------------|---|-------------|------------|------------|---|-------------|------------|------------|---|-------------|------------|------------|---|-------------|------------|------------|
| 5                                                                                                                                                                                                                                                                                                                                                                                                                                                                                                                                                                                                                                                                                                                                                                                                                                                                                                                                                                                                                                                                                                                                                                                                                                                                                                                                                                                                                                                                                                                                                                                                                                                                                                                                                                                                                                                                                                                                                                                                                                                                                                                                                                                                                                                                                                                                                                                                                                                                                                                                                                                                                                                                                                                                                                                                                                                                                                                                                                                                                                                                                                                                                                                                                                         | Ph <sup>•</sup>                                          | 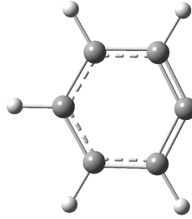  |             |             |             |             |   |            |             |            |   |             |             |             |   |            |            |             |   |            |             |            |   |             |             |            |   |             |             |             |   |             |             |            |   |            |            |             |   |             |            |             |   |            |            |             |   |             |            |            |   |             |            |             |   |             |            |            |   |            |            |             |   |            |            |             |   |            |            |             |   |             |            |            |   |             |            |            |   |            |            |            |   |             |             |             |   |            |             |            |   |            |             |            |   |            |             |            |   |            |             |            |   |            |             |            |   |            |             |            |   |            |             |            |   |            |            |             |   |            |            |             |   |            |            |             |   |            |            |             |   |            |            |             |   |            |            |             |   |            |            |             |   |             |            |            |   |             |            |            |   |             |            |            |   |             |            |            |
| <p>Cartesian Coordinates</p> <table border="1"> <tbody> <tr><td>C</td><td>-0.00001100</td><td>-1.39124300</td><td>-0.00000400</td></tr> <tr><td>C</td><td>1.22327700</td><td>-0.77038400</td><td>0.00004400</td></tr> <tr><td>C</td><td>-1.22327000</td><td>-0.77040100</td><td>-0.00003600</td></tr> <tr><td>C</td><td>1.21064900</td><td>0.63037200</td><td>-0.00003100</td></tr> <tr><td>H</td><td>2.15712100</td><td>-1.31877500</td><td>0.00001200</td></tr> <tr><td>C</td><td>-1.21063600</td><td>0.63040000</td><td>0.00003300</td></tr> <tr><td>H</td><td>-2.15714700</td><td>-1.31873400</td><td>-0.00003000</td></tr> <tr><td>C</td><td>-0.00000700</td><td>1.31936900</td><td>0.00000000</td></tr> <tr><td>H</td><td>2.14811300</td><td>1.17351100</td><td>-0.00005600</td></tr> <tr><td>H</td><td>-2.14812600</td><td>1.17349200</td><td>0.00004300</td></tr> <tr><td>H</td><td>0.00002400</td><td>2.40182100</td><td>-0.00000600</td></tr> </tbody> </table>                                                                                                                                                                                                                                                                                                                                                                                                                                                                                                                                                                                                                                                                                                                                                                                                                                                                                                                                                                                                                                                                                                                                                                                                                                                                                                                                                                                                                                                                                                                                                                                                                                                                                                                                                                                                                                                                                                                                                                                                                                                                                                                                                                                                                                                                 |                                                          |                                                                                     | C           | -0.00001100 | -1.39124300 | -0.00000400 | C | 1.22327700 | -0.77038400 | 0.00004400 | C | -1.22327000 | -0.77040100 | -0.00003600 | C | 1.21064900 | 0.63037200 | -0.00003100 | H | 2.15712100 | -1.31877500 | 0.00001200 | C | -1.21063600 | 0.63040000  | 0.00003300 | H | -2.15714700 | -1.31873400 | -0.00003000 | C | -0.00000700 | 1.31936900  | 0.00000000 | H | 2.14811300 | 1.17351100 | -0.00005600 | H | -2.14812600 | 1.17349200 | 0.00004300  | H | 0.00002400 | 2.40182100 | -0.00000600 |   |             |            |            |   |             |            |             |   |             |            |            |   |            |            |             |   |            |            |             |   |            |            |             |   |             |            |            |   |             |            |            |   |            |            |            |   |             |             |             |   |            |             |            |   |            |             |            |   |            |             |            |   |            |             |            |   |            |             |            |   |            |             |            |   |            |             |            |   |            |            |             |   |            |            |             |   |            |            |             |   |            |            |             |   |            |            |             |   |            |            |             |   |            |            |             |   |             |            |            |   |             |            |            |   |             |            |            |   |             |            |            |
| C                                                                                                                                                                                                                                                                                                                                                                                                                                                                                                                                                                                                                                                                                                                                                                                                                                                                                                                                                                                                                                                                                                                                                                                                                                                                                                                                                                                                                                                                                                                                                                                                                                                                                                                                                                                                                                                                                                                                                                                                                                                                                                                                                                                                                                                                                                                                                                                                                                                                                                                                                                                                                                                                                                                                                                                                                                                                                                                                                                                                                                                                                                                                                                                                                                         | -0.00001100                                              | -1.39124300                                                                         | -0.00000400 |             |             |             |   |            |             |            |   |             |             |             |   |            |            |             |   |            |             |            |   |             |             |            |   |             |             |             |   |             |             |            |   |            |            |             |   |             |            |             |   |            |            |             |   |             |            |            |   |             |            |             |   |             |            |            |   |            |            |             |   |            |            |             |   |            |            |             |   |             |            |            |   |             |            |            |   |            |            |            |   |             |             |             |   |            |             |            |   |            |             |            |   |            |             |            |   |            |             |            |   |            |             |            |   |            |             |            |   |            |             |            |   |            |            |             |   |            |            |             |   |            |            |             |   |            |            |             |   |            |            |             |   |            |            |             |   |            |            |             |   |             |            |            |   |             |            |            |   |             |            |            |   |             |            |            |
| C                                                                                                                                                                                                                                                                                                                                                                                                                                                                                                                                                                                                                                                                                                                                                                                                                                                                                                                                                                                                                                                                                                                                                                                                                                                                                                                                                                                                                                                                                                                                                                                                                                                                                                                                                                                                                                                                                                                                                                                                                                                                                                                                                                                                                                                                                                                                                                                                                                                                                                                                                                                                                                                                                                                                                                                                                                                                                                                                                                                                                                                                                                                                                                                                                                         | 1.22327700                                               | -0.77038400                                                                         | 0.00004400  |             |             |             |   |            |             |            |   |             |             |             |   |            |            |             |   |            |             |            |   |             |             |            |   |             |             |             |   |             |             |            |   |            |            |             |   |             |            |             |   |            |            |             |   |             |            |            |   |             |            |             |   |             |            |            |   |            |            |             |   |            |            |             |   |            |            |             |   |             |            |            |   |             |            |            |   |            |            |            |   |             |             |             |   |            |             |            |   |            |             |            |   |            |             |            |   |            |             |            |   |            |             |            |   |            |             |            |   |            |             |            |   |            |            |             |   |            |            |             |   |            |            |             |   |            |            |             |   |            |            |             |   |            |            |             |   |            |            |             |   |             |            |            |   |             |            |            |   |             |            |            |   |             |            |            |
| C                                                                                                                                                                                                                                                                                                                                                                                                                                                                                                                                                                                                                                                                                                                                                                                                                                                                                                                                                                                                                                                                                                                                                                                                                                                                                                                                                                                                                                                                                                                                                                                                                                                                                                                                                                                                                                                                                                                                                                                                                                                                                                                                                                                                                                                                                                                                                                                                                                                                                                                                                                                                                                                                                                                                                                                                                                                                                                                                                                                                                                                                                                                                                                                                                                         | -1.22327000                                              | -0.77040100                                                                         | -0.00003600 |             |             |             |   |            |             |            |   |             |             |             |   |            |            |             |   |            |             |            |   |             |             |            |   |             |             |             |   |             |             |            |   |            |            |             |   |             |            |             |   |            |            |             |   |             |            |            |   |             |            |             |   |             |            |            |   |            |            |             |   |            |            |             |   |            |            |             |   |             |            |            |   |             |            |            |   |            |            |            |   |             |             |             |   |            |             |            |   |            |             |            |   |            |             |            |   |            |             |            |   |            |             |            |   |            |             |            |   |            |             |            |   |            |            |             |   |            |            |             |   |            |            |             |   |            |            |             |   |            |            |             |   |            |            |             |   |            |            |             |   |             |            |            |   |             |            |            |   |             |            |            |   |             |            |            |
| C                                                                                                                                                                                                                                                                                                                                                                                                                                                                                                                                                                                                                                                                                                                                                                                                                                                                                                                                                                                                                                                                                                                                                                                                                                                                                                                                                                                                                                                                                                                                                                                                                                                                                                                                                                                                                                                                                                                                                                                                                                                                                                                                                                                                                                                                                                                                                                                                                                                                                                                                                                                                                                                                                                                                                                                                                                                                                                                                                                                                                                                                                                                                                                                                                                         | 1.21064900                                               | 0.63037200                                                                          | -0.00003100 |             |             |             |   |            |             |            |   |             |             |             |   |            |            |             |   |            |             |            |   |             |             |            |   |             |             |             |   |             |             |            |   |            |            |             |   |             |            |             |   |            |            |             |   |             |            |            |   |             |            |             |   |             |            |            |   |            |            |             |   |            |            |             |   |            |            |             |   |             |            |            |   |             |            |            |   |            |            |            |   |             |             |             |   |            |             |            |   |            |             |            |   |            |             |            |   |            |             |            |   |            |             |            |   |            |             |            |   |            |             |            |   |            |            |             |   |            |            |             |   |            |            |             |   |            |            |             |   |            |            |             |   |            |            |             |   |            |            |             |   |             |            |            |   |             |            |            |   |             |            |            |   |             |            |            |
| H                                                                                                                                                                                                                                                                                                                                                                                                                                                                                                                                                                                                                                                                                                                                                                                                                                                                                                                                                                                                                                                                                                                                                                                                                                                                                                                                                                                                                                                                                                                                                                                                                                                                                                                                                                                                                                                                                                                                                                                                                                                                                                                                                                                                                                                                                                                                                                                                                                                                                                                                                                                                                                                                                                                                                                                                                                                                                                                                                                                                                                                                                                                                                                                                                                         | 2.15712100                                               | -1.31877500                                                                         | 0.00001200  |             |             |             |   |            |             |            |   |             |             |             |   |            |            |             |   |            |             |            |   |             |             |            |   |             |             |             |   |             |             |            |   |            |            |             |   |             |            |             |   |            |            |             |   |             |            |            |   |             |            |             |   |             |            |            |   |            |            |             |   |            |            |             |   |            |            |             |   |             |            |            |   |             |            |            |   |            |            |            |   |             |             |             |   |            |             |            |   |            |             |            |   |            |             |            |   |            |             |            |   |            |             |            |   |            |             |            |   |            |             |            |   |            |            |             |   |            |            |             |   |            |            |             |   |            |            |             |   |            |            |             |   |            |            |             |   |            |            |             |   |             |            |            |   |             |            |            |   |             |            |            |   |             |            |            |
| C                                                                                                                                                                                                                                                                                                                                                                                                                                                                                                                                                                                                                                                                                                                                                                                                                                                                                                                                                                                                                                                                                                                                                                                                                                                                                                                                                                                                                                                                                                                                                                                                                                                                                                                                                                                                                                                                                                                                                                                                                                                                                                                                                                                                                                                                                                                                                                                                                                                                                                                                                                                                                                                                                                                                                                                                                                                                                                                                                                                                                                                                                                                                                                                                                                         | -1.21063600                                              | 0.63040000                                                                          | 0.00003300  |             |             |             |   |            |             |            |   |             |             |             |   |            |            |             |   |            |             |            |   |             |             |            |   |             |             |             |   |             |             |            |   |            |            |             |   |             |            |             |   |            |            |             |   |             |            |            |   |             |            |             |   |             |            |            |   |            |            |             |   |            |            |             |   |            |            |             |   |             |            |            |   |             |            |            |   |            |            |            |   |             |             |             |   |            |             |            |   |            |             |            |   |            |             |            |   |            |             |            |   |            |             |            |   |            |             |            |   |            |             |            |   |            |            |             |   |            |            |             |   |            |            |             |   |            |            |             |   |            |            |             |   |            |            |             |   |            |            |             |   |             |            |            |   |             |            |            |   |             |            |            |   |             |            |            |
| H                                                                                                                                                                                                                                                                                                                                                                                                                                                                                                                                                                                                                                                                                                                                                                                                                                                                                                                                                                                                                                                                                                                                                                                                                                                                                                                                                                                                                                                                                                                                                                                                                                                                                                                                                                                                                                                                                                                                                                                                                                                                                                                                                                                                                                                                                                                                                                                                                                                                                                                                                                                                                                                                                                                                                                                                                                                                                                                                                                                                                                                                                                                                                                                                                                         | -2.15714700                                              | -1.31873400                                                                         | -0.00003000 |             |             |             |   |            |             |            |   |             |             |             |   |            |            |             |   |            |             |            |   |             |             |            |   |             |             |             |   |             |             |            |   |            |            |             |   |             |            |             |   |            |            |             |   |             |            |            |   |             |            |             |   |             |            |            |   |            |            |             |   |            |            |             |   |            |            |             |   |             |            |            |   |             |            |            |   |            |            |            |   |             |             |             |   |            |             |            |   |            |             |            |   |            |             |            |   |            |             |            |   |            |             |            |   |            |             |            |   |            |             |            |   |            |            |             |   |            |            |             |   |            |            |             |   |            |            |             |   |            |            |             |   |            |            |             |   |            |            |             |   |             |            |            |   |             |            |            |   |             |            |            |   |             |            |            |
| C                                                                                                                                                                                                                                                                                                                                                                                                                                                                                                                                                                                                                                                                                                                                                                                                                                                                                                                                                                                                                                                                                                                                                                                                                                                                                                                                                                                                                                                                                                                                                                                                                                                                                                                                                                                                                                                                                                                                                                                                                                                                                                                                                                                                                                                                                                                                                                                                                                                                                                                                                                                                                                                                                                                                                                                                                                                                                                                                                                                                                                                                                                                                                                                                                                         | -0.00000700                                              | 1.31936900                                                                          | 0.00000000  |             |             |             |   |            |             |            |   |             |             |             |   |            |            |             |   |            |             |            |   |             |             |            |   |             |             |             |   |             |             |            |   |            |            |             |   |             |            |             |   |            |            |             |   |             |            |            |   |             |            |             |   |             |            |            |   |            |            |             |   |            |            |             |   |            |            |             |   |             |            |            |   |             |            |            |   |            |            |            |   |             |             |             |   |            |             |            |   |            |             |            |   |            |             |            |   |            |             |            |   |            |             |            |   |            |             |            |   |            |             |            |   |            |            |             |   |            |            |             |   |            |            |             |   |            |            |             |   |            |            |             |   |            |            |             |   |            |            |             |   |             |            |            |   |             |            |            |   |             |            |            |   |             |            |            |
| H                                                                                                                                                                                                                                                                                                                                                                                                                                                                                                                                                                                                                                                                                                                                                                                                                                                                                                                                                                                                                                                                                                                                                                                                                                                                                                                                                                                                                                                                                                                                                                                                                                                                                                                                                                                                                                                                                                                                                                                                                                                                                                                                                                                                                                                                                                                                                                                                                                                                                                                                                                                                                                                                                                                                                                                                                                                                                                                                                                                                                                                                                                                                                                                                                                         | 2.14811300                                               | 1.17351100                                                                          | -0.00005600 |             |             |             |   |            |             |            |   |             |             |             |   |            |            |             |   |            |             |            |   |             |             |            |   |             |             |             |   |             |             |            |   |            |            |             |   |             |            |             |   |            |            |             |   |             |            |            |   |             |            |             |   |             |            |            |   |            |            |             |   |            |            |             |   |            |            |             |   |             |            |            |   |             |            |            |   |            |            |            |   |             |             |             |   |            |             |            |   |            |             |            |   |            |             |            |   |            |             |            |   |            |             |            |   |            |             |            |   |            |             |            |   |            |            |             |   |            |            |             |   |            |            |             |   |            |            |             |   |            |            |             |   |            |            |             |   |            |            |             |   |             |            |            |   |             |            |            |   |             |            |            |   |             |            |            |
| H                                                                                                                                                                                                                                                                                                                                                                                                                                                                                                                                                                                                                                                                                                                                                                                                                                                                                                                                                                                                                                                                                                                                                                                                                                                                                                                                                                                                                                                                                                                                                                                                                                                                                                                                                                                                                                                                                                                                                                                                                                                                                                                                                                                                                                                                                                                                                                                                                                                                                                                                                                                                                                                                                                                                                                                                                                                                                                                                                                                                                                                                                                                                                                                                                                         | -2.14812600                                              | 1.17349200                                                                          | 0.00004300  |             |             |             |   |            |             |            |   |             |             |             |   |            |            |             |   |            |             |            |   |             |             |            |   |             |             |             |   |             |             |            |   |            |            |             |   |             |            |             |   |            |            |             |   |             |            |            |   |             |            |             |   |             |            |            |   |            |            |             |   |            |            |             |   |            |            |             |   |             |            |            |   |             |            |            |   |            |            |            |   |             |             |             |   |            |             |            |   |            |             |            |   |            |             |            |   |            |             |            |   |            |             |            |   |            |             |            |   |            |             |            |   |            |            |             |   |            |            |             |   |            |            |             |   |            |            |             |   |            |            |             |   |            |            |             |   |            |            |             |   |             |            |            |   |             |            |            |   |             |            |            |   |             |            |            |
| H                                                                                                                                                                                                                                                                                                                                                                                                                                                                                                                                                                                                                                                                                                                                                                                                                                                                                                                                                                                                                                                                                                                                                                                                                                                                                                                                                                                                                                                                                                                                                                                                                                                                                                                                                                                                                                                                                                                                                                                                                                                                                                                                                                                                                                                                                                                                                                                                                                                                                                                                                                                                                                                                                                                                                                                                                                                                                                                                                                                                                                                                                                                                                                                                                                         | 0.00002400                                               | 2.40182100                                                                          | -0.00000600 |             |             |             |   |            |             |            |   |             |             |             |   |            |            |             |   |            |             |            |   |             |             |            |   |             |             |             |   |             |             |            |   |            |            |             |   |             |            |             |   |            |            |             |   |             |            |            |   |             |            |             |   |             |            |            |   |            |            |             |   |            |            |             |   |            |            |             |   |             |            |            |   |             |            |            |   |            |            |            |   |             |             |             |   |            |             |            |   |            |             |            |   |            |             |            |   |            |             |            |   |            |             |            |   |            |             |            |   |            |             |            |   |            |            |             |   |            |            |             |   |            |            |             |   |            |            |             |   |            |            |             |   |            |            |             |   |            |            |             |   |             |            |            |   |             |            |            |   |             |            |            |   |             |            |            |
| 6                                                                                                                                                                                                                                                                                                                                                                                                                                                                                                                                                                                                                                                                                                                                                                                                                                                                                                                                                                                                                                                                                                                                                                                                                                                                                                                                                                                                                                                                                                                                                                                                                                                                                                                                                                                                                                                                                                                                                                                                                                                                                                                                                                                                                                                                                                                                                                                                                                                                                                                                                                                                                                                                                                                                                                                                                                                                                                                                                                                                                                                                                                                                                                                                                                         | <i>n</i> -Bu <sub>3</sub> NH <sup>+</sup> I <sup>-</sup> |  |             |             |             |             |   |            |             |            |   |             |             |             |   |            |            |             |   |            |             |            |   |             |             |            |   |             |             |             |   |             |             |            |   |            |            |             |   |             |            |             |   |            |            |             |   |             |            |            |   |             |            |             |   |             |            |            |   |            |            |             |   |            |            |             |   |            |            |             |   |             |            |            |   |             |            |            |   |            |            |            |   |             |             |             |   |            |             |            |   |            |             |            |   |            |             |            |   |            |             |            |   |            |             |            |   |            |             |            |   |            |             |            |   |            |            |             |   |            |            |             |   |            |            |             |   |            |            |             |   |            |            |             |   |            |            |             |   |            |            |             |   |             |            |            |   |             |            |            |   |             |            |            |   |             |            |            |
| <p>Cartesian Coordinates</p> <table border="1"> <tbody> <tr><td>C</td><td>-0.66222300</td><td>1.25516800</td><td>1.40377700</td></tr> <tr><td>N</td><td>0.77120100</td><td>1.53163300</td><td>1.00067100</td></tr> <tr><td>C</td><td>1.75090000</td><td>0.75840000</td><td>1.86099000</td></tr> <tr><td>H</td><td>1.50757000</td><td>1.01659900</td><td>2.89083200</td></tr> <tr><td>H</td><td>2.73808000</td><td>1.16041500</td><td>1.64493300</td></tr> <tr><td>C</td><td>1.71708200</td><td>-0.74610100</td><td>1.65380700</td></tr> <tr><td>H</td><td>1.93409900</td><td>-0.99338800</td><td>0.61270200</td></tr> <tr><td>H</td><td>0.72211700</td><td>-1.13906400</td><td>1.86962700</td></tr> <tr><td>C</td><td>0.98345500</td><td>1.35513400</td><td>-0.48810300</td></tr> <tr><td>H</td><td>0.63905400</td><td>0.35236400</td><td>-0.73644300</td></tr> <tr><td>H</td><td>0.31366700</td><td>2.06350700</td><td>-0.96926300</td></tr> <tr><td>C</td><td>-1.66013800</td><td>2.23216000</td><td>0.80418600</td></tr> <tr><td>H</td><td>-1.72135000</td><td>2.09803200</td><td>-0.27727500</td></tr> <tr><td>H</td><td>-1.33504300</td><td>3.26150100</td><td>0.98867800</td></tr> <tr><td>C</td><td>2.41214400</td><td>1.60427900</td><td>-0.94013300</td></tr> <tr><td>H</td><td>3.08280200</td><td>0.84379000</td><td>-0.53528900</td></tr> <tr><td>H</td><td>2.75952300</td><td>2.57313000</td><td>-0.56652700</td></tr> <tr><td>H</td><td>-0.68285400</td><td>1.30970700</td><td>2.49151100</td></tr> <tr><td>H</td><td>-0.88520800</td><td>0.23620700</td><td>1.09480600</td></tr> <tr><td>H</td><td>0.94580400</td><td>2.51702100</td><td>1.20629200</td></tr> <tr><td>I</td><td>-1.56915100</td><td>-1.84083300</td><td>-1.06485000</td></tr> <tr><td>C</td><td>2.74202400</td><td>-1.43571500</td><td>2.55766900</td></tr> <tr><td>H</td><td>2.53399500</td><td>-1.18119000</td><td>3.60134700</td></tr> <tr><td>H</td><td>3.74033200</td><td>-1.04640300</td><td>2.33563500</td></tr> <tr><td>C</td><td>2.73193900</td><td>-2.95285500</td><td>2.38627500</td></tr> <tr><td>H</td><td>2.96583500</td><td>-3.23217400</td><td>1.35625300</td></tr> <tr><td>H</td><td>3.46775900</td><td>-3.42664700</td><td>3.03820000</td></tr> <tr><td>H</td><td>1.75077900</td><td>-3.36746300</td><td>2.62905700</td></tr> <tr><td>C</td><td>2.50454600</td><td>1.58283200</td><td>-2.46793300</td></tr> <tr><td>H</td><td>1.85241800</td><td>2.35794300</td><td>-2.88095000</td></tr> <tr><td>H</td><td>2.12257000</td><td>0.62623300</td><td>-2.83698600</td></tr> <tr><td>C</td><td>3.93301000</td><td>1.79194600</td><td>-2.96457200</td></tr> <tr><td>H</td><td>4.59668700</td><td>1.00910600</td><td>-2.58975300</td></tr> <tr><td>H</td><td>3.97615600</td><td>1.77428300</td><td>-4.05482800</td></tr> <tr><td>H</td><td>4.32797700</td><td>2.75371100</td><td>-2.62835500</td></tr> <tr><td>C</td><td>-3.05133700</td><td>2.01955000</td><td>1.40645900</td></tr> <tr><td>H</td><td>-3.00377700</td><td>2.16873600</td><td>2.48926600</td></tr> <tr><td>H</td><td>-3.35447200</td><td>0.98049200</td><td>1.24696800</td></tr> <tr><td>C</td><td>-4.09290200</td><td>2.95715200</td><td>0.80075900</td></tr> </tbody> </table> |                                                          |                                                                                     | C           | -0.66222300 | 1.25516800  | 1.40377700  | N | 0.77120100 | 1.53163300  | 1.00067100 | C | 1.75090000  | 0.75840000  | 1.86099000  | H | 1.50757000 | 1.01659900 | 2.89083200  | H | 2.73808000 | 1.16041500  | 1.64493300 | C | 1.71708200  | -0.74610100 | 1.65380700 | H | 1.93409900  | -0.99338800 | 0.61270200  | H | 0.72211700  | -1.13906400 | 1.86962700 | C | 0.98345500 | 1.35513400 | -0.48810300 | H | 0.63905400  | 0.35236400 | -0.73644300 | H | 0.31366700 | 2.06350700 | -0.96926300 | C | -1.66013800 | 2.23216000 | 0.80418600 | H | -1.72135000 | 2.09803200 | -0.27727500 | H | -1.33504300 | 3.26150100 | 0.98867800 | C | 2.41214400 | 1.60427900 | -0.94013300 | H | 3.08280200 | 0.84379000 | -0.53528900 | H | 2.75952300 | 2.57313000 | -0.56652700 | H | -0.68285400 | 1.30970700 | 2.49151100 | H | -0.88520800 | 0.23620700 | 1.09480600 | H | 0.94580400 | 2.51702100 | 1.20629200 | I | -1.56915100 | -1.84083300 | -1.06485000 | C | 2.74202400 | -1.43571500 | 2.55766900 | H | 2.53399500 | -1.18119000 | 3.60134700 | H | 3.74033200 | -1.04640300 | 2.33563500 | C | 2.73193900 | -2.95285500 | 2.38627500 | H | 2.96583500 | -3.23217400 | 1.35625300 | H | 3.46775900 | -3.42664700 | 3.03820000 | H | 1.75077900 | -3.36746300 | 2.62905700 | C | 2.50454600 | 1.58283200 | -2.46793300 | H | 1.85241800 | 2.35794300 | -2.88095000 | H | 2.12257000 | 0.62623300 | -2.83698600 | C | 3.93301000 | 1.79194600 | -2.96457200 | H | 4.59668700 | 1.00910600 | -2.58975300 | H | 3.97615600 | 1.77428300 | -4.05482800 | H | 4.32797700 | 2.75371100 | -2.62835500 | C | -3.05133700 | 2.01955000 | 1.40645900 | H | -3.00377700 | 2.16873600 | 2.48926600 | H | -3.35447200 | 0.98049200 | 1.24696800 | C | -4.09290200 | 2.95715200 | 0.80075900 |
| C                                                                                                                                                                                                                                                                                                                                                                                                                                                                                                                                                                                                                                                                                                                                                                                                                                                                                                                                                                                                                                                                                                                                                                                                                                                                                                                                                                                                                                                                                                                                                                                                                                                                                                                                                                                                                                                                                                                                                                                                                                                                                                                                                                                                                                                                                                                                                                                                                                                                                                                                                                                                                                                                                                                                                                                                                                                                                                                                                                                                                                                                                                                                                                                                                                         | -0.66222300                                              | 1.25516800                                                                          | 1.40377700  |             |             |             |   |            |             |            |   |             |             |             |   |            |            |             |   |            |             |            |   |             |             |            |   |             |             |             |   |             |             |            |   |            |            |             |   |             |            |             |   |            |            |             |   |             |            |            |   |             |            |             |   |             |            |            |   |            |            |             |   |            |            |             |   |            |            |             |   |             |            |            |   |             |            |            |   |            |            |            |   |             |             |             |   |            |             |            |   |            |             |            |   |            |             |            |   |            |             |            |   |            |             |            |   |            |             |            |   |            |             |            |   |            |            |             |   |            |            |             |   |            |            |             |   |            |            |             |   |            |            |             |   |            |            |             |   |            |            |             |   |             |            |            |   |             |            |            |   |             |            |            |   |             |            |            |
| N                                                                                                                                                                                                                                                                                                                                                                                                                                                                                                                                                                                                                                                                                                                                                                                                                                                                                                                                                                                                                                                                                                                                                                                                                                                                                                                                                                                                                                                                                                                                                                                                                                                                                                                                                                                                                                                                                                                                                                                                                                                                                                                                                                                                                                                                                                                                                                                                                                                                                                                                                                                                                                                                                                                                                                                                                                                                                                                                                                                                                                                                                                                                                                                                                                         | 0.77120100                                               | 1.53163300                                                                          | 1.00067100  |             |             |             |   |            |             |            |   |             |             |             |   |            |            |             |   |            |             |            |   |             |             |            |   |             |             |             |   |             |             |            |   |            |            |             |   |             |            |             |   |            |            |             |   |             |            |            |   |             |            |             |   |             |            |            |   |            |            |             |   |            |            |             |   |            |            |             |   |             |            |            |   |             |            |            |   |            |            |            |   |             |             |             |   |            |             |            |   |            |             |            |   |            |             |            |   |            |             |            |   |            |             |            |   |            |             |            |   |            |             |            |   |            |            |             |   |            |            |             |   |            |            |             |   |            |            |             |   |            |            |             |   |            |            |             |   |            |            |             |   |             |            |            |   |             |            |            |   |             |            |            |   |             |            |            |
| C                                                                                                                                                                                                                                                                                                                                                                                                                                                                                                                                                                                                                                                                                                                                                                                                                                                                                                                                                                                                                                                                                                                                                                                                                                                                                                                                                                                                                                                                                                                                                                                                                                                                                                                                                                                                                                                                                                                                                                                                                                                                                                                                                                                                                                                                                                                                                                                                                                                                                                                                                                                                                                                                                                                                                                                                                                                                                                                                                                                                                                                                                                                                                                                                                                         | 1.75090000                                               | 0.75840000                                                                          | 1.86099000  |             |             |             |   |            |             |            |   |             |             |             |   |            |            |             |   |            |             |            |   |             |             |            |   |             |             |             |   |             |             |            |   |            |            |             |   |             |            |             |   |            |            |             |   |             |            |            |   |             |            |             |   |             |            |            |   |            |            |             |   |            |            |             |   |            |            |             |   |             |            |            |   |             |            |            |   |            |            |            |   |             |             |             |   |            |             |            |   |            |             |            |   |            |             |            |   |            |             |            |   |            |             |            |   |            |             |            |   |            |             |            |   |            |            |             |   |            |            |             |   |            |            |             |   |            |            |             |   |            |            |             |   |            |            |             |   |            |            |             |   |             |            |            |   |             |            |            |   |             |            |            |   |             |            |            |
| H                                                                                                                                                                                                                                                                                                                                                                                                                                                                                                                                                                                                                                                                                                                                                                                                                                                                                                                                                                                                                                                                                                                                                                                                                                                                                                                                                                                                                                                                                                                                                                                                                                                                                                                                                                                                                                                                                                                                                                                                                                                                                                                                                                                                                                                                                                                                                                                                                                                                                                                                                                                                                                                                                                                                                                                                                                                                                                                                                                                                                                                                                                                                                                                                                                         | 1.50757000                                               | 1.01659900                                                                          | 2.89083200  |             |             |             |   |            |             |            |   |             |             |             |   |            |            |             |   |            |             |            |   |             |             |            |   |             |             |             |   |             |             |            |   |            |            |             |   |             |            |             |   |            |            |             |   |             |            |            |   |             |            |             |   |             |            |            |   |            |            |             |   |            |            |             |   |            |            |             |   |             |            |            |   |             |            |            |   |            |            |            |   |             |             |             |   |            |             |            |   |            |             |            |   |            |             |            |   |            |             |            |   |            |             |            |   |            |             |            |   |            |             |            |   |            |            |             |   |            |            |             |   |            |            |             |   |            |            |             |   |            |            |             |   |            |            |             |   |            |            |             |   |             |            |            |   |             |            |            |   |             |            |            |   |             |            |            |
| H                                                                                                                                                                                                                                                                                                                                                                                                                                                                                                                                                                                                                                                                                                                                                                                                                                                                                                                                                                                                                                                                                                                                                                                                                                                                                                                                                                                                                                                                                                                                                                                                                                                                                                                                                                                                                                                                                                                                                                                                                                                                                                                                                                                                                                                                                                                                                                                                                                                                                                                                                                                                                                                                                                                                                                                                                                                                                                                                                                                                                                                                                                                                                                                                                                         | 2.73808000                                               | 1.16041500                                                                          | 1.64493300  |             |             |             |   |            |             |            |   |             |             |             |   |            |            |             |   |            |             |            |   |             |             |            |   |             |             |             |   |             |             |            |   |            |            |             |   |             |            |             |   |            |            |             |   |             |            |            |   |             |            |             |   |             |            |            |   |            |            |             |   |            |            |             |   |            |            |             |   |             |            |            |   |             |            |            |   |            |            |            |   |             |             |             |   |            |             |            |   |            |             |            |   |            |             |            |   |            |             |            |   |            |             |            |   |            |             |            |   |            |             |            |   |            |            |             |   |            |            |             |   |            |            |             |   |            |            |             |   |            |            |             |   |            |            |             |   |            |            |             |   |             |            |            |   |             |            |            |   |             |            |            |   |             |            |            |
| C                                                                                                                                                                                                                                                                                                                                                                                                                                                                                                                                                                                                                                                                                                                                                                                                                                                                                                                                                                                                                                                                                                                                                                                                                                                                                                                                                                                                                                                                                                                                                                                                                                                                                                                                                                                                                                                                                                                                                                                                                                                                                                                                                                                                                                                                                                                                                                                                                                                                                                                                                                                                                                                                                                                                                                                                                                                                                                                                                                                                                                                                                                                                                                                                                                         | 1.71708200                                               | -0.74610100                                                                         | 1.65380700  |             |             |             |   |            |             |            |   |             |             |             |   |            |            |             |   |            |             |            |   |             |             |            |   |             |             |             |   |             |             |            |   |            |            |             |   |             |            |             |   |            |            |             |   |             |            |            |   |             |            |             |   |             |            |            |   |            |            |             |   |            |            |             |   |            |            |             |   |             |            |            |   |             |            |            |   |            |            |            |   |             |             |             |   |            |             |            |   |            |             |            |   |            |             |            |   |            |             |            |   |            |             |            |   |            |             |            |   |            |             |            |   |            |            |             |   |            |            |             |   |            |            |             |   |            |            |             |   |            |            |             |   |            |            |             |   |            |            |             |   |             |            |            |   |             |            |            |   |             |            |            |   |             |            |            |
| H                                                                                                                                                                                                                                                                                                                                                                                                                                                                                                                                                                                                                                                                                                                                                                                                                                                                                                                                                                                                                                                                                                                                                                                                                                                                                                                                                                                                                                                                                                                                                                                                                                                                                                                                                                                                                                                                                                                                                                                                                                                                                                                                                                                                                                                                                                                                                                                                                                                                                                                                                                                                                                                                                                                                                                                                                                                                                                                                                                                                                                                                                                                                                                                                                                         | 1.93409900                                               | -0.99338800                                                                         | 0.61270200  |             |             |             |   |            |             |            |   |             |             |             |   |            |            |             |   |            |             |            |   |             |             |            |   |             |             |             |   |             |             |            |   |            |            |             |   |             |            |             |   |            |            |             |   |             |            |            |   |             |            |             |   |             |            |            |   |            |            |             |   |            |            |             |   |            |            |             |   |             |            |            |   |             |            |            |   |            |            |            |   |             |             |             |   |            |             |            |   |            |             |            |   |            |             |            |   |            |             |            |   |            |             |            |   |            |             |            |   |            |             |            |   |            |            |             |   |            |            |             |   |            |            |             |   |            |            |             |   |            |            |             |   |            |            |             |   |            |            |             |   |             |            |            |   |             |            |            |   |             |            |            |   |             |            |            |
| H                                                                                                                                                                                                                                                                                                                                                                                                                                                                                                                                                                                                                                                                                                                                                                                                                                                                                                                                                                                                                                                                                                                                                                                                                                                                                                                                                                                                                                                                                                                                                                                                                                                                                                                                                                                                                                                                                                                                                                                                                                                                                                                                                                                                                                                                                                                                                                                                                                                                                                                                                                                                                                                                                                                                                                                                                                                                                                                                                                                                                                                                                                                                                                                                                                         | 0.72211700                                               | -1.13906400                                                                         | 1.86962700  |             |             |             |   |            |             |            |   |             |             |             |   |            |            |             |   |            |             |            |   |             |             |            |   |             |             |             |   |             |             |            |   |            |            |             |   |             |            |             |   |            |            |             |   |             |            |            |   |             |            |             |   |             |            |            |   |            |            |             |   |            |            |             |   |            |            |             |   |             |            |            |   |             |            |            |   |            |            |            |   |             |             |             |   |            |             |            |   |            |             |            |   |            |             |            |   |            |             |            |   |            |             |            |   |            |             |            |   |            |             |            |   |            |            |             |   |            |            |             |   |            |            |             |   |            |            |             |   |            |            |             |   |            |            |             |   |            |            |             |   |             |            |            |   |             |            |            |   |             |            |            |   |             |            |            |
| C                                                                                                                                                                                                                                                                                                                                                                                                                                                                                                                                                                                                                                                                                                                                                                                                                                                                                                                                                                                                                                                                                                                                                                                                                                                                                                                                                                                                                                                                                                                                                                                                                                                                                                                                                                                                                                                                                                                                                                                                                                                                                                                                                                                                                                                                                                                                                                                                                                                                                                                                                                                                                                                                                                                                                                                                                                                                                                                                                                                                                                                                                                                                                                                                                                         | 0.98345500                                               | 1.35513400                                                                          | -0.48810300 |             |             |             |   |            |             |            |   |             |             |             |   |            |            |             |   |            |             |            |   |             |             |            |   |             |             |             |   |             |             |            |   |            |            |             |   |             |            |             |   |            |            |             |   |             |            |            |   |             |            |             |   |             |            |            |   |            |            |             |   |            |            |             |   |            |            |             |   |             |            |            |   |             |            |            |   |            |            |            |   |             |             |             |   |            |             |            |   |            |             |            |   |            |             |            |   |            |             |            |   |            |             |            |   |            |             |            |   |            |             |            |   |            |            |             |   |            |            |             |   |            |            |             |   |            |            |             |   |            |            |             |   |            |            |             |   |            |            |             |   |             |            |            |   |             |            |            |   |             |            |            |   |             |            |            |
| H                                                                                                                                                                                                                                                                                                                                                                                                                                                                                                                                                                                                                                                                                                                                                                                                                                                                                                                                                                                                                                                                                                                                                                                                                                                                                                                                                                                                                                                                                                                                                                                                                                                                                                                                                                                                                                                                                                                                                                                                                                                                                                                                                                                                                                                                                                                                                                                                                                                                                                                                                                                                                                                                                                                                                                                                                                                                                                                                                                                                                                                                                                                                                                                                                                         | 0.63905400                                               | 0.35236400                                                                          | -0.73644300 |             |             |             |   |            |             |            |   |             |             |             |   |            |            |             |   |            |             |            |   |             |             |            |   |             |             |             |   |             |             |            |   |            |            |             |   |             |            |             |   |            |            |             |   |             |            |            |   |             |            |             |   |             |            |            |   |            |            |             |   |            |            |             |   |            |            |             |   |             |            |            |   |             |            |            |   |            |            |            |   |             |             |             |   |            |             |            |   |            |             |            |   |            |             |            |   |            |             |            |   |            |             |            |   |            |             |            |   |            |             |            |   |            |            |             |   |            |            |             |   |            |            |             |   |            |            |             |   |            |            |             |   |            |            |             |   |            |            |             |   |             |            |            |   |             |            |            |   |             |            |            |   |             |            |            |
| H                                                                                                                                                                                                                                                                                                                                                                                                                                                                                                                                                                                                                                                                                                                                                                                                                                                                                                                                                                                                                                                                                                                                                                                                                                                                                                                                                                                                                                                                                                                                                                                                                                                                                                                                                                                                                                                                                                                                                                                                                                                                                                                                                                                                                                                                                                                                                                                                                                                                                                                                                                                                                                                                                                                                                                                                                                                                                                                                                                                                                                                                                                                                                                                                                                         | 0.31366700                                               | 2.06350700                                                                          | -0.96926300 |             |             |             |   |            |             |            |   |             |             |             |   |            |            |             |   |            |             |            |   |             |             |            |   |             |             |             |   |             |             |            |   |            |            |             |   |             |            |             |   |            |            |             |   |             |            |            |   |             |            |             |   |             |            |            |   |            |            |             |   |            |            |             |   |            |            |             |   |             |            |            |   |             |            |            |   |            |            |            |   |             |             |             |   |            |             |            |   |            |             |            |   |            |             |            |   |            |             |            |   |            |             |            |   |            |             |            |   |            |             |            |   |            |            |             |   |            |            |             |   |            |            |             |   |            |            |             |   |            |            |             |   |            |            |             |   |            |            |             |   |             |            |            |   |             |            |            |   |             |            |            |   |             |            |            |
| C                                                                                                                                                                                                                                                                                                                                                                                                                                                                                                                                                                                                                                                                                                                                                                                                                                                                                                                                                                                                                                                                                                                                                                                                                                                                                                                                                                                                                                                                                                                                                                                                                                                                                                                                                                                                                                                                                                                                                                                                                                                                                                                                                                                                                                                                                                                                                                                                                                                                                                                                                                                                                                                                                                                                                                                                                                                                                                                                                                                                                                                                                                                                                                                                                                         | -1.66013800                                              | 2.23216000                                                                          | 0.80418600  |             |             |             |   |            |             |            |   |             |             |             |   |            |            |             |   |            |             |            |   |             |             |            |   |             |             |             |   |             |             |            |   |            |            |             |   |             |            |             |   |            |            |             |   |             |            |            |   |             |            |             |   |             |            |            |   |            |            |             |   |            |            |             |   |            |            |             |   |             |            |            |   |             |            |            |   |            |            |            |   |             |             |             |   |            |             |            |   |            |             |            |   |            |             |            |   |            |             |            |   |            |             |            |   |            |             |            |   |            |             |            |   |            |            |             |   |            |            |             |   |            |            |             |   |            |            |             |   |            |            |             |   |            |            |             |   |            |            |             |   |             |            |            |   |             |            |            |   |             |            |            |   |             |            |            |
| H                                                                                                                                                                                                                                                                                                                                                                                                                                                                                                                                                                                                                                                                                                                                                                                                                                                                                                                                                                                                                                                                                                                                                                                                                                                                                                                                                                                                                                                                                                                                                                                                                                                                                                                                                                                                                                                                                                                                                                                                                                                                                                                                                                                                                                                                                                                                                                                                                                                                                                                                                                                                                                                                                                                                                                                                                                                                                                                                                                                                                                                                                                                                                                                                                                         | -1.72135000                                              | 2.09803200                                                                          | -0.27727500 |             |             |             |   |            |             |            |   |             |             |             |   |            |            |             |   |            |             |            |   |             |             |            |   |             |             |             |   |             |             |            |   |            |            |             |   |             |            |             |   |            |            |             |   |             |            |            |   |             |            |             |   |             |            |            |   |            |            |             |   |            |            |             |   |            |            |             |   |             |            |            |   |             |            |            |   |            |            |            |   |             |             |             |   |            |             |            |   |            |             |            |   |            |             |            |   |            |             |            |   |            |             |            |   |            |             |            |   |            |             |            |   |            |            |             |   |            |            |             |   |            |            |             |   |            |            |             |   |            |            |             |   |            |            |             |   |            |            |             |   |             |            |            |   |             |            |            |   |             |            |            |   |             |            |            |
| H                                                                                                                                                                                                                                                                                                                                                                                                                                                                                                                                                                                                                                                                                                                                                                                                                                                                                                                                                                                                                                                                                                                                                                                                                                                                                                                                                                                                                                                                                                                                                                                                                                                                                                                                                                                                                                                                                                                                                                                                                                                                                                                                                                                                                                                                                                                                                                                                                                                                                                                                                                                                                                                                                                                                                                                                                                                                                                                                                                                                                                                                                                                                                                                                                                         | -1.33504300                                              | 3.26150100                                                                          | 0.98867800  |             |             |             |   |            |             |            |   |             |             |             |   |            |            |             |   |            |             |            |   |             |             |            |   |             |             |             |   |             |             |            |   |            |            |             |   |             |            |             |   |            |            |             |   |             |            |            |   |             |            |             |   |             |            |            |   |            |            |             |   |            |            |             |   |            |            |             |   |             |            |            |   |             |            |            |   |            |            |            |   |             |             |             |   |            |             |            |   |            |             |            |   |            |             |            |   |            |             |            |   |            |             |            |   |            |             |            |   |            |             |            |   |            |            |             |   |            |            |             |   |            |            |             |   |            |            |             |   |            |            |             |   |            |            |             |   |            |            |             |   |             |            |            |   |             |            |            |   |             |            |            |   |             |            |            |
| C                                                                                                                                                                                                                                                                                                                                                                                                                                                                                                                                                                                                                                                                                                                                                                                                                                                                                                                                                                                                                                                                                                                                                                                                                                                                                                                                                                                                                                                                                                                                                                                                                                                                                                                                                                                                                                                                                                                                                                                                                                                                                                                                                                                                                                                                                                                                                                                                                                                                                                                                                                                                                                                                                                                                                                                                                                                                                                                                                                                                                                                                                                                                                                                                                                         | 2.41214400                                               | 1.60427900                                                                          | -0.94013300 |             |             |             |   |            |             |            |   |             |             |             |   |            |            |             |   |            |             |            |   |             |             |            |   |             |             |             |   |             |             |            |   |            |            |             |   |             |            |             |   |            |            |             |   |             |            |            |   |             |            |             |   |             |            |            |   |            |            |             |   |            |            |             |   |            |            |             |   |             |            |            |   |             |            |            |   |            |            |            |   |             |             |             |   |            |             |            |   |            |             |            |   |            |             |            |   |            |             |            |   |            |             |            |   |            |             |            |   |            |             |            |   |            |            |             |   |            |            |             |   |            |            |             |   |            |            |             |   |            |            |             |   |            |            |             |   |            |            |             |   |             |            |            |   |             |            |            |   |             |            |            |   |             |            |            |
| H                                                                                                                                                                                                                                                                                                                                                                                                                                                                                                                                                                                                                                                                                                                                                                                                                                                                                                                                                                                                                                                                                                                                                                                                                                                                                                                                                                                                                                                                                                                                                                                                                                                                                                                                                                                                                                                                                                                                                                                                                                                                                                                                                                                                                                                                                                                                                                                                                                                                                                                                                                                                                                                                                                                                                                                                                                                                                                                                                                                                                                                                                                                                                                                                                                         | 3.08280200                                               | 0.84379000                                                                          | -0.53528900 |             |             |             |   |            |             |            |   |             |             |             |   |            |            |             |   |            |             |            |   |             |             |            |   |             |             |             |   |             |             |            |   |            |            |             |   |             |            |             |   |            |            |             |   |             |            |            |   |             |            |             |   |             |            |            |   |            |            |             |   |            |            |             |   |            |            |             |   |             |            |            |   |             |            |            |   |            |            |            |   |             |             |             |   |            |             |            |   |            |             |            |   |            |             |            |   |            |             |            |   |            |             |            |   |            |             |            |   |            |             |            |   |            |            |             |   |            |            |             |   |            |            |             |   |            |            |             |   |            |            |             |   |            |            |             |   |            |            |             |   |             |            |            |   |             |            |            |   |             |            |            |   |             |            |            |
| H                                                                                                                                                                                                                                                                                                                                                                                                                                                                                                                                                                                                                                                                                                                                                                                                                                                                                                                                                                                                                                                                                                                                                                                                                                                                                                                                                                                                                                                                                                                                                                                                                                                                                                                                                                                                                                                                                                                                                                                                                                                                                                                                                                                                                                                                                                                                                                                                                                                                                                                                                                                                                                                                                                                                                                                                                                                                                                                                                                                                                                                                                                                                                                                                                                         | 2.75952300                                               | 2.57313000                                                                          | -0.56652700 |             |             |             |   |            |             |            |   |             |             |             |   |            |            |             |   |            |             |            |   |             |             |            |   |             |             |             |   |             |             |            |   |            |            |             |   |             |            |             |   |            |            |             |   |             |            |            |   |             |            |             |   |             |            |            |   |            |            |             |   |            |            |             |   |            |            |             |   |             |            |            |   |             |            |            |   |            |            |            |   |             |             |             |   |            |             |            |   |            |             |            |   |            |             |            |   |            |             |            |   |            |             |            |   |            |             |            |   |            |             |            |   |            |            |             |   |            |            |             |   |            |            |             |   |            |            |             |   |            |            |             |   |            |            |             |   |            |            |             |   |             |            |            |   |             |            |            |   |             |            |            |   |             |            |            |
| H                                                                                                                                                                                                                                                                                                                                                                                                                                                                                                                                                                                                                                                                                                                                                                                                                                                                                                                                                                                                                                                                                                                                                                                                                                                                                                                                                                                                                                                                                                                                                                                                                                                                                                                                                                                                                                                                                                                                                                                                                                                                                                                                                                                                                                                                                                                                                                                                                                                                                                                                                                                                                                                                                                                                                                                                                                                                                                                                                                                                                                                                                                                                                                                                                                         | -0.68285400                                              | 1.30970700                                                                          | 2.49151100  |             |             |             |   |            |             |            |   |             |             |             |   |            |            |             |   |            |             |            |   |             |             |            |   |             |             |             |   |             |             |            |   |            |            |             |   |             |            |             |   |            |            |             |   |             |            |            |   |             |            |             |   |             |            |            |   |            |            |             |   |            |            |             |   |            |            |             |   |             |            |            |   |             |            |            |   |            |            |            |   |             |             |             |   |            |             |            |   |            |             |            |   |            |             |            |   |            |             |            |   |            |             |            |   |            |             |            |   |            |             |            |   |            |            |             |   |            |            |             |   |            |            |             |   |            |            |             |   |            |            |             |   |            |            |             |   |            |            |             |   |             |            |            |   |             |            |            |   |             |            |            |   |             |            |            |
| H                                                                                                                                                                                                                                                                                                                                                                                                                                                                                                                                                                                                                                                                                                                                                                                                                                                                                                                                                                                                                                                                                                                                                                                                                                                                                                                                                                                                                                                                                                                                                                                                                                                                                                                                                                                                                                                                                                                                                                                                                                                                                                                                                                                                                                                                                                                                                                                                                                                                                                                                                                                                                                                                                                                                                                                                                                                                                                                                                                                                                                                                                                                                                                                                                                         | -0.88520800                                              | 0.23620700                                                                          | 1.09480600  |             |             |             |   |            |             |            |   |             |             |             |   |            |            |             |   |            |             |            |   |             |             |            |   |             |             |             |   |             |             |            |   |            |            |             |   |             |            |             |   |            |            |             |   |             |            |            |   |             |            |             |   |             |            |            |   |            |            |             |   |            |            |             |   |            |            |             |   |             |            |            |   |             |            |            |   |            |            |            |   |             |             |             |   |            |             |            |   |            |             |            |   |            |             |            |   |            |             |            |   |            |             |            |   |            |             |            |   |            |             |            |   |            |            |             |   |            |            |             |   |            |            |             |   |            |            |             |   |            |            |             |   |            |            |             |   |            |            |             |   |             |            |            |   |             |            |            |   |             |            |            |   |             |            |            |
| H                                                                                                                                                                                                                                                                                                                                                                                                                                                                                                                                                                                                                                                                                                                                                                                                                                                                                                                                                                                                                                                                                                                                                                                                                                                                                                                                                                                                                                                                                                                                                                                                                                                                                                                                                                                                                                                                                                                                                                                                                                                                                                                                                                                                                                                                                                                                                                                                                                                                                                                                                                                                                                                                                                                                                                                                                                                                                                                                                                                                                                                                                                                                                                                                                                         | 0.94580400                                               | 2.51702100                                                                          | 1.20629200  |             |             |             |   |            |             |            |   |             |             |             |   |            |            |             |   |            |             |            |   |             |             |            |   |             |             |             |   |             |             |            |   |            |            |             |   |             |            |             |   |            |            |             |   |             |            |            |   |             |            |             |   |             |            |            |   |            |            |             |   |            |            |             |   |            |            |             |   |             |            |            |   |             |            |            |   |            |            |            |   |             |             |             |   |            |             |            |   |            |             |            |   |            |             |            |   |            |             |            |   |            |             |            |   |            |             |            |   |            |             |            |   |            |            |             |   |            |            |             |   |            |            |             |   |            |            |             |   |            |            |             |   |            |            |             |   |            |            |             |   |             |            |            |   |             |            |            |   |             |            |            |   |             |            |            |
| I                                                                                                                                                                                                                                                                                                                                                                                                                                                                                                                                                                                                                                                                                                                                                                                                                                                                                                                                                                                                                                                                                                                                                                                                                                                                                                                                                                                                                                                                                                                                                                                                                                                                                                                                                                                                                                                                                                                                                                                                                                                                                                                                                                                                                                                                                                                                                                                                                                                                                                                                                                                                                                                                                                                                                                                                                                                                                                                                                                                                                                                                                                                                                                                                                                         | -1.56915100                                              | -1.84083300                                                                         | -1.06485000 |             |             |             |   |            |             |            |   |             |             |             |   |            |            |             |   |            |             |            |   |             |             |            |   |             |             |             |   |             |             |            |   |            |            |             |   |             |            |             |   |            |            |             |   |             |            |            |   |             |            |             |   |             |            |            |   |            |            |             |   |            |            |             |   |            |            |             |   |             |            |            |   |             |            |            |   |            |            |            |   |             |             |             |   |            |             |            |   |            |             |            |   |            |             |            |   |            |             |            |   |            |             |            |   |            |             |            |   |            |             |            |   |            |            |             |   |            |            |             |   |            |            |             |   |            |            |             |   |            |            |             |   |            |            |             |   |            |            |             |   |             |            |            |   |             |            |            |   |             |            |            |   |             |            |            |
| C                                                                                                                                                                                                                                                                                                                                                                                                                                                                                                                                                                                                                                                                                                                                                                                                                                                                                                                                                                                                                                                                                                                                                                                                                                                                                                                                                                                                                                                                                                                                                                                                                                                                                                                                                                                                                                                                                                                                                                                                                                                                                                                                                                                                                                                                                                                                                                                                                                                                                                                                                                                                                                                                                                                                                                                                                                                                                                                                                                                                                                                                                                                                                                                                                                         | 2.74202400                                               | -1.43571500                                                                         | 2.55766900  |             |             |             |   |            |             |            |   |             |             |             |   |            |            |             |   |            |             |            |   |             |             |            |   |             |             |             |   |             |             |            |   |            |            |             |   |             |            |             |   |            |            |             |   |             |            |            |   |             |            |             |   |             |            |            |   |            |            |             |   |            |            |             |   |            |            |             |   |             |            |            |   |             |            |            |   |            |            |            |   |             |             |             |   |            |             |            |   |            |             |            |   |            |             |            |   |            |             |            |   |            |             |            |   |            |             |            |   |            |             |            |   |            |            |             |   |            |            |             |   |            |            |             |   |            |            |             |   |            |            |             |   |            |            |             |   |            |            |             |   |             |            |            |   |             |            |            |   |             |            |            |   |             |            |            |
| H                                                                                                                                                                                                                                                                                                                                                                                                                                                                                                                                                                                                                                                                                                                                                                                                                                                                                                                                                                                                                                                                                                                                                                                                                                                                                                                                                                                                                                                                                                                                                                                                                                                                                                                                                                                                                                                                                                                                                                                                                                                                                                                                                                                                                                                                                                                                                                                                                                                                                                                                                                                                                                                                                                                                                                                                                                                                                                                                                                                                                                                                                                                                                                                                                                         | 2.53399500                                               | -1.18119000                                                                         | 3.60134700  |             |             |             |   |            |             |            |   |             |             |             |   |            |            |             |   |            |             |            |   |             |             |            |   |             |             |             |   |             |             |            |   |            |            |             |   |             |            |             |   |            |            |             |   |             |            |            |   |             |            |             |   |             |            |            |   |            |            |             |   |            |            |             |   |            |            |             |   |             |            |            |   |             |            |            |   |            |            |            |   |             |             |             |   |            |             |            |   |            |             |            |   |            |             |            |   |            |             |            |   |            |             |            |   |            |             |            |   |            |             |            |   |            |            |             |   |            |            |             |   |            |            |             |   |            |            |             |   |            |            |             |   |            |            |             |   |            |            |             |   |             |            |            |   |             |            |            |   |             |            |            |   |             |            |            |
| H                                                                                                                                                                                                                                                                                                                                                                                                                                                                                                                                                                                                                                                                                                                                                                                                                                                                                                                                                                                                                                                                                                                                                                                                                                                                                                                                                                                                                                                                                                                                                                                                                                                                                                                                                                                                                                                                                                                                                                                                                                                                                                                                                                                                                                                                                                                                                                                                                                                                                                                                                                                                                                                                                                                                                                                                                                                                                                                                                                                                                                                                                                                                                                                                                                         | 3.74033200                                               | -1.04640300                                                                         | 2.33563500  |             |             |             |   |            |             |            |   |             |             |             |   |            |            |             |   |            |             |            |   |             |             |            |   |             |             |             |   |             |             |            |   |            |            |             |   |             |            |             |   |            |            |             |   |             |            |            |   |             |            |             |   |             |            |            |   |            |            |             |   |            |            |             |   |            |            |             |   |             |            |            |   |             |            |            |   |            |            |            |   |             |             |             |   |            |             |            |   |            |             |            |   |            |             |            |   |            |             |            |   |            |             |            |   |            |             |            |   |            |             |            |   |            |            |             |   |            |            |             |   |            |            |             |   |            |            |             |   |            |            |             |   |            |            |             |   |            |            |             |   |             |            |            |   |             |            |            |   |             |            |            |   |             |            |            |
| C                                                                                                                                                                                                                                                                                                                                                                                                                                                                                                                                                                                                                                                                                                                                                                                                                                                                                                                                                                                                                                                                                                                                                                                                                                                                                                                                                                                                                                                                                                                                                                                                                                                                                                                                                                                                                                                                                                                                                                                                                                                                                                                                                                                                                                                                                                                                                                                                                                                                                                                                                                                                                                                                                                                                                                                                                                                                                                                                                                                                                                                                                                                                                                                                                                         | 2.73193900                                               | -2.95285500                                                                         | 2.38627500  |             |             |             |   |            |             |            |   |             |             |             |   |            |            |             |   |            |             |            |   |             |             |            |   |             |             |             |   |             |             |            |   |            |            |             |   |             |            |             |   |            |            |             |   |             |            |            |   |             |            |             |   |             |            |            |   |            |            |             |   |            |            |             |   |            |            |             |   |             |            |            |   |             |            |            |   |            |            |            |   |             |             |             |   |            |             |            |   |            |             |            |   |            |             |            |   |            |             |            |   |            |             |            |   |            |             |            |   |            |             |            |   |            |            |             |   |            |            |             |   |            |            |             |   |            |            |             |   |            |            |             |   |            |            |             |   |            |            |             |   |             |            |            |   |             |            |            |   |             |            |            |   |             |            |            |
| H                                                                                                                                                                                                                                                                                                                                                                                                                                                                                                                                                                                                                                                                                                                                                                                                                                                                                                                                                                                                                                                                                                                                                                                                                                                                                                                                                                                                                                                                                                                                                                                                                                                                                                                                                                                                                                                                                                                                                                                                                                                                                                                                                                                                                                                                                                                                                                                                                                                                                                                                                                                                                                                                                                                                                                                                                                                                                                                                                                                                                                                                                                                                                                                                                                         | 2.96583500                                               | -3.23217400                                                                         | 1.35625300  |             |             |             |   |            |             |            |   |             |             |             |   |            |            |             |   |            |             |            |   |             |             |            |   |             |             |             |   |             |             |            |   |            |            |             |   |             |            |             |   |            |            |             |   |             |            |            |   |             |            |             |   |             |            |            |   |            |            |             |   |            |            |             |   |            |            |             |   |             |            |            |   |             |            |            |   |            |            |            |   |             |             |             |   |            |             |            |   |            |             |            |   |            |             |            |   |            |             |            |   |            |             |            |   |            |             |            |   |            |             |            |   |            |            |             |   |            |            |             |   |            |            |             |   |            |            |             |   |            |            |             |   |            |            |             |   |            |            |             |   |             |            |            |   |             |            |            |   |             |            |            |   |             |            |            |
| H                                                                                                                                                                                                                                                                                                                                                                                                                                                                                                                                                                                                                                                                                                                                                                                                                                                                                                                                                                                                                                                                                                                                                                                                                                                                                                                                                                                                                                                                                                                                                                                                                                                                                                                                                                                                                                                                                                                                                                                                                                                                                                                                                                                                                                                                                                                                                                                                                                                                                                                                                                                                                                                                                                                                                                                                                                                                                                                                                                                                                                                                                                                                                                                                                                         | 3.46775900                                               | -3.42664700                                                                         | 3.03820000  |             |             |             |   |            |             |            |   |             |             |             |   |            |            |             |   |            |             |            |   |             |             |            |   |             |             |             |   |             |             |            |   |            |            |             |   |             |            |             |   |            |            |             |   |             |            |            |   |             |            |             |   |             |            |            |   |            |            |             |   |            |            |             |   |            |            |             |   |             |            |            |   |             |            |            |   |            |            |            |   |             |             |             |   |            |             |            |   |            |             |            |   |            |             |            |   |            |             |            |   |            |             |            |   |            |             |            |   |            |             |            |   |            |            |             |   |            |            |             |   |            |            |             |   |            |            |             |   |            |            |             |   |            |            |             |   |            |            |             |   |             |            |            |   |             |            |            |   |             |            |            |   |             |            |            |
| H                                                                                                                                                                                                                                                                                                                                                                                                                                                                                                                                                                                                                                                                                                                                                                                                                                                                                                                                                                                                                                                                                                                                                                                                                                                                                                                                                                                                                                                                                                                                                                                                                                                                                                                                                                                                                                                                                                                                                                                                                                                                                                                                                                                                                                                                                                                                                                                                                                                                                                                                                                                                                                                                                                                                                                                                                                                                                                                                                                                                                                                                                                                                                                                                                                         | 1.75077900                                               | -3.36746300                                                                         | 2.62905700  |             |             |             |   |            |             |            |   |             |             |             |   |            |            |             |   |            |             |            |   |             |             |            |   |             |             |             |   |             |             |            |   |            |            |             |   |             |            |             |   |            |            |             |   |             |            |            |   |             |            |             |   |             |            |            |   |            |            |             |   |            |            |             |   |            |            |             |   |             |            |            |   |             |            |            |   |            |            |            |   |             |             |             |   |            |             |            |   |            |             |            |   |            |             |            |   |            |             |            |   |            |             |            |   |            |             |            |   |            |             |            |   |            |            |             |   |            |            |             |   |            |            |             |   |            |            |             |   |            |            |             |   |            |            |             |   |            |            |             |   |             |            |            |   |             |            |            |   |             |            |            |   |             |            |            |
| C                                                                                                                                                                                                                                                                                                                                                                                                                                                                                                                                                                                                                                                                                                                                                                                                                                                                                                                                                                                                                                                                                                                                                                                                                                                                                                                                                                                                                                                                                                                                                                                                                                                                                                                                                                                                                                                                                                                                                                                                                                                                                                                                                                                                                                                                                                                                                                                                                                                                                                                                                                                                                                                                                                                                                                                                                                                                                                                                                                                                                                                                                                                                                                                                                                         | 2.50454600                                               | 1.58283200                                                                          | -2.46793300 |             |             |             |   |            |             |            |   |             |             |             |   |            |            |             |   |            |             |            |   |             |             |            |   |             |             |             |   |             |             |            |   |            |            |             |   |             |            |             |   |            |            |             |   |             |            |            |   |             |            |             |   |             |            |            |   |            |            |             |   |            |            |             |   |            |            |             |   |             |            |            |   |             |            |            |   |            |            |            |   |             |             |             |   |            |             |            |   |            |             |            |   |            |             |            |   |            |             |            |   |            |             |            |   |            |             |            |   |            |             |            |   |            |            |             |   |            |            |             |   |            |            |             |   |            |            |             |   |            |            |             |   |            |            |             |   |            |            |             |   |             |            |            |   |             |            |            |   |             |            |            |   |             |            |            |
| H                                                                                                                                                                                                                                                                                                                                                                                                                                                                                                                                                                                                                                                                                                                                                                                                                                                                                                                                                                                                                                                                                                                                                                                                                                                                                                                                                                                                                                                                                                                                                                                                                                                                                                                                                                                                                                                                                                                                                                                                                                                                                                                                                                                                                                                                                                                                                                                                                                                                                                                                                                                                                                                                                                                                                                                                                                                                                                                                                                                                                                                                                                                                                                                                                                         | 1.85241800                                               | 2.35794300                                                                          | -2.88095000 |             |             |             |   |            |             |            |   |             |             |             |   |            |            |             |   |            |             |            |   |             |             |            |   |             |             |             |   |             |             |            |   |            |            |             |   |             |            |             |   |            |            |             |   |             |            |            |   |             |            |             |   |             |            |            |   |            |            |             |   |            |            |             |   |            |            |             |   |             |            |            |   |             |            |            |   |            |            |            |   |             |             |             |   |            |             |            |   |            |             |            |   |            |             |            |   |            |             |            |   |            |             |            |   |            |             |            |   |            |             |            |   |            |            |             |   |            |            |             |   |            |            |             |   |            |            |             |   |            |            |             |   |            |            |             |   |            |            |             |   |             |            |            |   |             |            |            |   |             |            |            |   |             |            |            |
| H                                                                                                                                                                                                                                                                                                                                                                                                                                                                                                                                                                                                                                                                                                                                                                                                                                                                                                                                                                                                                                                                                                                                                                                                                                                                                                                                                                                                                                                                                                                                                                                                                                                                                                                                                                                                                                                                                                                                                                                                                                                                                                                                                                                                                                                                                                                                                                                                                                                                                                                                                                                                                                                                                                                                                                                                                                                                                                                                                                                                                                                                                                                                                                                                                                         | 2.12257000                                               | 0.62623300                                                                          | -2.83698600 |             |             |             |   |            |             |            |   |             |             |             |   |            |            |             |   |            |             |            |   |             |             |            |   |             |             |             |   |             |             |            |   |            |            |             |   |             |            |             |   |            |            |             |   |             |            |            |   |             |            |             |   |             |            |            |   |            |            |             |   |            |            |             |   |            |            |             |   |             |            |            |   |             |            |            |   |            |            |            |   |             |             |             |   |            |             |            |   |            |             |            |   |            |             |            |   |            |             |            |   |            |             |            |   |            |             |            |   |            |             |            |   |            |            |             |   |            |            |             |   |            |            |             |   |            |            |             |   |            |            |             |   |            |            |             |   |            |            |             |   |             |            |            |   |             |            |            |   |             |            |            |   |             |            |            |
| C                                                                                                                                                                                                                                                                                                                                                                                                                                                                                                                                                                                                                                                                                                                                                                                                                                                                                                                                                                                                                                                                                                                                                                                                                                                                                                                                                                                                                                                                                                                                                                                                                                                                                                                                                                                                                                                                                                                                                                                                                                                                                                                                                                                                                                                                                                                                                                                                                                                                                                                                                                                                                                                                                                                                                                                                                                                                                                                                                                                                                                                                                                                                                                                                                                         | 3.93301000                                               | 1.79194600                                                                          | -2.96457200 |             |             |             |   |            |             |            |   |             |             |             |   |            |            |             |   |            |             |            |   |             |             |            |   |             |             |             |   |             |             |            |   |            |            |             |   |             |            |             |   |            |            |             |   |             |            |            |   |             |            |             |   |             |            |            |   |            |            |             |   |            |            |             |   |            |            |             |   |             |            |            |   |             |            |            |   |            |            |            |   |             |             |             |   |            |             |            |   |            |             |            |   |            |             |            |   |            |             |            |   |            |             |            |   |            |             |            |   |            |             |            |   |            |            |             |   |            |            |             |   |            |            |             |   |            |            |             |   |            |            |             |   |            |            |             |   |            |            |             |   |             |            |            |   |             |            |            |   |             |            |            |   |             |            |            |
| H                                                                                                                                                                                                                                                                                                                                                                                                                                                                                                                                                                                                                                                                                                                                                                                                                                                                                                                                                                                                                                                                                                                                                                                                                                                                                                                                                                                                                                                                                                                                                                                                                                                                                                                                                                                                                                                                                                                                                                                                                                                                                                                                                                                                                                                                                                                                                                                                                                                                                                                                                                                                                                                                                                                                                                                                                                                                                                                                                                                                                                                                                                                                                                                                                                         | 4.59668700                                               | 1.00910600                                                                          | -2.58975300 |             |             |             |   |            |             |            |   |             |             |             |   |            |            |             |   |            |             |            |   |             |             |            |   |             |             |             |   |             |             |            |   |            |            |             |   |             |            |             |   |            |            |             |   |             |            |            |   |             |            |             |   |             |            |            |   |            |            |             |   |            |            |             |   |            |            |             |   |             |            |            |   |             |            |            |   |            |            |            |   |             |             |             |   |            |             |            |   |            |             |            |   |            |             |            |   |            |             |            |   |            |             |            |   |            |             |            |   |            |             |            |   |            |            |             |   |            |            |             |   |            |            |             |   |            |            |             |   |            |            |             |   |            |            |             |   |            |            |             |   |             |            |            |   |             |            |            |   |             |            |            |   |             |            |            |
| H                                                                                                                                                                                                                                                                                                                                                                                                                                                                                                                                                                                                                                                                                                                                                                                                                                                                                                                                                                                                                                                                                                                                                                                                                                                                                                                                                                                                                                                                                                                                                                                                                                                                                                                                                                                                                                                                                                                                                                                                                                                                                                                                                                                                                                                                                                                                                                                                                                                                                                                                                                                                                                                                                                                                                                                                                                                                                                                                                                                                                                                                                                                                                                                                                                         | 3.97615600                                               | 1.77428300                                                                          | -4.05482800 |             |             |             |   |            |             |            |   |             |             |             |   |            |            |             |   |            |             |            |   |             |             |            |   |             |             |             |   |             |             |            |   |            |            |             |   |             |            |             |   |            |            |             |   |             |            |            |   |             |            |             |   |             |            |            |   |            |            |             |   |            |            |             |   |            |            |             |   |             |            |            |   |             |            |            |   |            |            |            |   |             |             |             |   |            |             |            |   |            |             |            |   |            |             |            |   |            |             |            |   |            |             |            |   |            |             |            |   |            |             |            |   |            |            |             |   |            |            |             |   |            |            |             |   |            |            |             |   |            |            |             |   |            |            |             |   |            |            |             |   |             |            |            |   |             |            |            |   |             |            |            |   |             |            |            |
| H                                                                                                                                                                                                                                                                                                                                                                                                                                                                                                                                                                                                                                                                                                                                                                                                                                                                                                                                                                                                                                                                                                                                                                                                                                                                                                                                                                                                                                                                                                                                                                                                                                                                                                                                                                                                                                                                                                                                                                                                                                                                                                                                                                                                                                                                                                                                                                                                                                                                                                                                                                                                                                                                                                                                                                                                                                                                                                                                                                                                                                                                                                                                                                                                                                         | 4.32797700                                               | 2.75371100                                                                          | -2.62835500 |             |             |             |   |            |             |            |   |             |             |             |   |            |            |             |   |            |             |            |   |             |             |            |   |             |             |             |   |             |             |            |   |            |            |             |   |             |            |             |   |            |            |             |   |             |            |            |   |             |            |             |   |             |            |            |   |            |            |             |   |            |            |             |   |            |            |             |   |             |            |            |   |             |            |            |   |            |            |            |   |             |             |             |   |            |             |            |   |            |             |            |   |            |             |            |   |            |             |            |   |            |             |            |   |            |             |            |   |            |             |            |   |            |            |             |   |            |            |             |   |            |            |             |   |            |            |             |   |            |            |             |   |            |            |             |   |            |            |             |   |             |            |            |   |             |            |            |   |             |            |            |   |             |            |            |
| C                                                                                                                                                                                                                                                                                                                                                                                                                                                                                                                                                                                                                                                                                                                                                                                                                                                                                                                                                                                                                                                                                                                                                                                                                                                                                                                                                                                                                                                                                                                                                                                                                                                                                                                                                                                                                                                                                                                                                                                                                                                                                                                                                                                                                                                                                                                                                                                                                                                                                                                                                                                                                                                                                                                                                                                                                                                                                                                                                                                                                                                                                                                                                                                                                                         | -3.05133700                                              | 2.01955000                                                                          | 1.40645900  |             |             |             |   |            |             |            |   |             |             |             |   |            |            |             |   |            |             |            |   |             |             |            |   |             |             |             |   |             |             |            |   |            |            |             |   |             |            |             |   |            |            |             |   |             |            |            |   |             |            |             |   |             |            |            |   |            |            |             |   |            |            |             |   |            |            |             |   |             |            |            |   |             |            |            |   |            |            |            |   |             |             |             |   |            |             |            |   |            |             |            |   |            |             |            |   |            |             |            |   |            |             |            |   |            |             |            |   |            |             |            |   |            |            |             |   |            |            |             |   |            |            |             |   |            |            |             |   |            |            |             |   |            |            |             |   |            |            |             |   |             |            |            |   |             |            |            |   |             |            |            |   |             |            |            |
| H                                                                                                                                                                                                                                                                                                                                                                                                                                                                                                                                                                                                                                                                                                                                                                                                                                                                                                                                                                                                                                                                                                                                                                                                                                                                                                                                                                                                                                                                                                                                                                                                                                                                                                                                                                                                                                                                                                                                                                                                                                                                                                                                                                                                                                                                                                                                                                                                                                                                                                                                                                                                                                                                                                                                                                                                                                                                                                                                                                                                                                                                                                                                                                                                                                         | -3.00377700                                              | 2.16873600                                                                          | 2.48926600  |             |             |             |   |            |             |            |   |             |             |             |   |            |            |             |   |            |             |            |   |             |             |            |   |             |             |             |   |             |             |            |   |            |            |             |   |             |            |             |   |            |            |             |   |             |            |            |   |             |            |             |   |             |            |            |   |            |            |             |   |            |            |             |   |            |            |             |   |             |            |            |   |             |            |            |   |            |            |            |   |             |             |             |   |            |             |            |   |            |             |            |   |            |             |            |   |            |             |            |   |            |             |            |   |            |             |            |   |            |             |            |   |            |            |             |   |            |            |             |   |            |            |             |   |            |            |             |   |            |            |             |   |            |            |             |   |            |            |             |   |             |            |            |   |             |            |            |   |             |            |            |   |             |            |            |
| H                                                                                                                                                                                                                                                                                                                                                                                                                                                                                                                                                                                                                                                                                                                                                                                                                                                                                                                                                                                                                                                                                                                                                                                                                                                                                                                                                                                                                                                                                                                                                                                                                                                                                                                                                                                                                                                                                                                                                                                                                                                                                                                                                                                                                                                                                                                                                                                                                                                                                                                                                                                                                                                                                                                                                                                                                                                                                                                                                                                                                                                                                                                                                                                                                                         | -3.35447200                                              | 0.98049200                                                                          | 1.24696800  |             |             |             |   |            |             |            |   |             |             |             |   |            |            |             |   |            |             |            |   |             |             |            |   |             |             |             |   |             |             |            |   |            |            |             |   |             |            |             |   |            |            |             |   |             |            |            |   |             |            |             |   |             |            |            |   |            |            |             |   |            |            |             |   |            |            |             |   |             |            |            |   |             |            |            |   |            |            |            |   |             |             |             |   |            |             |            |   |            |             |            |   |            |             |            |   |            |             |            |   |            |             |            |   |            |             |            |   |            |             |            |   |            |            |             |   |            |            |             |   |            |            |             |   |            |            |             |   |            |            |             |   |            |            |             |   |            |            |             |   |             |            |            |   |             |            |            |   |             |            |            |   |             |            |            |
| C                                                                                                                                                                                                                                                                                                                                                                                                                                                                                                                                                                                                                                                                                                                                                                                                                                                                                                                                                                                                                                                                                                                                                                                                                                                                                                                                                                                                                                                                                                                                                                                                                                                                                                                                                                                                                                                                                                                                                                                                                                                                                                                                                                                                                                                                                                                                                                                                                                                                                                                                                                                                                                                                                                                                                                                                                                                                                                                                                                                                                                                                                                                                                                                                                                         | -4.09290200                                              | 2.95715200                                                                          | 0.80075900  |             |             |             |   |            |             |            |   |             |             |             |   |            |            |             |   |            |             |            |   |             |             |            |   |             |             |             |   |             |             |            |   |            |            |             |   |             |            |             |   |            |            |             |   |             |            |            |   |             |            |             |   |             |            |            |   |            |            |             |   |            |            |             |   |            |            |             |   |             |            |            |   |             |            |            |   |            |            |            |   |             |             |             |   |            |             |            |   |            |             |            |   |            |             |            |   |            |             |            |   |            |             |            |   |            |             |            |   |            |             |            |   |            |            |             |   |            |            |             |   |            |            |             |   |            |            |             |   |            |            |             |   |            |            |             |   |            |            |             |   |             |            |            |   |             |            |            |   |             |            |            |   |             |            |            |

|                       |                                                                                     |                                                                                      |   |             |             |             |
|-----------------------|-------------------------------------------------------------------------------------|--------------------------------------------------------------------------------------|---|-------------|-------------|-------------|
|                       |                                                                                     |                                                                                      | H | -4.18218100 | 2.79898000  | -0.27661000 |
|                       |                                                                                     |                                                                                      | H | -5.07550300 | 2.79259700  | 1.24609900  |
|                       |                                                                                     |                                                                                      | H | -3.82122700 | 4.00300600  | 0.96332600  |
| 7                     | 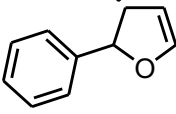   |    |   |             |             |             |
| Cartesian Coordinates |                                                                                     |                                                                                      |   |             |             |             |
|                       |                                                                                     |                                                                                      | C | 1.01056000  | -0.79126000 | -0.10123400 |
|                       |                                                                                     |                                                                                      | C | 1.81799500  | -0.48364300 | 1.12719400  |
|                       |                                                                                     |                                                                                      | O | 1.72990600  | -0.08727800 | -1.16790700 |
|                       |                                                                                     |                                                                                      | C | 2.88599300  | 0.30713300  | 0.75323200  |
|                       |                                                                                     |                                                                                      | H | 1.56092700  | -0.83773700 | 2.11160000  |
|                       |                                                                                     |                                                                                      | C | 2.81470400  | 0.52253100  | -0.60993900 |
|                       |                                                                                     |                                                                                      | H | 3.65360600  | 0.70565400  | 1.39830200  |
|                       |                                                                                     |                                                                                      | H | 3.44447000  | 1.08545100  | -1.27863700 |
|                       |                                                                                     |                                                                                      | H | 1.03679300  | -1.85792400 | -0.35841900 |
|                       |                                                                                     |                                                                                      | C | -0.43309500 | -0.33691400 | -0.05726100 |
|                       |                                                                                     |                                                                                      | C | -1.46864300 | -1.26570200 | -0.10520600 |
|                       |                                                                                     |                                                                                      | C | -0.73801900 | 1.02054600  | 0.05663100  |
|                       |                                                                                     |                                                                                      | C | -2.79564300 | -0.84770300 | -0.03366600 |
|                       |                                                                                     |                                                                                      | H | -1.23917700 | -2.32062500 | -0.20035900 |
|                       |                                                                                     |                                                                                      | C | -2.06000100 | 1.44064900  | 0.11608400  |
|                       |                                                                                     |                                                                                      | H | 0.06613000  | 1.74494000  | 0.09552500  |
|                       |                                                                                     |                                                                                      | C | -3.09336900 | 0.50567000  | 0.07439500  |
|                       |                                                                                     |                                                                                      | H | -3.59343200 | -1.57887700 | -0.06950600 |
|                       |                                                                                     |                                                                                      | H | -2.28740500 | 2.49609500  | 0.19883200  |
|                       |                                                                                     |                                                                                      | H | -4.12405300 | 0.83340000  | 0.12454400  |
| 8                     |  |  |   |             |             |             |
| Cartesian Coordinates |                                                                                     |                                                                                      |   |             |             |             |
|                       |                                                                                     |                                                                                      | C | 0.43854900  | 0.05818500  | 0.00007900  |
|                       |                                                                                     |                                                                                      | C | 1.10275200  | -1.17624700 | 0.00010600  |
|                       |                                                                                     |                                                                                      | C | 1.20696500  | 1.23187400  | -0.00002700 |
|                       |                                                                                     |                                                                                      | C | 2.49078300  | -1.23188600 | 0.00006600  |
|                       |                                                                                     |                                                                                      | H | 0.52734600  | -2.09171000 | 0.00016200  |
|                       |                                                                                     |                                                                                      | C | 2.59245400  | 1.17011600  | -0.00006900 |
|                       |                                                                                     |                                                                                      | H | 0.71755900  | 2.19705700  | -0.00008100 |
|                       |                                                                                     |                                                                                      | C | 3.24348700  | -0.06181400 | -0.00001700 |
|                       |                                                                                     |                                                                                      | H | 2.98579200  | -2.19493300 | 0.00009700  |
|                       |                                                                                     |                                                                                      | H | 3.16765200  | 2.08742500  | -0.00014100 |
|                       |                                                                                     |                                                                                      | H | 4.32490600  | -0.10759100 | -0.00005300 |
|                       |                                                                                     |                                                                                      | C | -1.01432500 | 0.13027000  | 0.00010000  |
|                       |                                                                                     |                                                                                      | C | -1.90433700 | 1.16760200  | 0.00001100  |
|                       |                                                                                     |                                                                                      | O | -1.70718200 | -1.05210500 | -0.00032200 |
|                       |                                                                                     |                                                                                      | C | -3.21114200 | 0.59364000  | 0.00007300  |
|                       |                                                                                     |                                                                                      | H | -1.66263600 | 2.21673900  | 0.00002600  |
|                       |                                                                                     |                                                                                      | C | -3.03506700 | -0.75127300 | 0.00007000  |
|                       |                                                                                     |                                                                                      | H | -4.15323100 | 1.11581200  | 0.00014100  |
|                       |                                                                                     |                                                                                      | H | -3.71063900 | -1.58876300 | 0.00007700  |
| 9                     |  |  |   |             |             |             |

|                       |                                                                                     |                                                                                      |             |
|-----------------------|-------------------------------------------------------------------------------------|--------------------------------------------------------------------------------------|-------------|
| Cartesian Coordinates |                                                                                     |                                                                                      |             |
| C                     | 0.76509900                                                                          | -0.47190300                                                                          | 0.66871000  |
| C                     | 1.54147900                                                                          | 0.67320500                                                                           | 1.25482600  |
| C                     | 2.67972000                                                                          | 1.02296800                                                                           | 0.57521900  |
| H                     | 1.17803100                                                                          | 1.16542800                                                                           | 2.14551200  |
| C                     | 2.94803700                                                                          | 0.25748600                                                                           | -0.55898600 |
| H                     | 3.32894100                                                                          | 1.83270400                                                                           | 0.88250100  |
| H                     | 3.77894800                                                                          | 0.37332100                                                                           | -1.23707000 |
| H                     | 0.77970300                                                                          | -1.33598500                                                                          | 1.33973300  |
| C                     | -0.67550300                                                                         | -0.16807800                                                                          | 0.31603100  |
| C                     | -1.68194000                                                                         | -1.08164200                                                                          | 0.62479000  |
| C                     | -1.01729300                                                                         | 1.02072400                                                                           | -0.33236700 |
| C                     | -3.00775600                                                                         | -0.81498400                                                                          | 0.29340500  |
| H                     | -1.42824900                                                                         | -2.00716400                                                                          | 1.12829300  |
| C                     | -2.33868500                                                                         | 1.28929600                                                                           | -0.66369000 |
| H                     | -0.24038700                                                                         | 1.73473800                                                                           | -0.57700800 |
| C                     | -3.33949500                                                                         | 0.37096300                                                                           | -0.35171600 |
| H                     | -3.77892700                                                                         | -1.53369200                                                                          | 0.54080900  |
| H                     | -2.59032500                                                                         | 2.21566100                                                                           | -1.16480300 |
| H                     | -4.36982100                                                                         | 0.58091200                                                                           | -0.60953900 |
| S                     | 1.75625700                                                                          | -0.97588300                                                                          | -0.83786000 |
| 10                    | 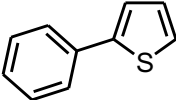   |    |             |
| Cartesian Coordinates |                                                                                     |                                                                                      |             |
| C                     | 1.07746083                                                                          | 0.12122117                                                                           | 0.00474500  |
| C                     | 1.73106283                                                                          | -1.08982083                                                                          | 0.27180700  |
| C                     | 1.86281283                                                                          | 1.24666717                                                                           | -0.28526000 |
| C                     | 3.11736483                                                                          | -1.17237383                                                                          | 0.24994800  |
| H                     | 1.15154583                                                                          | -1.97146583                                                                          | 0.51604300  |
| C                     | 3.24859083                                                                          | 1.16406717                                                                           | -0.29611900 |
| H                     | 1.38319183                                                                          | 2.18773417                                                                           | -0.52036400 |
| C                     | 3.88423083                                                                          | -0.04576483                                                                          | -0.03068300 |
| H                     | 3.59933283                                                                          | -2.11857483                                                                          | 0.46135900  |
| H                     | 3.83400583                                                                          | 2.04609917                                                                           | -0.52367100 |
| H                     | 4.96464583                                                                          | -0.10973683                                                                          | -0.04440300 |
| C                     | -0.38489817                                                                         | 0.22979217                                                                           | 0.02874900  |
| C                     | -1.14929317                                                                         | 1.34012017                                                                           | 0.29504300  |
| C                     | -2.54588317                                                                         | 1.09788417                                                                           | 0.22997200  |
| H                     | -0.72151317                                                                         | 2.29832417                                                                           | 0.55291800  |
| C                     | -2.84207417                                                                         | -0.19633783                                                                          | -0.08951600 |
| H                     | -3.29735317                                                                         | 1.85136917                                                                           | 0.41852600  |
| H                     | -3.81246417                                                                         | -0.65189383                                                                          | -0.20535300 |
| S                     | -1.41591717                                                                         | -1.12918183                                                                          | -0.31398300 |
| 11                    |  |  |             |
| Cartesian Coordinates |                                                                                     |                                                                                      |             |
| C                     | 2.03167800                                                                          | 0.64048600                                                                           | 0.26967000  |
| C                     | 2.60590200                                                                          | 1.24456000                                                                           | -0.99026000 |
| N                     | 2.80921100                                                                          | -0.59634600                                                                          | 0.40147300  |
| C                     | 3.67972100                                                                          | 0.47759900                                                                           | -1.39629200 |
| C                     | 3.82574000                                                                          | -0.60095100                                                                          | -0.52631100 |
| H                     | 4.30186600                                                                          | 0.65493900                                                                           | -2.26049900 |
| H                     | 4.55364200                                                                          | -1.39615300                                                                          | -0.53738800 |
| C                     | 2.87681200                                                                          | -1.27363500                                                                          | 1.67505700  |
| H                     | 1.86899600                                                                          | -1.49021900                                                                          | 2.03214100  |
| H                     | 3.41043500                                                                          | -2.21624600                                                                          | 1.55982000  |
| H                     | 3.39063500                                                                          | -0.66946600                                                                          | 2.43451500  |
| H                     | 2.21493300                                                                          | 2.13989000                                                                           | -1.44504000 |
| H                     | 2.23204300                                                                          | 1.28870600                                                                           | 1.14355800  |
| C                     | 0.53017200                                                                          | 0.41459000                                                                           | 0.20652000  |
| C                     | -0.34169500                                                                         | 1.39073300                                                                           | 0.69323200  |

|                       |                                                                                     |                                                                                      |             |
|-----------------------|-------------------------------------------------------------------------------------|--------------------------------------------------------------------------------------|-------------|
| C                     | -0.00258700                                                                         | -0.73372100                                                                          | -0.37638300 |
| C                     | -1.71281400                                                                         | 1.22674900                                                                           | 0.59105600  |
| H                     | 0.06071800                                                                          | 2.28298300                                                                           | 1.15860500  |
| C                     | -1.37584300                                                                         | -0.90585600                                                                          | -0.47092900 |
| H                     | 0.66754300                                                                          | -1.49693100                                                                          | -0.74974000 |
| C                     | -2.25228900                                                                         | 0.07444400                                                                           | 0.00840500  |
| H                     | -2.38619100                                                                         | 1.98385800                                                                           | 0.96950200  |
| H                     | -1.75803000                                                                         | -1.81097400                                                                          | -0.92213700 |
| C                     | -3.73463900                                                                         | -0.06943000                                                                          | -0.07482400 |
| C                     | -4.31130200                                                                         | -1.32976400                                                                          | -0.67522400 |
| O                     | -4.47281800                                                                         | 0.81317900                                                                           | 0.33512800  |
| H                     | -5.39677300                                                                         | -1.27241000                                                                          | -0.65372000 |
| H                     | -3.97376400                                                                         | -1.45536500                                                                          | -1.70606500 |
| H                     | -3.98112600                                                                         | -2.20844000                                                                          | -0.11719900 |
| <b>12</b>             | 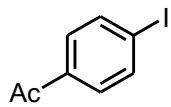   |    |             |
| Cartesian Coordinates |                                                                                     |                                                                                      |             |
| I                     | -0.59563195                                                                         | 0.05279575                                                                           | 1.17709436  |
| C                     | 1.51774005                                                                          | 0.09628675                                                                           | 1.17695936  |
| C                     | 2.17926505                                                                          | 1.32259075                                                                           | 1.17688436  |
| C                     | 2.22705205                                                                          | -1.09941225                                                                          | 1.17698536  |
| C                     | 3.56460505                                                                          | 1.34108175                                                                           | 1.17693036  |
| H                     | 1.62474205                                                                          | 2.25046775                                                                           | 1.17679936  |
| C                     | 3.61595705                                                                          | -1.06464225                                                                          | 1.17695536  |
| H                     | 1.71197505                                                                          | -2.04945625                                                                          | 1.17703436  |
| C                     | 4.30203405                                                                          | 0.15259675                                                                           | 1.17696336  |
| H                     | 4.09247305                                                                          | 2.28493575                                                                           | 1.17692836  |
| H                     | 4.15276305                                                                          | -2.00276925                                                                          | 1.17693836  |
| C                     | 5.79538005                                                                          | 0.22902775                                                                           | 1.17709136  |
| C                     | 6.58927705                                                                          | -1.05414825                                                                          | 1.17707736  |
| H                     | 7.65051605                                                                          | -0.81849125                                                                          | 1.17689736  |
| H                     | 6.34979705                                                                          | -1.65550325                                                                          | 2.05667936  |
| H                     | 6.34949305                                                                          | -1.65573925                                                                          | 0.29773836  |
| O                     | 6.35982405                                                                          | 1.31044175                                                                           | 1.17725936  |
| <b>13</b>             |  |  |             |
| Cartesian Coordinates |                                                                                     |                                                                                      |             |
| C                     | 4.47967953                                                                          | 6.04760489                                                                           | -0.76846889 |
| C                     | 5.17720097                                                                          | 4.84008319                                                                           | -0.72573001 |
| C                     | 5.17718514                                                                          | 7.25474990                                                                           | -0.81130570 |
| C                     | 6.57191289                                                                          | 4.83982576                                                                           | -0.72514984 |
| H                     | 4.62700792                                                                          | 3.88859162                                                                           | -0.69118757 |
| C                     | 6.57232301                                                                          | 7.25463029                                                                           | -0.81172682 |
| H                     | 4.62758785                                                                          | 8.20655072                                                                           | -0.84517366 |
| C                     | 7.26974433                                                                          | 6.04745434                                                                           | -0.76852084 |
| H                     | 7.12177576                                                                          | 3.88810652                                                                           | -0.69083036 |
| H                     | 7.12200802                                                                          | 8.20655009                                                                           | -0.84592229 |
| C                     | 2.93967953                                                                          | 6.04760489                                                                           | -0.76846889 |
| C                     | 2.03648919                                                                          | 7.11904684                                                                           | -0.80639138 |
| N                     | 2.21299831                                                                          | 4.86131322                                                                           | -0.72645852 |
| C                     | 0.71496360                                                                          | 6.56045241                                                                           | -0.78643276 |
| H                     | 2.28873909                                                                          | 8.17346190                                                                           | -0.84373789 |
| C                     | 0.85513709                                                                          | 5.16660155                                                                           | -0.73709460 |
| H                     | -0.21780461                                                                         | 7.11398250                                                                           | -0.80593264 |
| H                     | 0.09623867                                                                          | 4.38569742                                                                           | -0.70943790 |
| C                     | 2.78543651                                                                          | 3.50820753                                                                           | -0.67829725 |
| H                     | 3.72901529                                                                          | 3.53784143                                                                           | -0.17462977 |
| H                     | 2.11963954                                                                          | 2.85784835                                                                           | -0.15042669 |
| H                     | 2.92432741                                                                          | 3.14401914                                                                           | -1.67477913 |
| C                     | 8.80974409                                                                          | 6.04681731                                                                           | -0.76795050 |
| C                     | 9.57900348                                                                          | 5.05287186                                                                           | 0.12194412  |

|                       |                                                                                     |                                                                                     |             |
|-----------------------|-------------------------------------------------------------------------------------|-------------------------------------------------------------------------------------|-------------|
| O                     | 9.42533542                                                                          | 6.84017403                                                                          | -1.47825495 |
| H                     | 10.51401196                                                                         | 5.48426025                                                                          | 0.41274163  |
| H                     | 9.00031861                                                                          | 4.83399237                                                                          | 0.99493645  |
| H                     | 9.75716529                                                                          | 4.14976448                                                                          | -0.42354231 |
| <b>14</b>             | 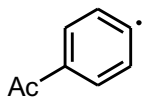   |   |             |
| Cartesian Coordinates |                                                                                     |                                                                                     |             |
| C                     | 2.57486800                                                                          | 0.13134700                                                                          | 0.00003000  |
| C                     | 2.03991800                                                                          | -1.13369700                                                                         | 0.00001100  |
| C                     | 1.87078000                                                                          | 1.30730600                                                                          | -0.00000400 |
| C                     | 0.64899200                                                                          | -1.21690800                                                                         | -0.00007500 |
| H                     | 2.65133700                                                                          | -2.02705300                                                                         | 0.00000900  |
| C                     | 0.47742800                                                                          | 1.19881400                                                                          | 0.00001100  |
| H                     | 2.35082300                                                                          | 2.27746200                                                                          | 0.00001000  |
| C                     | -0.13907100                                                                         | -0.05819900                                                                         | 0.00001100  |
| H                     | 0.16078900                                                                          | -2.18248500                                                                         | -0.00009600 |
| H                     | -0.11228400                                                                         | 2.10533600                                                                          | -0.00001500 |
| C                     | -1.62724600                                                                         | -0.20856600                                                                         | 0.00000900  |
| C                     | -2.48578100                                                                         | 1.03295900                                                                          | -0.00002900 |
| H                     | -3.53336100                                                                         | 0.74257000                                                                          | 0.00008800  |
| H                     | -2.27754000                                                                         | 1.64567000                                                                          | 0.87949000  |
| H                     | -2.27768800                                                                         | 1.64560000                                                                          | -0.87961000 |
| O                     | -2.14017500                                                                         | -1.31568000                                                                         | 0.00004300  |
| <b>15</b>             |  |  |             |
| Cartesian Coordinates |                                                                                     |                                                                                     |             |
| C                     | -1.49291736                                                                         | 1.97368192                                                                          | -0.69015833 |
| C                     | -0.53584836                                                                         | 1.65146092                                                                          | 0.48242467  |
| N                     | -1.54255636                                                                         | 3.43954792                                                                          | -0.68595333 |
| C                     | -0.33359936                                                                         | 2.92151092                                                                          | 1.16164467  |
| C                     | -0.86736636                                                                         | 3.90626692                                                                          | 0.40133367  |
| H                     | 0.19934464                                                                          | 3.05188092                                                                          | 2.08744267  |
| H                     | -0.83257336                                                                         | 4.97160592                                                                          | 0.58443467  |
| C                     | -1.81928936                                                                         | 4.18683792                                                                          | -1.88789833 |
| H                     | -2.75077736                                                                         | 3.83531392                                                                          | -2.33543833 |
| H                     | -1.93765236                                                                         | 5.24174692                                                                          | -1.63998633 |
| H                     | -1.01762136                                                                         | 4.09226692                                                                          | -2.63063933 |
| H                     | -1.08982136                                                                         | 1.62719692                                                                          | -1.64071033 |
| C                     | -2.85513236                                                                         | 1.33550092                                                                          | -0.47666733 |
| C                     | -3.11794536                                                                         | 0.08588292                                                                          | -1.03568233 |
| C                     | -3.83010936                                                                         | 1.94634292                                                                          | 0.30933367  |
| C                     | -4.33637436                                                                         | -0.54518308                                                                         | -0.81236633 |
| H                     | -2.36461136                                                                         | -0.39550108                                                                         | -1.64849033 |
| C                     | -5.04882736                                                                         | 1.31669492                                                                          | 0.53260467  |
| H                     | -3.63117936                                                                         | 2.91787992                                                                          | 0.74258167  |
| C                     | -5.30524636                                                                         | 0.06915892                                                                          | -0.02688733 |
| H                     | -4.53025536                                                                         | -1.51351808                                                                         | -1.25629833 |
| H                     | -5.79945436                                                                         | 1.80076092                                                                          | 1.14487267  |
| H                     | -6.25580336                                                                         | -0.41946908                                                                         | 0.14566567  |
| H                     | -0.81427836                                                                         | 0.78464792                                                                          | 1.06542467  |
| I                     | 1.50289464                                                                          | 0.79589292                                                                          | -0.33320333 |



|                                                                                                                                                                                                                                                                                                                                                                                                                                                                                                                                                                                                                                                                                                                                                                                                                                                                                                                                                                                                                                                                                                                                                                                                                                                                                                                                                                                                                                                                                                                                                                                                                                                                                                                                                                                           |                                                                                     |                                                                                      |             |             |            |             |   |            |             |             |   |            |            |            |   |            |            |             |   |            |            |             |   |            |            |             |   |            |            |             |   |             |             |             |   |             |             |             |   |             |             |             |   |             |             |            |   |             |             |             |   |             |             |             |   |             |             |            |   |             |             |            |   |             |             |             |   |             |             |             |   |             |             |             |   |             |             |             |   |            |            |             |   |            |             |             |
|-------------------------------------------------------------------------------------------------------------------------------------------------------------------------------------------------------------------------------------------------------------------------------------------------------------------------------------------------------------------------------------------------------------------------------------------------------------------------------------------------------------------------------------------------------------------------------------------------------------------------------------------------------------------------------------------------------------------------------------------------------------------------------------------------------------------------------------------------------------------------------------------------------------------------------------------------------------------------------------------------------------------------------------------------------------------------------------------------------------------------------------------------------------------------------------------------------------------------------------------------------------------------------------------------------------------------------------------------------------------------------------------------------------------------------------------------------------------------------------------------------------------------------------------------------------------------------------------------------------------------------------------------------------------------------------------------------------------------------------------------------------------------------------------|-------------------------------------------------------------------------------------|--------------------------------------------------------------------------------------|-------------|-------------|------------|-------------|---|------------|-------------|-------------|---|------------|------------|------------|---|------------|------------|-------------|---|------------|------------|-------------|---|------------|------------|-------------|---|------------|------------|-------------|---|-------------|-------------|-------------|---|-------------|-------------|-------------|---|-------------|-------------|-------------|---|-------------|-------------|------------|---|-------------|-------------|-------------|---|-------------|-------------|-------------|---|-------------|-------------|------------|---|-------------|-------------|------------|---|-------------|-------------|-------------|---|-------------|-------------|-------------|---|-------------|-------------|-------------|---|-------------|-------------|-------------|---|------------|------------|-------------|---|------------|-------------|-------------|
| 16                                                                                                                                                                                                                                                                                                                                                                                                                                                                                                                                                                                                                                                                                                                                                                                                                                                                                                                                                                                                                                                                                                                                                                                                                                                                                                                                                                                                                                                                                                                                                                                                                                                                                                                                                                                        | 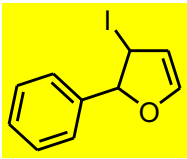   |    |             |             |            |             |   |            |             |             |   |            |            |            |   |            |            |             |   |            |            |             |   |            |            |             |   |            |            |             |   |             |             |             |   |             |             |             |   |             |             |             |   |             |             |            |   |             |             |             |   |             |             |             |   |             |             |            |   |             |             |            |   |             |             |             |   |             |             |             |   |             |             |             |   |             |             |             |   |            |            |             |   |            |             |             |
| <p>Cartesian Coordinates</p> <table border="1"> <tbody> <tr><td>C</td><td>1.78018678</td><td>0.00261462</td><td>0.95982920</td></tr> <tr><td>C</td><td>0.83740878</td><td>-0.12305038</td><td>-0.26045280</td></tr> <tr><td>O</td><td>1.79110578</td><td>1.41664162</td><td>1.27790520</td></tr> <tr><td>C</td><td>0.68266878</td><td>1.27231462</td><td>-0.69912180</td></tr> <tr><td>C</td><td>1.22023478</td><td>2.06396262</td><td>0.23247820</td></tr> <tr><td>H</td><td>0.17072178</td><td>1.59163662</td><td>-1.59050080</td></tr> <tr><td>H</td><td>1.26360178</td><td>3.14172162</td><td>0.28233420</td></tr> <tr><td>I</td><td>-1.16010422</td><td>-1.04660438</td><td>0.28681720</td></tr> <tr><td>H</td><td>1.17730878</td><td>-0.83757938</td><td>-0.99964080</td></tr> <tr><td>H</td><td>1.39942378</td><td>-0.51200538</td><td>1.83875120</td></tr> <tr><td>C</td><td>3.17018978</td><td>-0.50200338</td><td>0.63013720</td></tr> <tr><td>C</td><td>3.38060878</td><td>-1.88134538</td><td>0.59780020</td></tr> <tr><td>C</td><td>4.22223478</td><td>0.35535962</td><td>0.32603720</td></tr> <tr><td>C</td><td>4.62503178</td><td>-2.39564438</td><td>0.25973420</td></tr> <tr><td>H</td><td>2.56599678</td><td>-2.55466438</td><td>0.83979420</td></tr> <tr><td>C</td><td>5.46939778</td><td>-0.16095738</td><td>-0.01184780</td></tr> <tr><td>H</td><td>4.06878978</td><td>1.42456562</td><td>0.36421520</td></tr> <tr><td>C</td><td>5.67410378</td><td>-1.53476738</td><td>-0.04824380</td></tr> <tr><td>H</td><td>4.77743778</td><td>-3.46737638</td><td>0.24172420</td></tr> <tr><td>H</td><td>6.28265578</td><td>0.51461262</td><td>-0.24555080</td></tr> <tr><td>H</td><td>6.64583678</td><td>-1.93383338</td><td>-0.30976980</td></tr> </tbody> </table>           |                                                                                     |                                                                                      | C           | 1.78018678  | 0.00261462 | 0.95982920  | C | 0.83740878 | -0.12305038 | -0.26045280 | O | 1.79110578 | 1.41664162 | 1.27790520 | C | 0.68266878 | 1.27231462 | -0.69912180 | C | 1.22023478 | 2.06396262 | 0.23247820  | H | 0.17072178 | 1.59163662 | -1.59050080 | H | 1.26360178 | 3.14172162 | 0.28233420  | I | -1.16010422 | -1.04660438 | 0.28681720  | H | 1.17730878  | -0.83757938 | -0.99964080 | H | 1.39942378  | -0.51200538 | 1.83875120  | C | 3.17018978  | -0.50200338 | 0.63013720 | C | 3.38060878  | -1.88134538 | 0.59780020  | C | 4.22223478  | 0.35535962  | 0.32603720  | C | 4.62503178  | -2.39564438 | 0.25973420 | H | 2.56599678  | -2.55466438 | 0.83979420 | C | 5.46939778  | -0.16095738 | -0.01184780 | H | 4.06878978  | 1.42456562  | 0.36421520  | C | 5.67410378  | -1.53476738 | -0.04824380 | H | 4.77743778  | -3.46737638 | 0.24172420  | H | 6.28265578 | 0.51461262 | -0.24555080 | H | 6.64583678 | -1.93383338 | -0.30976980 |
| C                                                                                                                                                                                                                                                                                                                                                                                                                                                                                                                                                                                                                                                                                                                                                                                                                                                                                                                                                                                                                                                                                                                                                                                                                                                                                                                                                                                                                                                                                                                                                                                                                                                                                                                                                                                         | 1.78018678                                                                          | 0.00261462                                                                           | 0.95982920  |             |            |             |   |            |             |             |   |            |            |            |   |            |            |             |   |            |            |             |   |            |            |             |   |            |            |             |   |             |             |             |   |             |             |             |   |             |             |             |   |             |             |            |   |             |             |             |   |             |             |             |   |             |             |            |   |             |             |            |   |             |             |             |   |             |             |             |   |             |             |             |   |             |             |             |   |            |            |             |   |            |             |             |
| C                                                                                                                                                                                                                                                                                                                                                                                                                                                                                                                                                                                                                                                                                                                                                                                                                                                                                                                                                                                                                                                                                                                                                                                                                                                                                                                                                                                                                                                                                                                                                                                                                                                                                                                                                                                         | 0.83740878                                                                          | -0.12305038                                                                          | -0.26045280 |             |            |             |   |            |             |             |   |            |            |            |   |            |            |             |   |            |            |             |   |            |            |             |   |            |            |             |   |             |             |             |   |             |             |             |   |             |             |             |   |             |             |            |   |             |             |             |   |             |             |             |   |             |             |            |   |             |             |            |   |             |             |             |   |             |             |             |   |             |             |             |   |             |             |             |   |            |            |             |   |            |             |             |
| O                                                                                                                                                                                                                                                                                                                                                                                                                                                                                                                                                                                                                                                                                                                                                                                                                                                                                                                                                                                                                                                                                                                                                                                                                                                                                                                                                                                                                                                                                                                                                                                                                                                                                                                                                                                         | 1.79110578                                                                          | 1.41664162                                                                           | 1.27790520  |             |            |             |   |            |             |             |   |            |            |            |   |            |            |             |   |            |            |             |   |            |            |             |   |            |            |             |   |             |             |             |   |             |             |             |   |             |             |             |   |             |             |            |   |             |             |             |   |             |             |             |   |             |             |            |   |             |             |            |   |             |             |             |   |             |             |             |   |             |             |             |   |             |             |             |   |            |            |             |   |            |             |             |
| C                                                                                                                                                                                                                                                                                                                                                                                                                                                                                                                                                                                                                                                                                                                                                                                                                                                                                                                                                                                                                                                                                                                                                                                                                                                                                                                                                                                                                                                                                                                                                                                                                                                                                                                                                                                         | 0.68266878                                                                          | 1.27231462                                                                           | -0.69912180 |             |            |             |   |            |             |             |   |            |            |            |   |            |            |             |   |            |            |             |   |            |            |             |   |            |            |             |   |             |             |             |   |             |             |             |   |             |             |             |   |             |             |            |   |             |             |             |   |             |             |             |   |             |             |            |   |             |             |            |   |             |             |             |   |             |             |             |   |             |             |             |   |             |             |             |   |            |            |             |   |            |             |             |
| C                                                                                                                                                                                                                                                                                                                                                                                                                                                                                                                                                                                                                                                                                                                                                                                                                                                                                                                                                                                                                                                                                                                                                                                                                                                                                                                                                                                                                                                                                                                                                                                                                                                                                                                                                                                         | 1.22023478                                                                          | 2.06396262                                                                           | 0.23247820  |             |            |             |   |            |             |             |   |            |            |            |   |            |            |             |   |            |            |             |   |            |            |             |   |            |            |             |   |             |             |             |   |             |             |             |   |             |             |             |   |             |             |            |   |             |             |             |   |             |             |             |   |             |             |            |   |             |             |            |   |             |             |             |   |             |             |             |   |             |             |             |   |             |             |             |   |            |            |             |   |            |             |             |
| H                                                                                                                                                                                                                                                                                                                                                                                                                                                                                                                                                                                                                                                                                                                                                                                                                                                                                                                                                                                                                                                                                                                                                                                                                                                                                                                                                                                                                                                                                                                                                                                                                                                                                                                                                                                         | 0.17072178                                                                          | 1.59163662                                                                           | -1.59050080 |             |            |             |   |            |             |             |   |            |            |            |   |            |            |             |   |            |            |             |   |            |            |             |   |            |            |             |   |             |             |             |   |             |             |             |   |             |             |             |   |             |             |            |   |             |             |             |   |             |             |             |   |             |             |            |   |             |             |            |   |             |             |             |   |             |             |             |   |             |             |             |   |             |             |             |   |            |            |             |   |            |             |             |
| H                                                                                                                                                                                                                                                                                                                                                                                                                                                                                                                                                                                                                                                                                                                                                                                                                                                                                                                                                                                                                                                                                                                                                                                                                                                                                                                                                                                                                                                                                                                                                                                                                                                                                                                                                                                         | 1.26360178                                                                          | 3.14172162                                                                           | 0.28233420  |             |            |             |   |            |             |             |   |            |            |            |   |            |            |             |   |            |            |             |   |            |            |             |   |            |            |             |   |             |             |             |   |             |             |             |   |             |             |             |   |             |             |            |   |             |             |             |   |             |             |             |   |             |             |            |   |             |             |            |   |             |             |             |   |             |             |             |   |             |             |             |   |             |             |             |   |            |            |             |   |            |             |             |
| I                                                                                                                                                                                                                                                                                                                                                                                                                                                                                                                                                                                                                                                                                                                                                                                                                                                                                                                                                                                                                                                                                                                                                                                                                                                                                                                                                                                                                                                                                                                                                                                                                                                                                                                                                                                         | -1.16010422                                                                         | -1.04660438                                                                          | 0.28681720  |             |            |             |   |            |             |             |   |            |            |            |   |            |            |             |   |            |            |             |   |            |            |             |   |            |            |             |   |             |             |             |   |             |             |             |   |             |             |             |   |             |             |            |   |             |             |             |   |             |             |             |   |             |             |            |   |             |             |            |   |             |             |             |   |             |             |             |   |             |             |             |   |             |             |             |   |            |            |             |   |            |             |             |
| H                                                                                                                                                                                                                                                                                                                                                                                                                                                                                                                                                                                                                                                                                                                                                                                                                                                                                                                                                                                                                                                                                                                                                                                                                                                                                                                                                                                                                                                                                                                                                                                                                                                                                                                                                                                         | 1.17730878                                                                          | -0.83757938                                                                          | -0.99964080 |             |            |             |   |            |             |             |   |            |            |            |   |            |            |             |   |            |            |             |   |            |            |             |   |            |            |             |   |             |             |             |   |             |             |             |   |             |             |             |   |             |             |            |   |             |             |             |   |             |             |             |   |             |             |            |   |             |             |            |   |             |             |             |   |             |             |             |   |             |             |             |   |             |             |             |   |            |            |             |   |            |             |             |
| H                                                                                                                                                                                                                                                                                                                                                                                                                                                                                                                                                                                                                                                                                                                                                                                                                                                                                                                                                                                                                                                                                                                                                                                                                                                                                                                                                                                                                                                                                                                                                                                                                                                                                                                                                                                         | 1.39942378                                                                          | -0.51200538                                                                          | 1.83875120  |             |            |             |   |            |             |             |   |            |            |            |   |            |            |             |   |            |            |             |   |            |            |             |   |            |            |             |   |             |             |             |   |             |             |             |   |             |             |             |   |             |             |            |   |             |             |             |   |             |             |             |   |             |             |            |   |             |             |            |   |             |             |             |   |             |             |             |   |             |             |             |   |             |             |             |   |            |            |             |   |            |             |             |
| C                                                                                                                                                                                                                                                                                                                                                                                                                                                                                                                                                                                                                                                                                                                                                                                                                                                                                                                                                                                                                                                                                                                                                                                                                                                                                                                                                                                                                                                                                                                                                                                                                                                                                                                                                                                         | 3.17018978                                                                          | -0.50200338                                                                          | 0.63013720  |             |            |             |   |            |             |             |   |            |            |            |   |            |            |             |   |            |            |             |   |            |            |             |   |            |            |             |   |             |             |             |   |             |             |             |   |             |             |             |   |             |             |            |   |             |             |             |   |             |             |             |   |             |             |            |   |             |             |            |   |             |             |             |   |             |             |             |   |             |             |             |   |             |             |             |   |            |            |             |   |            |             |             |
| C                                                                                                                                                                                                                                                                                                                                                                                                                                                                                                                                                                                                                                                                                                                                                                                                                                                                                                                                                                                                                                                                                                                                                                                                                                                                                                                                                                                                                                                                                                                                                                                                                                                                                                                                                                                         | 3.38060878                                                                          | -1.88134538                                                                          | 0.59780020  |             |            |             |   |            |             |             |   |            |            |            |   |            |            |             |   |            |            |             |   |            |            |             |   |            |            |             |   |             |             |             |   |             |             |             |   |             |             |             |   |             |             |            |   |             |             |             |   |             |             |             |   |             |             |            |   |             |             |            |   |             |             |             |   |             |             |             |   |             |             |             |   |             |             |             |   |            |            |             |   |            |             |             |
| C                                                                                                                                                                                                                                                                                                                                                                                                                                                                                                                                                                                                                                                                                                                                                                                                                                                                                                                                                                                                                                                                                                                                                                                                                                                                                                                                                                                                                                                                                                                                                                                                                                                                                                                                                                                         | 4.22223478                                                                          | 0.35535962                                                                           | 0.32603720  |             |            |             |   |            |             |             |   |            |            |            |   |            |            |             |   |            |            |             |   |            |            |             |   |            |            |             |   |             |             |             |   |             |             |             |   |             |             |             |   |             |             |            |   |             |             |             |   |             |             |             |   |             |             |            |   |             |             |            |   |             |             |             |   |             |             |             |   |             |             |             |   |             |             |             |   |            |            |             |   |            |             |             |
| C                                                                                                                                                                                                                                                                                                                                                                                                                                                                                                                                                                                                                                                                                                                                                                                                                                                                                                                                                                                                                                                                                                                                                                                                                                                                                                                                                                                                                                                                                                                                                                                                                                                                                                                                                                                         | 4.62503178                                                                          | -2.39564438                                                                          | 0.25973420  |             |            |             |   |            |             |             |   |            |            |            |   |            |            |             |   |            |            |             |   |            |            |             |   |            |            |             |   |             |             |             |   |             |             |             |   |             |             |             |   |             |             |            |   |             |             |             |   |             |             |             |   |             |             |            |   |             |             |            |   |             |             |             |   |             |             |             |   |             |             |             |   |             |             |             |   |            |            |             |   |            |             |             |
| H                                                                                                                                                                                                                                                                                                                                                                                                                                                                                                                                                                                                                                                                                                                                                                                                                                                                                                                                                                                                                                                                                                                                                                                                                                                                                                                                                                                                                                                                                                                                                                                                                                                                                                                                                                                         | 2.56599678                                                                          | -2.55466438                                                                          | 0.83979420  |             |            |             |   |            |             |             |   |            |            |            |   |            |            |             |   |            |            |             |   |            |            |             |   |            |            |             |   |             |             |             |   |             |             |             |   |             |             |             |   |             |             |            |   |             |             |             |   |             |             |             |   |             |             |            |   |             |             |            |   |             |             |             |   |             |             |             |   |             |             |             |   |             |             |             |   |            |            |             |   |            |             |             |
| C                                                                                                                                                                                                                                                                                                                                                                                                                                                                                                                                                                                                                                                                                                                                                                                                                                                                                                                                                                                                                                                                                                                                                                                                                                                                                                                                                                                                                                                                                                                                                                                                                                                                                                                                                                                         | 5.46939778                                                                          | -0.16095738                                                                          | -0.01184780 |             |            |             |   |            |             |             |   |            |            |            |   |            |            |             |   |            |            |             |   |            |            |             |   |            |            |             |   |             |             |             |   |             |             |             |   |             |             |             |   |             |             |            |   |             |             |             |   |             |             |             |   |             |             |            |   |             |             |            |   |             |             |             |   |             |             |             |   |             |             |             |   |             |             |             |   |            |            |             |   |            |             |             |
| H                                                                                                                                                                                                                                                                                                                                                                                                                                                                                                                                                                                                                                                                                                                                                                                                                                                                                                                                                                                                                                                                                                                                                                                                                                                                                                                                                                                                                                                                                                                                                                                                                                                                                                                                                                                         | 4.06878978                                                                          | 1.42456562                                                                           | 0.36421520  |             |            |             |   |            |             |             |   |            |            |            |   |            |            |             |   |            |            |             |   |            |            |             |   |            |            |             |   |             |             |             |   |             |             |             |   |             |             |             |   |             |             |            |   |             |             |             |   |             |             |             |   |             |             |            |   |             |             |            |   |             |             |             |   |             |             |             |   |             |             |             |   |             |             |             |   |            |            |             |   |            |             |             |
| C                                                                                                                                                                                                                                                                                                                                                                                                                                                                                                                                                                                                                                                                                                                                                                                                                                                                                                                                                                                                                                                                                                                                                                                                                                                                                                                                                                                                                                                                                                                                                                                                                                                                                                                                                                                         | 5.67410378                                                                          | -1.53476738                                                                          | -0.04824380 |             |            |             |   |            |             |             |   |            |            |            |   |            |            |             |   |            |            |             |   |            |            |             |   |            |            |             |   |             |             |             |   |             |             |             |   |             |             |             |   |             |             |            |   |             |             |             |   |             |             |             |   |             |             |            |   |             |             |            |   |             |             |             |   |             |             |             |   |             |             |             |   |             |             |             |   |            |            |             |   |            |             |             |
| H                                                                                                                                                                                                                                                                                                                                                                                                                                                                                                                                                                                                                                                                                                                                                                                                                                                                                                                                                                                                                                                                                                                                                                                                                                                                                                                                                                                                                                                                                                                                                                                                                                                                                                                                                                                         | 4.77743778                                                                          | -3.46737638                                                                          | 0.24172420  |             |            |             |   |            |             |             |   |            |            |            |   |            |            |             |   |            |            |             |   |            |            |             |   |            |            |             |   |             |             |             |   |             |             |             |   |             |             |             |   |             |             |            |   |             |             |             |   |             |             |             |   |             |             |            |   |             |             |            |   |             |             |             |   |             |             |             |   |             |             |             |   |             |             |             |   |            |            |             |   |            |             |             |
| H                                                                                                                                                                                                                                                                                                                                                                                                                                                                                                                                                                                                                                                                                                                                                                                                                                                                                                                                                                                                                                                                                                                                                                                                                                                                                                                                                                                                                                                                                                                                                                                                                                                                                                                                                                                         | 6.28265578                                                                          | 0.51461262                                                                           | -0.24555080 |             |            |             |   |            |             |             |   |            |            |            |   |            |            |             |   |            |            |             |   |            |            |             |   |            |            |             |   |             |             |             |   |             |             |             |   |             |             |             |   |             |             |            |   |             |             |             |   |             |             |             |   |             |             |            |   |             |             |            |   |             |             |             |   |             |             |             |   |             |             |             |   |             |             |             |   |            |            |             |   |            |             |             |
| H                                                                                                                                                                                                                                                                                                                                                                                                                                                                                                                                                                                                                                                                                                                                                                                                                                                                                                                                                                                                                                                                                                                                                                                                                                                                                                                                                                                                                                                                                                                                                                                                                                                                                                                                                                                         | 6.64583678                                                                          | -1.93383338                                                                          | -0.30976980 |             |            |             |   |            |             |             |   |            |            |            |   |            |            |             |   |            |            |             |   |            |            |             |   |            |            |             |   |             |             |             |   |             |             |             |   |             |             |             |   |             |             |            |   |             |             |             |   |             |             |             |   |             |             |            |   |             |             |            |   |             |             |             |   |             |             |             |   |             |             |             |   |             |             |             |   |            |            |             |   |            |             |             |
| 17                                                                                                                                                                                                                                                                                                                                                                                                                                                                                                                                                                                                                                                                                                                                                                                                                                                                                                                                                                                                                                                                                                                                                                                                                                                                                                                                                                                                                                                                                                                                                                                                                                                                                                                                                                                        |  |  |             |             |            |             |   |            |             |             |   |            |            |            |   |            |            |             |   |            |            |             |   |            |            |             |   |            |            |             |   |             |             |             |   |             |             |             |   |             |             |             |   |             |             |            |   |             |             |             |   |             |             |             |   |             |             |            |   |             |             |            |   |             |             |             |   |             |             |             |   |             |             |             |   |             |             |             |   |            |            |             |   |            |             |             |
| <p>Cartesian Coordinates</p> <table border="1"> <tbody> <tr><td>C</td><td>-0.03213101</td><td>1.36380457</td><td>-1.29332059</td></tr> <tr><td>C</td><td>0.89366599</td><td>1.32195157</td><td>-0.06656559</td></tr> <tr><td>C</td><td>1.10660199</td><td>2.67736057</td><td>0.44247241</td></tr> <tr><td>H</td><td>0.59483099</td><td>0.57509357</td><td>0.65914441</td></tr> <tr><td>C</td><td>0.76409999</td><td>3.64843857</td><td>-0.41638059</td></tr> <tr><td>H</td><td>1.55383099</td><td>2.86075557</td><td>1.40839841</td></tr> <tr><td>H</td><td>0.88489099</td><td>4.70947657</td><td>-0.25004759</td></tr> <tr><td>H</td><td>0.32196599</td><td>0.71842757</td><td>-2.09045659</td></tr> <tr><td>C</td><td>-1.45109401</td><td>0.96817957</td><td>-0.94193259</td></tr> <tr><td>C</td><td>-2.02804801</td><td>-0.12736843</td><td>-1.58248359</td></tr> <tr><td>C</td><td>-2.19017101</td><td>1.65164157</td><td>0.02748041</td></tr> <tr><td>C</td><td>-3.32034401</td><td>-0.53605543</td><td>-1.26323559</td></tr> <tr><td>H</td><td>-1.46536001</td><td>-0.66503343</td><td>-2.33611259</td></tr> <tr><td>C</td><td>-3.47722801</td><td>1.24301157</td><td>0.34853941</td></tr> <tr><td>H</td><td>-1.75732001</td><td>2.50768057</td><td>0.52882741</td></tr> <tr><td>C</td><td>-4.04737501</td><td>0.14681557</td><td>-0.29590959</td></tr> <tr><td>H</td><td>-3.75511401</td><td>-1.38689343</td><td>-1.77230959</td></tr> <tr><td>H</td><td>-4.03842801</td><td>1.78078457</td><td>1.10222741</td></tr> <tr><td>H</td><td>-5.05185201</td><td>-0.16938343</td><td>-0.04507459</td></tr> <tr><td>S</td><td>0.08447799</td><td>3.10692157</td><td>-1.92653259</td></tr> <tr><td>I</td><td>2.94788499</td><td>0.43811757</td><td>-0.64890059</td></tr> </tbody> </table> |                                                                                     |                                                                                      | C           | -0.03213101 | 1.36380457 | -1.29332059 | C | 0.89366599 | 1.32195157  | -0.06656559 | C | 1.10660199 | 2.67736057 | 0.44247241 | H | 0.59483099 | 0.57509357 | 0.65914441  | C | 0.76409999 | 3.64843857 | -0.41638059 | H | 1.55383099 | 2.86075557 | 1.40839841  | H | 0.88489099 | 4.70947657 | -0.25004759 | H | 0.32196599  | 0.71842757  | -2.09045659 | C | -1.45109401 | 0.96817957  | -0.94193259 | C | -2.02804801 | -0.12736843 | -1.58248359 | C | -2.19017101 | 1.65164157  | 0.02748041 | C | -3.32034401 | -0.53605543 | -1.26323559 | H | -1.46536001 | -0.66503343 | -2.33611259 | C | -3.47722801 | 1.24301157  | 0.34853941 | H | -1.75732001 | 2.50768057  | 0.52882741 | C | -4.04737501 | 0.14681557  | -0.29590959 | H | -3.75511401 | -1.38689343 | -1.77230959 | H | -4.03842801 | 1.78078457  | 1.10222741  | H | -5.05185201 | -0.16938343 | -0.04507459 | S | 0.08447799 | 3.10692157 | -1.92653259 | I | 2.94788499 | 0.43811757  | -0.64890059 |
| C                                                                                                                                                                                                                                                                                                                                                                                                                                                                                                                                                                                                                                                                                                                                                                                                                                                                                                                                                                                                                                                                                                                                                                                                                                                                                                                                                                                                                                                                                                                                                                                                                                                                                                                                                                                         | -0.03213101                                                                         | 1.36380457                                                                           | -1.29332059 |             |            |             |   |            |             |             |   |            |            |            |   |            |            |             |   |            |            |             |   |            |            |             |   |            |            |             |   |             |             |             |   |             |             |             |   |             |             |             |   |             |             |            |   |             |             |             |   |             |             |             |   |             |             |            |   |             |             |            |   |             |             |             |   |             |             |             |   |             |             |             |   |             |             |             |   |            |            |             |   |            |             |             |
| C                                                                                                                                                                                                                                                                                                                                                                                                                                                                                                                                                                                                                                                                                                                                                                                                                                                                                                                                                                                                                                                                                                                                                                                                                                                                                                                                                                                                                                                                                                                                                                                                                                                                                                                                                                                         | 0.89366599                                                                          | 1.32195157                                                                           | -0.06656559 |             |            |             |   |            |             |             |   |            |            |            |   |            |            |             |   |            |            |             |   |            |            |             |   |            |            |             |   |             |             |             |   |             |             |             |   |             |             |             |   |             |             |            |   |             |             |             |   |             |             |             |   |             |             |            |   |             |             |            |   |             |             |             |   |             |             |             |   |             |             |             |   |             |             |             |   |            |            |             |   |            |             |             |
| C                                                                                                                                                                                                                                                                                                                                                                                                                                                                                                                                                                                                                                                                                                                                                                                                                                                                                                                                                                                                                                                                                                                                                                                                                                                                                                                                                                                                                                                                                                                                                                                                                                                                                                                                                                                         | 1.10660199                                                                          | 2.67736057                                                                           | 0.44247241  |             |            |             |   |            |             |             |   |            |            |            |   |            |            |             |   |            |            |             |   |            |            |             |   |            |            |             |   |             |             |             |   |             |             |             |   |             |             |             |   |             |             |            |   |             |             |             |   |             |             |             |   |             |             |            |   |             |             |            |   |             |             |             |   |             |             |             |   |             |             |             |   |             |             |             |   |            |            |             |   |            |             |             |
| H                                                                                                                                                                                                                                                                                                                                                                                                                                                                                                                                                                                                                                                                                                                                                                                                                                                                                                                                                                                                                                                                                                                                                                                                                                                                                                                                                                                                                                                                                                                                                                                                                                                                                                                                                                                         | 0.59483099                                                                          | 0.57509357                                                                           | 0.65914441  |             |            |             |   |            |             |             |   |            |            |            |   |            |            |             |   |            |            |             |   |            |            |             |   |            |            |             |   |             |             |             |   |             |             |             |   |             |             |             |   |             |             |            |   |             |             |             |   |             |             |             |   |             |             |            |   |             |             |            |   |             |             |             |   |             |             |             |   |             |             |             |   |             |             |             |   |            |            |             |   |            |             |             |
| C                                                                                                                                                                                                                                                                                                                                                                                                                                                                                                                                                                                                                                                                                                                                                                                                                                                                                                                                                                                                                                                                                                                                                                                                                                                                                                                                                                                                                                                                                                                                                                                                                                                                                                                                                                                         | 0.76409999                                                                          | 3.64843857                                                                           | -0.41638059 |             |            |             |   |            |             |             |   |            |            |            |   |            |            |             |   |            |            |             |   |            |            |             |   |            |            |             |   |             |             |             |   |             |             |             |   |             |             |             |   |             |             |            |   |             |             |             |   |             |             |             |   |             |             |            |   |             |             |            |   |             |             |             |   |             |             |             |   |             |             |             |   |             |             |             |   |            |            |             |   |            |             |             |
| H                                                                                                                                                                                                                                                                                                                                                                                                                                                                                                                                                                                                                                                                                                                                                                                                                                                                                                                                                                                                                                                                                                                                                                                                                                                                                                                                                                                                                                                                                                                                                                                                                                                                                                                                                                                         | 1.55383099                                                                          | 2.86075557                                                                           | 1.40839841  |             |            |             |   |            |             |             |   |            |            |            |   |            |            |             |   |            |            |             |   |            |            |             |   |            |            |             |   |             |             |             |   |             |             |             |   |             |             |             |   |             |             |            |   |             |             |             |   |             |             |             |   |             |             |            |   |             |             |            |   |             |             |             |   |             |             |             |   |             |             |             |   |             |             |             |   |            |            |             |   |            |             |             |
| H                                                                                                                                                                                                                                                                                                                                                                                                                                                                                                                                                                                                                                                                                                                                                                                                                                                                                                                                                                                                                                                                                                                                                                                                                                                                                                                                                                                                                                                                                                                                                                                                                                                                                                                                                                                         | 0.88489099                                                                          | 4.70947657                                                                           | -0.25004759 |             |            |             |   |            |             |             |   |            |            |            |   |            |            |             |   |            |            |             |   |            |            |             |   |            |            |             |   |             |             |             |   |             |             |             |   |             |             |             |   |             |             |            |   |             |             |             |   |             |             |             |   |             |             |            |   |             |             |            |   |             |             |             |   |             |             |             |   |             |             |             |   |             |             |             |   |            |            |             |   |            |             |             |
| H                                                                                                                                                                                                                                                                                                                                                                                                                                                                                                                                                                                                                                                                                                                                                                                                                                                                                                                                                                                                                                                                                                                                                                                                                                                                                                                                                                                                                                                                                                                                                                                                                                                                                                                                                                                         | 0.32196599                                                                          | 0.71842757                                                                           | -2.09045659 |             |            |             |   |            |             |             |   |            |            |            |   |            |            |             |   |            |            |             |   |            |            |             |   |            |            |             |   |             |             |             |   |             |             |             |   |             |             |             |   |             |             |            |   |             |             |             |   |             |             |             |   |             |             |            |   |             |             |            |   |             |             |             |   |             |             |             |   |             |             |             |   |             |             |             |   |            |            |             |   |            |             |             |
| C                                                                                                                                                                                                                                                                                                                                                                                                                                                                                                                                                                                                                                                                                                                                                                                                                                                                                                                                                                                                                                                                                                                                                                                                                                                                                                                                                                                                                                                                                                                                                                                                                                                                                                                                                                                         | -1.45109401                                                                         | 0.96817957                                                                           | -0.94193259 |             |            |             |   |            |             |             |   |            |            |            |   |            |            |             |   |            |            |             |   |            |            |             |   |            |            |             |   |             |             |             |   |             |             |             |   |             |             |             |   |             |             |            |   |             |             |             |   |             |             |             |   |             |             |            |   |             |             |            |   |             |             |             |   |             |             |             |   |             |             |             |   |             |             |             |   |            |            |             |   |            |             |             |
| C                                                                                                                                                                                                                                                                                                                                                                                                                                                                                                                                                                                                                                                                                                                                                                                                                                                                                                                                                                                                                                                                                                                                                                                                                                                                                                                                                                                                                                                                                                                                                                                                                                                                                                                                                                                         | -2.02804801                                                                         | -0.12736843                                                                          | -1.58248359 |             |            |             |   |            |             |             |   |            |            |            |   |            |            |             |   |            |            |             |   |            |            |             |   |            |            |             |   |             |             |             |   |             |             |             |   |             |             |             |   |             |             |            |   |             |             |             |   |             |             |             |   |             |             |            |   |             |             |            |   |             |             |             |   |             |             |             |   |             |             |             |   |             |             |             |   |            |            |             |   |            |             |             |
| C                                                                                                                                                                                                                                                                                                                                                                                                                                                                                                                                                                                                                                                                                                                                                                                                                                                                                                                                                                                                                                                                                                                                                                                                                                                                                                                                                                                                                                                                                                                                                                                                                                                                                                                                                                                         | -2.19017101                                                                         | 1.65164157                                                                           | 0.02748041  |             |            |             |   |            |             |             |   |            |            |            |   |            |            |             |   |            |            |             |   |            |            |             |   |            |            |             |   |             |             |             |   |             |             |             |   |             |             |             |   |             |             |            |   |             |             |             |   |             |             |             |   |             |             |            |   |             |             |            |   |             |             |             |   |             |             |             |   |             |             |             |   |             |             |             |   |            |            |             |   |            |             |             |
| C                                                                                                                                                                                                                                                                                                                                                                                                                                                                                                                                                                                                                                                                                                                                                                                                                                                                                                                                                                                                                                                                                                                                                                                                                                                                                                                                                                                                                                                                                                                                                                                                                                                                                                                                                                                         | -3.32034401                                                                         | -0.53605543                                                                          | -1.26323559 |             |            |             |   |            |             |             |   |            |            |            |   |            |            |             |   |            |            |             |   |            |            |             |   |            |            |             |   |             |             |             |   |             |             |             |   |             |             |             |   |             |             |            |   |             |             |             |   |             |             |             |   |             |             |            |   |             |             |            |   |             |             |             |   |             |             |             |   |             |             |             |   |             |             |             |   |            |            |             |   |            |             |             |
| H                                                                                                                                                                                                                                                                                                                                                                                                                                                                                                                                                                                                                                                                                                                                                                                                                                                                                                                                                                                                                                                                                                                                                                                                                                                                                                                                                                                                                                                                                                                                                                                                                                                                                                                                                                                         | -1.46536001                                                                         | -0.66503343                                                                          | -2.33611259 |             |            |             |   |            |             |             |   |            |            |            |   |            |            |             |   |            |            |             |   |            |            |             |   |            |            |             |   |             |             |             |   |             |             |             |   |             |             |             |   |             |             |            |   |             |             |             |   |             |             |             |   |             |             |            |   |             |             |            |   |             |             |             |   |             |             |             |   |             |             |             |   |             |             |             |   |            |            |             |   |            |             |             |
| C                                                                                                                                                                                                                                                                                                                                                                                                                                                                                                                                                                                                                                                                                                                                                                                                                                                                                                                                                                                                                                                                                                                                                                                                                                                                                                                                                                                                                                                                                                                                                                                                                                                                                                                                                                                         | -3.47722801                                                                         | 1.24301157                                                                           | 0.34853941  |             |            |             |   |            |             |             |   |            |            |            |   |            |            |             |   |            |            |             |   |            |            |             |   |            |            |             |   |             |             |             |   |             |             |             |   |             |             |             |   |             |             |            |   |             |             |             |   |             |             |             |   |             |             |            |   |             |             |            |   |             |             |             |   |             |             |             |   |             |             |             |   |             |             |             |   |            |            |             |   |            |             |             |
| H                                                                                                                                                                                                                                                                                                                                                                                                                                                                                                                                                                                                                                                                                                                                                                                                                                                                                                                                                                                                                                                                                                                                                                                                                                                                                                                                                                                                                                                                                                                                                                                                                                                                                                                                                                                         | -1.75732001                                                                         | 2.50768057                                                                           | 0.52882741  |             |            |             |   |            |             |             |   |            |            |            |   |            |            |             |   |            |            |             |   |            |            |             |   |            |            |             |   |             |             |             |   |             |             |             |   |             |             |             |   |             |             |            |   |             |             |             |   |             |             |             |   |             |             |            |   |             |             |            |   |             |             |             |   |             |             |             |   |             |             |             |   |             |             |             |   |            |            |             |   |            |             |             |
| C                                                                                                                                                                                                                                                                                                                                                                                                                                                                                                                                                                                                                                                                                                                                                                                                                                                                                                                                                                                                                                                                                                                                                                                                                                                                                                                                                                                                                                                                                                                                                                                                                                                                                                                                                                                         | -4.04737501                                                                         | 0.14681557                                                                           | -0.29590959 |             |            |             |   |            |             |             |   |            |            |            |   |            |            |             |   |            |            |             |   |            |            |             |   |            |            |             |   |             |             |             |   |             |             |             |   |             |             |             |   |             |             |            |   |             |             |             |   |             |             |             |   |             |             |            |   |             |             |            |   |             |             |             |   |             |             |             |   |             |             |             |   |             |             |             |   |            |            |             |   |            |             |             |
| H                                                                                                                                                                                                                                                                                                                                                                                                                                                                                                                                                                                                                                                                                                                                                                                                                                                                                                                                                                                                                                                                                                                                                                                                                                                                                                                                                                                                                                                                                                                                                                                                                                                                                                                                                                                         | -3.75511401                                                                         | -1.38689343                                                                          | -1.77230959 |             |            |             |   |            |             |             |   |            |            |            |   |            |            |             |   |            |            |             |   |            |            |             |   |            |            |             |   |             |             |             |   |             |             |             |   |             |             |             |   |             |             |            |   |             |             |             |   |             |             |             |   |             |             |            |   |             |             |            |   |             |             |             |   |             |             |             |   |             |             |             |   |             |             |             |   |            |            |             |   |            |             |             |
| H                                                                                                                                                                                                                                                                                                                                                                                                                                                                                                                                                                                                                                                                                                                                                                                                                                                                                                                                                                                                                                                                                                                                                                                                                                                                                                                                                                                                                                                                                                                                                                                                                                                                                                                                                                                         | -4.03842801                                                                         | 1.78078457                                                                           | 1.10222741  |             |            |             |   |            |             |             |   |            |            |            |   |            |            |             |   |            |            |             |   |            |            |             |   |            |            |             |   |             |             |             |   |             |             |             |   |             |             |             |   |             |             |            |   |             |             |             |   |             |             |             |   |             |             |            |   |             |             |            |   |             |             |             |   |             |             |             |   |             |             |             |   |             |             |             |   |            |            |             |   |            |             |             |
| H                                                                                                                                                                                                                                                                                                                                                                                                                                                                                                                                                                                                                                                                                                                                                                                                                                                                                                                                                                                                                                                                                                                                                                                                                                                                                                                                                                                                                                                                                                                                                                                                                                                                                                                                                                                         | -5.05185201                                                                         | -0.16938343                                                                          | -0.04507459 |             |            |             |   |            |             |             |   |            |            |            |   |            |            |             |   |            |            |             |   |            |            |             |   |            |            |             |   |             |             |             |   |             |             |             |   |             |             |             |   |             |             |            |   |             |             |             |   |             |             |             |   |             |             |            |   |             |             |            |   |             |             |             |   |             |             |             |   |             |             |             |   |             |             |             |   |            |            |             |   |            |             |             |
| S                                                                                                                                                                                                                                                                                                                                                                                                                                                                                                                                                                                                                                                                                                                                                                                                                                                                                                                                                                                                                                                                                                                                                                                                                                                                                                                                                                                                                                                                                                                                                                                                                                                                                                                                                                                         | 0.08447799                                                                          | 3.10692157                                                                           | -1.92653259 |             |            |             |   |            |             |             |   |            |            |            |   |            |            |             |   |            |            |             |   |            |            |             |   |            |            |             |   |             |             |             |   |             |             |             |   |             |             |             |   |             |             |            |   |             |             |             |   |             |             |             |   |             |             |            |   |             |             |            |   |             |             |             |   |             |             |             |   |             |             |             |   |             |             |             |   |            |            |             |   |            |             |             |
| I                                                                                                                                                                                                                                                                                                                                                                                                                                                                                                                                                                                                                                                                                                                                                                                                                                                                                                                                                                                                                                                                                                                                                                                                                                                                                                                                                                                                                                                                                                                                                                                                                                                                                                                                                                                         | 2.94788499                                                                          | 0.43811757                                                                           | -0.64890059 |             |            |             |   |            |             |             |   |            |            |            |   |            |            |             |   |            |            |             |   |            |            |             |   |            |            |             |   |             |             |             |   |             |             |             |   |             |             |             |   |             |             |            |   |             |             |             |   |             |             |             |   |             |             |            |   |             |             |            |   |             |             |             |   |             |             |             |   |             |             |             |   |             |             |             |   |            |            |             |   |            |             |             |

|                                                                                                                                                                                                                                                                                                                                                                                                                                                                                                                                                                                                                                                                                                                                                                                                                                                                                                                                                                                                                                                                                                                                                                                                                                                                                                                                                                                                                                                                                                                                                                                                                                                                                                                                                                                                                                                                                                                                                                                                                                                                                                                                                                                                                                                                                                                                                                                                                                                                                                                                                                                                                                                                                                                                                                                                                                                                                                                                                                                                                                                                                                                                                                                                                                                                                                                               |                                                                                     |                                                                                      |             |             |             |            |   |            |             |            |   |            |             |            |   |            |             |            |   |            |             |            |   |            |             |            |   |            |             |             |   |            |             |             |   |            |            |             |   |            |             |             |   |            |            |             |   |             |            |            |   |             |            |             |   |            |            |            |   |            |            |            |   |            |             |            |   |            |            |            |   |             |            |            |   |            |             |            |   |            |             |            |   |            |             |            |   |            |             |            |   |            |             |             |   |            |             |            |   |            |             |             |   |             |            |            |   |             |            |            |   |             |            |            |   |             |            |            |   |             |            |             |   |             |            |            |   |             |            |            |   |            |            |             |   |            |            |             |   |            |            |             |   |            |            |             |   |            |            |             |   |            |            |             |   |            |            |            |   |             |             |             |
|-------------------------------------------------------------------------------------------------------------------------------------------------------------------------------------------------------------------------------------------------------------------------------------------------------------------------------------------------------------------------------------------------------------------------------------------------------------------------------------------------------------------------------------------------------------------------------------------------------------------------------------------------------------------------------------------------------------------------------------------------------------------------------------------------------------------------------------------------------------------------------------------------------------------------------------------------------------------------------------------------------------------------------------------------------------------------------------------------------------------------------------------------------------------------------------------------------------------------------------------------------------------------------------------------------------------------------------------------------------------------------------------------------------------------------------------------------------------------------------------------------------------------------------------------------------------------------------------------------------------------------------------------------------------------------------------------------------------------------------------------------------------------------------------------------------------------------------------------------------------------------------------------------------------------------------------------------------------------------------------------------------------------------------------------------------------------------------------------------------------------------------------------------------------------------------------------------------------------------------------------------------------------------------------------------------------------------------------------------------------------------------------------------------------------------------------------------------------------------------------------------------------------------------------------------------------------------------------------------------------------------------------------------------------------------------------------------------------------------------------------------------------------------------------------------------------------------------------------------------------------------------------------------------------------------------------------------------------------------------------------------------------------------------------------------------------------------------------------------------------------------------------------------------------------------------------------------------------------------------------------------------------------------------------------------------------------------|-------------------------------------------------------------------------------------|--------------------------------------------------------------------------------------|-------------|-------------|-------------|------------|---|------------|-------------|------------|---|------------|-------------|------------|---|------------|-------------|------------|---|------------|-------------|------------|---|------------|-------------|------------|---|------------|-------------|-------------|---|------------|-------------|-------------|---|------------|------------|-------------|---|------------|-------------|-------------|---|------------|------------|-------------|---|-------------|------------|------------|---|-------------|------------|-------------|---|------------|------------|------------|---|------------|------------|------------|---|------------|-------------|------------|---|------------|------------|------------|---|-------------|------------|------------|---|------------|-------------|------------|---|------------|-------------|------------|---|------------|-------------|------------|---|------------|-------------|------------|---|------------|-------------|-------------|---|------------|-------------|------------|---|------------|-------------|-------------|---|-------------|------------|------------|---|-------------|------------|------------|---|-------------|------------|------------|---|-------------|------------|------------|---|-------------|------------|-------------|---|-------------|------------|------------|---|-------------|------------|------------|---|------------|------------|-------------|---|------------|------------|-------------|---|------------|------------|-------------|---|------------|------------|-------------|---|------------|------------|-------------|---|------------|------------|-------------|---|------------|------------|------------|---|-------------|-------------|-------------|
| 18                                                                                                                                                                                                                                                                                                                                                                                                                                                                                                                                                                                                                                                                                                                                                                                                                                                                                                                                                                                                                                                                                                                                                                                                                                                                                                                                                                                                                                                                                                                                                                                                                                                                                                                                                                                                                                                                                                                                                                                                                                                                                                                                                                                                                                                                                                                                                                                                                                                                                                                                                                                                                                                                                                                                                                                                                                                                                                                                                                                                                                                                                                                                                                                                                                                                                                                            | 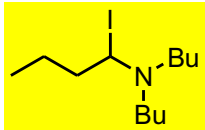   |    |             |             |             |            |   |            |             |            |   |            |             |            |   |            |             |            |   |            |             |            |   |            |             |            |   |            |             |             |   |            |             |             |   |            |            |             |   |            |             |             |   |            |            |             |   |             |            |            |   |             |            |             |   |            |            |            |   |            |            |            |   |            |             |            |   |            |            |            |   |             |            |            |   |            |             |            |   |            |             |            |   |            |             |            |   |            |             |            |   |            |             |             |   |            |             |            |   |            |             |             |   |             |            |            |   |             |            |            |   |             |            |            |   |             |            |            |   |             |            |             |   |             |            |            |   |             |            |            |   |            |            |             |   |            |            |             |   |            |            |             |   |            |            |             |   |            |            |             |   |            |            |             |   |            |            |            |   |             |             |             |
| <p>Cartesian Coordinates</p> <table border="1"> <tbody> <tr><td>C</td><td>-0.05461300</td><td>1.11188300</td><td>0.83346800</td></tr> <tr><td>N</td><td>0.95312000</td><td>0.37175500</td><td>0.53710000</td></tr> <tr><td>C</td><td>1.13223200</td><td>-0.93593000</td><td>1.21288800</td></tr> <tr><td>H</td><td>0.29241200</td><td>-1.05400600</td><td>1.89444800</td></tr> <tr><td>H</td><td>2.04223100</td><td>-0.87743700</td><td>1.80996700</td></tr> <tr><td>C</td><td>1.18941300</td><td>-2.11045800</td><td>0.24195500</td></tr> <tr><td>H</td><td>2.08653100</td><td>-2.04831700</td><td>-0.37841800</td></tr> <tr><td>H</td><td>0.32336100</td><td>-2.06597400</td><td>-0.42283700</td></tr> <tr><td>C</td><td>1.93465800</td><td>0.73329000</td><td>-0.50543100</td></tr> <tr><td>H</td><td>1.83846300</td><td>-0.00009500</td><td>-1.30640900</td></tr> <tr><td>H</td><td>1.65617600</td><td>1.69798200</td><td>-0.91606700</td></tr> <tr><td>C</td><td>-0.37123300</td><td>2.44246100</td><td>0.24836400</td></tr> <tr><td>H</td><td>-0.56575100</td><td>2.31412800</td><td>-0.82087800</td></tr> <tr><td>H</td><td>0.51153400</td><td>3.08580000</td><td>0.32439000</td></tr> <tr><td>C</td><td>3.36486100</td><td>0.78125300</td><td>0.02458500</td></tr> <tr><td>H</td><td>3.67152900</td><td>-0.20545200</td><td>0.37834800</td></tr> <tr><td>H</td><td>3.40688800</td><td>1.45785100</td><td>0.88274800</td></tr> <tr><td>H</td><td>-0.70386300</td><td>0.73478300</td><td>1.61271100</td></tr> <tr><td>C</td><td>1.19434400</td><td>-3.44140900</td><td>0.99499600</td></tr> <tr><td>H</td><td>0.29016100</td><td>-3.51225400</td><td>1.60716200</td></tr> <tr><td>H</td><td>2.04149600</td><td>-3.46505600</td><td>1.68764300</td></tr> <tr><td>C</td><td>1.26829400</td><td>-4.63817100</td><td>0.04939900</td></tr> <tr><td>H</td><td>2.18039600</td><td>-4.60758500</td><td>-0.55157700</td></tr> <tr><td>H</td><td>1.26274800</td><td>-5.57880800</td><td>0.60285100</td></tr> <tr><td>H</td><td>0.41761900</td><td>-4.64664800</td><td>-0.63610600</td></tr> <tr><td>C</td><td>-1.57054800</td><td>3.10491100</td><td>0.92801100</td></tr> <tr><td>H</td><td>-1.35716700</td><td>3.22553100</td><td>1.99371300</td></tr> <tr><td>H</td><td>-2.43027300</td><td>2.43549300</td><td>0.84784300</td></tr> <tr><td>C</td><td>-1.89928200</td><td>4.45905100</td><td>0.30788100</td></tr> <tr><td>H</td><td>-2.14319100</td><td>4.35514600</td><td>-0.75212800</td></tr> <tr><td>H</td><td>-2.75479000</td><td>4.91804600</td><td>0.80535400</td></tr> <tr><td>H</td><td>-1.05403500</td><td>5.14673600</td><td>0.39017600</td></tr> <tr><td>C</td><td>4.33816600</td><td>1.25024400</td><td>-1.05720000</td></tr> <tr><td>H</td><td>4.04092100</td><td>2.24376700</td><td>-1.40606600</td></tr> <tr><td>H</td><td>4.26509100</td><td>0.58286400</td><td>-1.92145100</td></tr> <tr><td>C</td><td>5.78082200</td><td>1.28939400</td><td>-0.55835900</td></tr> <tr><td>H</td><td>6.10984400</td><td>0.29917700</td><td>-0.23415400</td></tr> <tr><td>H</td><td>6.45952300</td><td>1.62811400</td><td>-1.34292900</td></tr> <tr><td>H</td><td>5.88313800</td><td>1.96938100</td><td>0.29082500</td></tr> <tr><td>I</td><td>-2.68463200</td><td>-0.65876500</td><td>-0.46268300</td></tr> </tbody> </table> |                                                                                     |                                                                                      | C           | -0.05461300 | 1.11188300  | 0.83346800 | N | 0.95312000 | 0.37175500  | 0.53710000 | C | 1.13223200 | -0.93593000 | 1.21288800 | H | 0.29241200 | -1.05400600 | 1.89444800 | H | 2.04223100 | -0.87743700 | 1.80996700 | C | 1.18941300 | -2.11045800 | 0.24195500 | H | 2.08653100 | -2.04831700 | -0.37841800 | H | 0.32336100 | -2.06597400 | -0.42283700 | C | 1.93465800 | 0.73329000 | -0.50543100 | H | 1.83846300 | -0.00009500 | -1.30640900 | H | 1.65617600 | 1.69798200 | -0.91606700 | C | -0.37123300 | 2.44246100 | 0.24836400 | H | -0.56575100 | 2.31412800 | -0.82087800 | H | 0.51153400 | 3.08580000 | 0.32439000 | C | 3.36486100 | 0.78125300 | 0.02458500 | H | 3.67152900 | -0.20545200 | 0.37834800 | H | 3.40688800 | 1.45785100 | 0.88274800 | H | -0.70386300 | 0.73478300 | 1.61271100 | C | 1.19434400 | -3.44140900 | 0.99499600 | H | 0.29016100 | -3.51225400 | 1.60716200 | H | 2.04149600 | -3.46505600 | 1.68764300 | C | 1.26829400 | -4.63817100 | 0.04939900 | H | 2.18039600 | -4.60758500 | -0.55157700 | H | 1.26274800 | -5.57880800 | 0.60285100 | H | 0.41761900 | -4.64664800 | -0.63610600 | C | -1.57054800 | 3.10491100 | 0.92801100 | H | -1.35716700 | 3.22553100 | 1.99371300 | H | -2.43027300 | 2.43549300 | 0.84784300 | C | -1.89928200 | 4.45905100 | 0.30788100 | H | -2.14319100 | 4.35514600 | -0.75212800 | H | -2.75479000 | 4.91804600 | 0.80535400 | H | -1.05403500 | 5.14673600 | 0.39017600 | C | 4.33816600 | 1.25024400 | -1.05720000 | H | 4.04092100 | 2.24376700 | -1.40606600 | H | 4.26509100 | 0.58286400 | -1.92145100 | C | 5.78082200 | 1.28939400 | -0.55835900 | H | 6.10984400 | 0.29917700 | -0.23415400 | H | 6.45952300 | 1.62811400 | -1.34292900 | H | 5.88313800 | 1.96938100 | 0.29082500 | I | -2.68463200 | -0.65876500 | -0.46268300 |
| C                                                                                                                                                                                                                                                                                                                                                                                                                                                                                                                                                                                                                                                                                                                                                                                                                                                                                                                                                                                                                                                                                                                                                                                                                                                                                                                                                                                                                                                                                                                                                                                                                                                                                                                                                                                                                                                                                                                                                                                                                                                                                                                                                                                                                                                                                                                                                                                                                                                                                                                                                                                                                                                                                                                                                                                                                                                                                                                                                                                                                                                                                                                                                                                                                                                                                                                             | -0.05461300                                                                         | 1.11188300                                                                           | 0.83346800  |             |             |            |   |            |             |            |   |            |             |            |   |            |             |            |   |            |             |            |   |            |             |            |   |            |             |             |   |            |             |             |   |            |            |             |   |            |             |             |   |            |            |             |   |             |            |            |   |             |            |             |   |            |            |            |   |            |            |            |   |            |             |            |   |            |            |            |   |             |            |            |   |            |             |            |   |            |             |            |   |            |             |            |   |            |             |            |   |            |             |             |   |            |             |            |   |            |             |             |   |             |            |            |   |             |            |            |   |             |            |            |   |             |            |            |   |             |            |             |   |             |            |            |   |             |            |            |   |            |            |             |   |            |            |             |   |            |            |             |   |            |            |             |   |            |            |             |   |            |            |             |   |            |            |            |   |             |             |             |
| N                                                                                                                                                                                                                                                                                                                                                                                                                                                                                                                                                                                                                                                                                                                                                                                                                                                                                                                                                                                                                                                                                                                                                                                                                                                                                                                                                                                                                                                                                                                                                                                                                                                                                                                                                                                                                                                                                                                                                                                                                                                                                                                                                                                                                                                                                                                                                                                                                                                                                                                                                                                                                                                                                                                                                                                                                                                                                                                                                                                                                                                                                                                                                                                                                                                                                                                             | 0.95312000                                                                          | 0.37175500                                                                           | 0.53710000  |             |             |            |   |            |             |            |   |            |             |            |   |            |             |            |   |            |             |            |   |            |             |            |   |            |             |             |   |            |             |             |   |            |            |             |   |            |             |             |   |            |            |             |   |             |            |            |   |             |            |             |   |            |            |            |   |            |            |            |   |            |             |            |   |            |            |            |   |             |            |            |   |            |             |            |   |            |             |            |   |            |             |            |   |            |             |            |   |            |             |             |   |            |             |            |   |            |             |             |   |             |            |            |   |             |            |            |   |             |            |            |   |             |            |            |   |             |            |             |   |             |            |            |   |             |            |            |   |            |            |             |   |            |            |             |   |            |            |             |   |            |            |             |   |            |            |             |   |            |            |             |   |            |            |            |   |             |             |             |
| C                                                                                                                                                                                                                                                                                                                                                                                                                                                                                                                                                                                                                                                                                                                                                                                                                                                                                                                                                                                                                                                                                                                                                                                                                                                                                                                                                                                                                                                                                                                                                                                                                                                                                                                                                                                                                                                                                                                                                                                                                                                                                                                                                                                                                                                                                                                                                                                                                                                                                                                                                                                                                                                                                                                                                                                                                                                                                                                                                                                                                                                                                                                                                                                                                                                                                                                             | 1.13223200                                                                          | -0.93593000                                                                          | 1.21288800  |             |             |            |   |            |             |            |   |            |             |            |   |            |             |            |   |            |             |            |   |            |             |            |   |            |             |             |   |            |             |             |   |            |            |             |   |            |             |             |   |            |            |             |   |             |            |            |   |             |            |             |   |            |            |            |   |            |            |            |   |            |             |            |   |            |            |            |   |             |            |            |   |            |             |            |   |            |             |            |   |            |             |            |   |            |             |            |   |            |             |             |   |            |             |            |   |            |             |             |   |             |            |            |   |             |            |            |   |             |            |            |   |             |            |            |   |             |            |             |   |             |            |            |   |             |            |            |   |            |            |             |   |            |            |             |   |            |            |             |   |            |            |             |   |            |            |             |   |            |            |             |   |            |            |            |   |             |             |             |
| H                                                                                                                                                                                                                                                                                                                                                                                                                                                                                                                                                                                                                                                                                                                                                                                                                                                                                                                                                                                                                                                                                                                                                                                                                                                                                                                                                                                                                                                                                                                                                                                                                                                                                                                                                                                                                                                                                                                                                                                                                                                                                                                                                                                                                                                                                                                                                                                                                                                                                                                                                                                                                                                                                                                                                                                                                                                                                                                                                                                                                                                                                                                                                                                                                                                                                                                             | 0.29241200                                                                          | -1.05400600                                                                          | 1.89444800  |             |             |            |   |            |             |            |   |            |             |            |   |            |             |            |   |            |             |            |   |            |             |            |   |            |             |             |   |            |             |             |   |            |            |             |   |            |             |             |   |            |            |             |   |             |            |            |   |             |            |             |   |            |            |            |   |            |            |            |   |            |             |            |   |            |            |            |   |             |            |            |   |            |             |            |   |            |             |            |   |            |             |            |   |            |             |            |   |            |             |             |   |            |             |            |   |            |             |             |   |             |            |            |   |             |            |            |   |             |            |            |   |             |            |            |   |             |            |             |   |             |            |            |   |             |            |            |   |            |            |             |   |            |            |             |   |            |            |             |   |            |            |             |   |            |            |             |   |            |            |             |   |            |            |            |   |             |             |             |
| H                                                                                                                                                                                                                                                                                                                                                                                                                                                                                                                                                                                                                                                                                                                                                                                                                                                                                                                                                                                                                                                                                                                                                                                                                                                                                                                                                                                                                                                                                                                                                                                                                                                                                                                                                                                                                                                                                                                                                                                                                                                                                                                                                                                                                                                                                                                                                                                                                                                                                                                                                                                                                                                                                                                                                                                                                                                                                                                                                                                                                                                                                                                                                                                                                                                                                                                             | 2.04223100                                                                          | -0.87743700                                                                          | 1.80996700  |             |             |            |   |            |             |            |   |            |             |            |   |            |             |            |   |            |             |            |   |            |             |            |   |            |             |             |   |            |             |             |   |            |            |             |   |            |             |             |   |            |            |             |   |             |            |            |   |             |            |             |   |            |            |            |   |            |            |            |   |            |             |            |   |            |            |            |   |             |            |            |   |            |             |            |   |            |             |            |   |            |             |            |   |            |             |            |   |            |             |             |   |            |             |            |   |            |             |             |   |             |            |            |   |             |            |            |   |             |            |            |   |             |            |            |   |             |            |             |   |             |            |            |   |             |            |            |   |            |            |             |   |            |            |             |   |            |            |             |   |            |            |             |   |            |            |             |   |            |            |             |   |            |            |            |   |             |             |             |
| C                                                                                                                                                                                                                                                                                                                                                                                                                                                                                                                                                                                                                                                                                                                                                                                                                                                                                                                                                                                                                                                                                                                                                                                                                                                                                                                                                                                                                                                                                                                                                                                                                                                                                                                                                                                                                                                                                                                                                                                                                                                                                                                                                                                                                                                                                                                                                                                                                                                                                                                                                                                                                                                                                                                                                                                                                                                                                                                                                                                                                                                                                                                                                                                                                                                                                                                             | 1.18941300                                                                          | -2.11045800                                                                          | 0.24195500  |             |             |            |   |            |             |            |   |            |             |            |   |            |             |            |   |            |             |            |   |            |             |            |   |            |             |             |   |            |             |             |   |            |            |             |   |            |             |             |   |            |            |             |   |             |            |            |   |             |            |             |   |            |            |            |   |            |            |            |   |            |             |            |   |            |            |            |   |             |            |            |   |            |             |            |   |            |             |            |   |            |             |            |   |            |             |            |   |            |             |             |   |            |             |            |   |            |             |             |   |             |            |            |   |             |            |            |   |             |            |            |   |             |            |            |   |             |            |             |   |             |            |            |   |             |            |            |   |            |            |             |   |            |            |             |   |            |            |             |   |            |            |             |   |            |            |             |   |            |            |             |   |            |            |            |   |             |             |             |
| H                                                                                                                                                                                                                                                                                                                                                                                                                                                                                                                                                                                                                                                                                                                                                                                                                                                                                                                                                                                                                                                                                                                                                                                                                                                                                                                                                                                                                                                                                                                                                                                                                                                                                                                                                                                                                                                                                                                                                                                                                                                                                                                                                                                                                                                                                                                                                                                                                                                                                                                                                                                                                                                                                                                                                                                                                                                                                                                                                                                                                                                                                                                                                                                                                                                                                                                             | 2.08653100                                                                          | -2.04831700                                                                          | -0.37841800 |             |             |            |   |            |             |            |   |            |             |            |   |            |             |            |   |            |             |            |   |            |             |            |   |            |             |             |   |            |             |             |   |            |            |             |   |            |             |             |   |            |            |             |   |             |            |            |   |             |            |             |   |            |            |            |   |            |            |            |   |            |             |            |   |            |            |            |   |             |            |            |   |            |             |            |   |            |             |            |   |            |             |            |   |            |             |            |   |            |             |             |   |            |             |            |   |            |             |             |   |             |            |            |   |             |            |            |   |             |            |            |   |             |            |            |   |             |            |             |   |             |            |            |   |             |            |            |   |            |            |             |   |            |            |             |   |            |            |             |   |            |            |             |   |            |            |             |   |            |            |             |   |            |            |            |   |             |             |             |
| H                                                                                                                                                                                                                                                                                                                                                                                                                                                                                                                                                                                                                                                                                                                                                                                                                                                                                                                                                                                                                                                                                                                                                                                                                                                                                                                                                                                                                                                                                                                                                                                                                                                                                                                                                                                                                                                                                                                                                                                                                                                                                                                                                                                                                                                                                                                                                                                                                                                                                                                                                                                                                                                                                                                                                                                                                                                                                                                                                                                                                                                                                                                                                                                                                                                                                                                             | 0.32336100                                                                          | -2.06597400                                                                          | -0.42283700 |             |             |            |   |            |             |            |   |            |             |            |   |            |             |            |   |            |             |            |   |            |             |            |   |            |             |             |   |            |             |             |   |            |            |             |   |            |             |             |   |            |            |             |   |             |            |            |   |             |            |             |   |            |            |            |   |            |            |            |   |            |             |            |   |            |            |            |   |             |            |            |   |            |             |            |   |            |             |            |   |            |             |            |   |            |             |            |   |            |             |             |   |            |             |            |   |            |             |             |   |             |            |            |   |             |            |            |   |             |            |            |   |             |            |            |   |             |            |             |   |             |            |            |   |             |            |            |   |            |            |             |   |            |            |             |   |            |            |             |   |            |            |             |   |            |            |             |   |            |            |             |   |            |            |            |   |             |             |             |
| C                                                                                                                                                                                                                                                                                                                                                                                                                                                                                                                                                                                                                                                                                                                                                                                                                                                                                                                                                                                                                                                                                                                                                                                                                                                                                                                                                                                                                                                                                                                                                                                                                                                                                                                                                                                                                                                                                                                                                                                                                                                                                                                                                                                                                                                                                                                                                                                                                                                                                                                                                                                                                                                                                                                                                                                                                                                                                                                                                                                                                                                                                                                                                                                                                                                                                                                             | 1.93465800                                                                          | 0.73329000                                                                           | -0.50543100 |             |             |            |   |            |             |            |   |            |             |            |   |            |             |            |   |            |             |            |   |            |             |            |   |            |             |             |   |            |             |             |   |            |            |             |   |            |             |             |   |            |            |             |   |             |            |            |   |             |            |             |   |            |            |            |   |            |            |            |   |            |             |            |   |            |            |            |   |             |            |            |   |            |             |            |   |            |             |            |   |            |             |            |   |            |             |            |   |            |             |             |   |            |             |            |   |            |             |             |   |             |            |            |   |             |            |            |   |             |            |            |   |             |            |            |   |             |            |             |   |             |            |            |   |             |            |            |   |            |            |             |   |            |            |             |   |            |            |             |   |            |            |             |   |            |            |             |   |            |            |             |   |            |            |            |   |             |             |             |
| H                                                                                                                                                                                                                                                                                                                                                                                                                                                                                                                                                                                                                                                                                                                                                                                                                                                                                                                                                                                                                                                                                                                                                                                                                                                                                                                                                                                                                                                                                                                                                                                                                                                                                                                                                                                                                                                                                                                                                                                                                                                                                                                                                                                                                                                                                                                                                                                                                                                                                                                                                                                                                                                                                                                                                                                                                                                                                                                                                                                                                                                                                                                                                                                                                                                                                                                             | 1.83846300                                                                          | -0.00009500                                                                          | -1.30640900 |             |             |            |   |            |             |            |   |            |             |            |   |            |             |            |   |            |             |            |   |            |             |            |   |            |             |             |   |            |             |             |   |            |            |             |   |            |             |             |   |            |            |             |   |             |            |            |   |             |            |             |   |            |            |            |   |            |            |            |   |            |             |            |   |            |            |            |   |             |            |            |   |            |             |            |   |            |             |            |   |            |             |            |   |            |             |            |   |            |             |             |   |            |             |            |   |            |             |             |   |             |            |            |   |             |            |            |   |             |            |            |   |             |            |            |   |             |            |             |   |             |            |            |   |             |            |            |   |            |            |             |   |            |            |             |   |            |            |             |   |            |            |             |   |            |            |             |   |            |            |             |   |            |            |            |   |             |             |             |
| H                                                                                                                                                                                                                                                                                                                                                                                                                                                                                                                                                                                                                                                                                                                                                                                                                                                                                                                                                                                                                                                                                                                                                                                                                                                                                                                                                                                                                                                                                                                                                                                                                                                                                                                                                                                                                                                                                                                                                                                                                                                                                                                                                                                                                                                                                                                                                                                                                                                                                                                                                                                                                                                                                                                                                                                                                                                                                                                                                                                                                                                                                                                                                                                                                                                                                                                             | 1.65617600                                                                          | 1.69798200                                                                           | -0.91606700 |             |             |            |   |            |             |            |   |            |             |            |   |            |             |            |   |            |             |            |   |            |             |            |   |            |             |             |   |            |             |             |   |            |            |             |   |            |             |             |   |            |            |             |   |             |            |            |   |             |            |             |   |            |            |            |   |            |            |            |   |            |             |            |   |            |            |            |   |             |            |            |   |            |             |            |   |            |             |            |   |            |             |            |   |            |             |            |   |            |             |             |   |            |             |            |   |            |             |             |   |             |            |            |   |             |            |            |   |             |            |            |   |             |            |            |   |             |            |             |   |             |            |            |   |             |            |            |   |            |            |             |   |            |            |             |   |            |            |             |   |            |            |             |   |            |            |             |   |            |            |             |   |            |            |            |   |             |             |             |
| C                                                                                                                                                                                                                                                                                                                                                                                                                                                                                                                                                                                                                                                                                                                                                                                                                                                                                                                                                                                                                                                                                                                                                                                                                                                                                                                                                                                                                                                                                                                                                                                                                                                                                                                                                                                                                                                                                                                                                                                                                                                                                                                                                                                                                                                                                                                                                                                                                                                                                                                                                                                                                                                                                                                                                                                                                                                                                                                                                                                                                                                                                                                                                                                                                                                                                                                             | -0.37123300                                                                         | 2.44246100                                                                           | 0.24836400  |             |             |            |   |            |             |            |   |            |             |            |   |            |             |            |   |            |             |            |   |            |             |            |   |            |             |             |   |            |             |             |   |            |            |             |   |            |             |             |   |            |            |             |   |             |            |            |   |             |            |             |   |            |            |            |   |            |            |            |   |            |             |            |   |            |            |            |   |             |            |            |   |            |             |            |   |            |             |            |   |            |             |            |   |            |             |            |   |            |             |             |   |            |             |            |   |            |             |             |   |             |            |            |   |             |            |            |   |             |            |            |   |             |            |            |   |             |            |             |   |             |            |            |   |             |            |            |   |            |            |             |   |            |            |             |   |            |            |             |   |            |            |             |   |            |            |             |   |            |            |             |   |            |            |            |   |             |             |             |
| H                                                                                                                                                                                                                                                                                                                                                                                                                                                                                                                                                                                                                                                                                                                                                                                                                                                                                                                                                                                                                                                                                                                                                                                                                                                                                                                                                                                                                                                                                                                                                                                                                                                                                                                                                                                                                                                                                                                                                                                                                                                                                                                                                                                                                                                                                                                                                                                                                                                                                                                                                                                                                                                                                                                                                                                                                                                                                                                                                                                                                                                                                                                                                                                                                                                                                                                             | -0.56575100                                                                         | 2.31412800                                                                           | -0.82087800 |             |             |            |   |            |             |            |   |            |             |            |   |            |             |            |   |            |             |            |   |            |             |            |   |            |             |             |   |            |             |             |   |            |            |             |   |            |             |             |   |            |            |             |   |             |            |            |   |             |            |             |   |            |            |            |   |            |            |            |   |            |             |            |   |            |            |            |   |             |            |            |   |            |             |            |   |            |             |            |   |            |             |            |   |            |             |            |   |            |             |             |   |            |             |            |   |            |             |             |   |             |            |            |   |             |            |            |   |             |            |            |   |             |            |            |   |             |            |             |   |             |            |            |   |             |            |            |   |            |            |             |   |            |            |             |   |            |            |             |   |            |            |             |   |            |            |             |   |            |            |             |   |            |            |            |   |             |             |             |
| H                                                                                                                                                                                                                                                                                                                                                                                                                                                                                                                                                                                                                                                                                                                                                                                                                                                                                                                                                                                                                                                                                                                                                                                                                                                                                                                                                                                                                                                                                                                                                                                                                                                                                                                                                                                                                                                                                                                                                                                                                                                                                                                                                                                                                                                                                                                                                                                                                                                                                                                                                                                                                                                                                                                                                                                                                                                                                                                                                                                                                                                                                                                                                                                                                                                                                                                             | 0.51153400                                                                          | 3.08580000                                                                           | 0.32439000  |             |             |            |   |            |             |            |   |            |             |            |   |            |             |            |   |            |             |            |   |            |             |            |   |            |             |             |   |            |             |             |   |            |            |             |   |            |             |             |   |            |            |             |   |             |            |            |   |             |            |             |   |            |            |            |   |            |            |            |   |            |             |            |   |            |            |            |   |             |            |            |   |            |             |            |   |            |             |            |   |            |             |            |   |            |             |            |   |            |             |             |   |            |             |            |   |            |             |             |   |             |            |            |   |             |            |            |   |             |            |            |   |             |            |            |   |             |            |             |   |             |            |            |   |             |            |            |   |            |            |             |   |            |            |             |   |            |            |             |   |            |            |             |   |            |            |             |   |            |            |             |   |            |            |            |   |             |             |             |
| C                                                                                                                                                                                                                                                                                                                                                                                                                                                                                                                                                                                                                                                                                                                                                                                                                                                                                                                                                                                                                                                                                                                                                                                                                                                                                                                                                                                                                                                                                                                                                                                                                                                                                                                                                                                                                                                                                                                                                                                                                                                                                                                                                                                                                                                                                                                                                                                                                                                                                                                                                                                                                                                                                                                                                                                                                                                                                                                                                                                                                                                                                                                                                                                                                                                                                                                             | 3.36486100                                                                          | 0.78125300                                                                           | 0.02458500  |             |             |            |   |            |             |            |   |            |             |            |   |            |             |            |   |            |             |            |   |            |             |            |   |            |             |             |   |            |             |             |   |            |            |             |   |            |             |             |   |            |            |             |   |             |            |            |   |             |            |             |   |            |            |            |   |            |            |            |   |            |             |            |   |            |            |            |   |             |            |            |   |            |             |            |   |            |             |            |   |            |             |            |   |            |             |            |   |            |             |             |   |            |             |            |   |            |             |             |   |             |            |            |   |             |            |            |   |             |            |            |   |             |            |            |   |             |            |             |   |             |            |            |   |             |            |            |   |            |            |             |   |            |            |             |   |            |            |             |   |            |            |             |   |            |            |             |   |            |            |             |   |            |            |            |   |             |             |             |
| H                                                                                                                                                                                                                                                                                                                                                                                                                                                                                                                                                                                                                                                                                                                                                                                                                                                                                                                                                                                                                                                                                                                                                                                                                                                                                                                                                                                                                                                                                                                                                                                                                                                                                                                                                                                                                                                                                                                                                                                                                                                                                                                                                                                                                                                                                                                                                                                                                                                                                                                                                                                                                                                                                                                                                                                                                                                                                                                                                                                                                                                                                                                                                                                                                                                                                                                             | 3.67152900                                                                          | -0.20545200                                                                          | 0.37834800  |             |             |            |   |            |             |            |   |            |             |            |   |            |             |            |   |            |             |            |   |            |             |            |   |            |             |             |   |            |             |             |   |            |            |             |   |            |             |             |   |            |            |             |   |             |            |            |   |             |            |             |   |            |            |            |   |            |            |            |   |            |             |            |   |            |            |            |   |             |            |            |   |            |             |            |   |            |             |            |   |            |             |            |   |            |             |            |   |            |             |             |   |            |             |            |   |            |             |             |   |             |            |            |   |             |            |            |   |             |            |            |   |             |            |            |   |             |            |             |   |             |            |            |   |             |            |            |   |            |            |             |   |            |            |             |   |            |            |             |   |            |            |             |   |            |            |             |   |            |            |             |   |            |            |            |   |             |             |             |
| H                                                                                                                                                                                                                                                                                                                                                                                                                                                                                                                                                                                                                                                                                                                                                                                                                                                                                                                                                                                                                                                                                                                                                                                                                                                                                                                                                                                                                                                                                                                                                                                                                                                                                                                                                                                                                                                                                                                                                                                                                                                                                                                                                                                                                                                                                                                                                                                                                                                                                                                                                                                                                                                                                                                                                                                                                                                                                                                                                                                                                                                                                                                                                                                                                                                                                                                             | 3.40688800                                                                          | 1.45785100                                                                           | 0.88274800  |             |             |            |   |            |             |            |   |            |             |            |   |            |             |            |   |            |             |            |   |            |             |            |   |            |             |             |   |            |             |             |   |            |            |             |   |            |             |             |   |            |            |             |   |             |            |            |   |             |            |             |   |            |            |            |   |            |            |            |   |            |             |            |   |            |            |            |   |             |            |            |   |            |             |            |   |            |             |            |   |            |             |            |   |            |             |            |   |            |             |             |   |            |             |            |   |            |             |             |   |             |            |            |   |             |            |            |   |             |            |            |   |             |            |            |   |             |            |             |   |             |            |            |   |             |            |            |   |            |            |             |   |            |            |             |   |            |            |             |   |            |            |             |   |            |            |             |   |            |            |             |   |            |            |            |   |             |             |             |
| H                                                                                                                                                                                                                                                                                                                                                                                                                                                                                                                                                                                                                                                                                                                                                                                                                                                                                                                                                                                                                                                                                                                                                                                                                                                                                                                                                                                                                                                                                                                                                                                                                                                                                                                                                                                                                                                                                                                                                                                                                                                                                                                                                                                                                                                                                                                                                                                                                                                                                                                                                                                                                                                                                                                                                                                                                                                                                                                                                                                                                                                                                                                                                                                                                                                                                                                             | -0.70386300                                                                         | 0.73478300                                                                           | 1.61271100  |             |             |            |   |            |             |            |   |            |             |            |   |            |             |            |   |            |             |            |   |            |             |            |   |            |             |             |   |            |             |             |   |            |            |             |   |            |             |             |   |            |            |             |   |             |            |            |   |             |            |             |   |            |            |            |   |            |            |            |   |            |             |            |   |            |            |            |   |             |            |            |   |            |             |            |   |            |             |            |   |            |             |            |   |            |             |            |   |            |             |             |   |            |             |            |   |            |             |             |   |             |            |            |   |             |            |            |   |             |            |            |   |             |            |            |   |             |            |             |   |             |            |            |   |             |            |            |   |            |            |             |   |            |            |             |   |            |            |             |   |            |            |             |   |            |            |             |   |            |            |             |   |            |            |            |   |             |             |             |
| C                                                                                                                                                                                                                                                                                                                                                                                                                                                                                                                                                                                                                                                                                                                                                                                                                                                                                                                                                                                                                                                                                                                                                                                                                                                                                                                                                                                                                                                                                                                                                                                                                                                                                                                                                                                                                                                                                                                                                                                                                                                                                                                                                                                                                                                                                                                                                                                                                                                                                                                                                                                                                                                                                                                                                                                                                                                                                                                                                                                                                                                                                                                                                                                                                                                                                                                             | 1.19434400                                                                          | -3.44140900                                                                          | 0.99499600  |             |             |            |   |            |             |            |   |            |             |            |   |            |             |            |   |            |             |            |   |            |             |            |   |            |             |             |   |            |             |             |   |            |            |             |   |            |             |             |   |            |            |             |   |             |            |            |   |             |            |             |   |            |            |            |   |            |            |            |   |            |             |            |   |            |            |            |   |             |            |            |   |            |             |            |   |            |             |            |   |            |             |            |   |            |             |            |   |            |             |             |   |            |             |            |   |            |             |             |   |             |            |            |   |             |            |            |   |             |            |            |   |             |            |            |   |             |            |             |   |             |            |            |   |             |            |            |   |            |            |             |   |            |            |             |   |            |            |             |   |            |            |             |   |            |            |             |   |            |            |             |   |            |            |            |   |             |             |             |
| H                                                                                                                                                                                                                                                                                                                                                                                                                                                                                                                                                                                                                                                                                                                                                                                                                                                                                                                                                                                                                                                                                                                                                                                                                                                                                                                                                                                                                                                                                                                                                                                                                                                                                                                                                                                                                                                                                                                                                                                                                                                                                                                                                                                                                                                                                                                                                                                                                                                                                                                                                                                                                                                                                                                                                                                                                                                                                                                                                                                                                                                                                                                                                                                                                                                                                                                             | 0.29016100                                                                          | -3.51225400                                                                          | 1.60716200  |             |             |            |   |            |             |            |   |            |             |            |   |            |             |            |   |            |             |            |   |            |             |            |   |            |             |             |   |            |             |             |   |            |            |             |   |            |             |             |   |            |            |             |   |             |            |            |   |             |            |             |   |            |            |            |   |            |            |            |   |            |             |            |   |            |            |            |   |             |            |            |   |            |             |            |   |            |             |            |   |            |             |            |   |            |             |            |   |            |             |             |   |            |             |            |   |            |             |             |   |             |            |            |   |             |            |            |   |             |            |            |   |             |            |            |   |             |            |             |   |             |            |            |   |             |            |            |   |            |            |             |   |            |            |             |   |            |            |             |   |            |            |             |   |            |            |             |   |            |            |             |   |            |            |            |   |             |             |             |
| H                                                                                                                                                                                                                                                                                                                                                                                                                                                                                                                                                                                                                                                                                                                                                                                                                                                                                                                                                                                                                                                                                                                                                                                                                                                                                                                                                                                                                                                                                                                                                                                                                                                                                                                                                                                                                                                                                                                                                                                                                                                                                                                                                                                                                                                                                                                                                                                                                                                                                                                                                                                                                                                                                                                                                                                                                                                                                                                                                                                                                                                                                                                                                                                                                                                                                                                             | 2.04149600                                                                          | -3.46505600                                                                          | 1.68764300  |             |             |            |   |            |             |            |   |            |             |            |   |            |             |            |   |            |             |            |   |            |             |            |   |            |             |             |   |            |             |             |   |            |            |             |   |            |             |             |   |            |            |             |   |             |            |            |   |             |            |             |   |            |            |            |   |            |            |            |   |            |             |            |   |            |            |            |   |             |            |            |   |            |             |            |   |            |             |            |   |            |             |            |   |            |             |            |   |            |             |             |   |            |             |            |   |            |             |             |   |             |            |            |   |             |            |            |   |             |            |            |   |             |            |            |   |             |            |             |   |             |            |            |   |             |            |            |   |            |            |             |   |            |            |             |   |            |            |             |   |            |            |             |   |            |            |             |   |            |            |             |   |            |            |            |   |             |             |             |
| C                                                                                                                                                                                                                                                                                                                                                                                                                                                                                                                                                                                                                                                                                                                                                                                                                                                                                                                                                                                                                                                                                                                                                                                                                                                                                                                                                                                                                                                                                                                                                                                                                                                                                                                                                                                                                                                                                                                                                                                                                                                                                                                                                                                                                                                                                                                                                                                                                                                                                                                                                                                                                                                                                                                                                                                                                                                                                                                                                                                                                                                                                                                                                                                                                                                                                                                             | 1.26829400                                                                          | -4.63817100                                                                          | 0.04939900  |             |             |            |   |            |             |            |   |            |             |            |   |            |             |            |   |            |             |            |   |            |             |            |   |            |             |             |   |            |             |             |   |            |            |             |   |            |             |             |   |            |            |             |   |             |            |            |   |             |            |             |   |            |            |            |   |            |            |            |   |            |             |            |   |            |            |            |   |             |            |            |   |            |             |            |   |            |             |            |   |            |             |            |   |            |             |            |   |            |             |             |   |            |             |            |   |            |             |             |   |             |            |            |   |             |            |            |   |             |            |            |   |             |            |            |   |             |            |             |   |             |            |            |   |             |            |            |   |            |            |             |   |            |            |             |   |            |            |             |   |            |            |             |   |            |            |             |   |            |            |             |   |            |            |            |   |             |             |             |
| H                                                                                                                                                                                                                                                                                                                                                                                                                                                                                                                                                                                                                                                                                                                                                                                                                                                                                                                                                                                                                                                                                                                                                                                                                                                                                                                                                                                                                                                                                                                                                                                                                                                                                                                                                                                                                                                                                                                                                                                                                                                                                                                                                                                                                                                                                                                                                                                                                                                                                                                                                                                                                                                                                                                                                                                                                                                                                                                                                                                                                                                                                                                                                                                                                                                                                                                             | 2.18039600                                                                          | -4.60758500                                                                          | -0.55157700 |             |             |            |   |            |             |            |   |            |             |            |   |            |             |            |   |            |             |            |   |            |             |            |   |            |             |             |   |            |             |             |   |            |            |             |   |            |             |             |   |            |            |             |   |             |            |            |   |             |            |             |   |            |            |            |   |            |            |            |   |            |             |            |   |            |            |            |   |             |            |            |   |            |             |            |   |            |             |            |   |            |             |            |   |            |             |            |   |            |             |             |   |            |             |            |   |            |             |             |   |             |            |            |   |             |            |            |   |             |            |            |   |             |            |            |   |             |            |             |   |             |            |            |   |             |            |            |   |            |            |             |   |            |            |             |   |            |            |             |   |            |            |             |   |            |            |             |   |            |            |             |   |            |            |            |   |             |             |             |
| H                                                                                                                                                                                                                                                                                                                                                                                                                                                                                                                                                                                                                                                                                                                                                                                                                                                                                                                                                                                                                                                                                                                                                                                                                                                                                                                                                                                                                                                                                                                                                                                                                                                                                                                                                                                                                                                                                                                                                                                                                                                                                                                                                                                                                                                                                                                                                                                                                                                                                                                                                                                                                                                                                                                                                                                                                                                                                                                                                                                                                                                                                                                                                                                                                                                                                                                             | 1.26274800                                                                          | -5.57880800                                                                          | 0.60285100  |             |             |            |   |            |             |            |   |            |             |            |   |            |             |            |   |            |             |            |   |            |             |            |   |            |             |             |   |            |             |             |   |            |            |             |   |            |             |             |   |            |            |             |   |             |            |            |   |             |            |             |   |            |            |            |   |            |            |            |   |            |             |            |   |            |            |            |   |             |            |            |   |            |             |            |   |            |             |            |   |            |             |            |   |            |             |            |   |            |             |             |   |            |             |            |   |            |             |             |   |             |            |            |   |             |            |            |   |             |            |            |   |             |            |            |   |             |            |             |   |             |            |            |   |             |            |            |   |            |            |             |   |            |            |             |   |            |            |             |   |            |            |             |   |            |            |             |   |            |            |             |   |            |            |            |   |             |             |             |
| H                                                                                                                                                                                                                                                                                                                                                                                                                                                                                                                                                                                                                                                                                                                                                                                                                                                                                                                                                                                                                                                                                                                                                                                                                                                                                                                                                                                                                                                                                                                                                                                                                                                                                                                                                                                                                                                                                                                                                                                                                                                                                                                                                                                                                                                                                                                                                                                                                                                                                                                                                                                                                                                                                                                                                                                                                                                                                                                                                                                                                                                                                                                                                                                                                                                                                                                             | 0.41761900                                                                          | -4.64664800                                                                          | -0.63610600 |             |             |            |   |            |             |            |   |            |             |            |   |            |             |            |   |            |             |            |   |            |             |            |   |            |             |             |   |            |             |             |   |            |            |             |   |            |             |             |   |            |            |             |   |             |            |            |   |             |            |             |   |            |            |            |   |            |            |            |   |            |             |            |   |            |            |            |   |             |            |            |   |            |             |            |   |            |             |            |   |            |             |            |   |            |             |            |   |            |             |             |   |            |             |            |   |            |             |             |   |             |            |            |   |             |            |            |   |             |            |            |   |             |            |            |   |             |            |             |   |             |            |            |   |             |            |            |   |            |            |             |   |            |            |             |   |            |            |             |   |            |            |             |   |            |            |             |   |            |            |             |   |            |            |            |   |             |             |             |
| C                                                                                                                                                                                                                                                                                                                                                                                                                                                                                                                                                                                                                                                                                                                                                                                                                                                                                                                                                                                                                                                                                                                                                                                                                                                                                                                                                                                                                                                                                                                                                                                                                                                                                                                                                                                                                                                                                                                                                                                                                                                                                                                                                                                                                                                                                                                                                                                                                                                                                                                                                                                                                                                                                                                                                                                                                                                                                                                                                                                                                                                                                                                                                                                                                                                                                                                             | -1.57054800                                                                         | 3.10491100                                                                           | 0.92801100  |             |             |            |   |            |             |            |   |            |             |            |   |            |             |            |   |            |             |            |   |            |             |            |   |            |             |             |   |            |             |             |   |            |            |             |   |            |             |             |   |            |            |             |   |             |            |            |   |             |            |             |   |            |            |            |   |            |            |            |   |            |             |            |   |            |            |            |   |             |            |            |   |            |             |            |   |            |             |            |   |            |             |            |   |            |             |            |   |            |             |             |   |            |             |            |   |            |             |             |   |             |            |            |   |             |            |            |   |             |            |            |   |             |            |            |   |             |            |             |   |             |            |            |   |             |            |            |   |            |            |             |   |            |            |             |   |            |            |             |   |            |            |             |   |            |            |             |   |            |            |             |   |            |            |            |   |             |             |             |
| H                                                                                                                                                                                                                                                                                                                                                                                                                                                                                                                                                                                                                                                                                                                                                                                                                                                                                                                                                                                                                                                                                                                                                                                                                                                                                                                                                                                                                                                                                                                                                                                                                                                                                                                                                                                                                                                                                                                                                                                                                                                                                                                                                                                                                                                                                                                                                                                                                                                                                                                                                                                                                                                                                                                                                                                                                                                                                                                                                                                                                                                                                                                                                                                                                                                                                                                             | -1.35716700                                                                         | 3.22553100                                                                           | 1.99371300  |             |             |            |   |            |             |            |   |            |             |            |   |            |             |            |   |            |             |            |   |            |             |            |   |            |             |             |   |            |             |             |   |            |            |             |   |            |             |             |   |            |            |             |   |             |            |            |   |             |            |             |   |            |            |            |   |            |            |            |   |            |             |            |   |            |            |            |   |             |            |            |   |            |             |            |   |            |             |            |   |            |             |            |   |            |             |            |   |            |             |             |   |            |             |            |   |            |             |             |   |             |            |            |   |             |            |            |   |             |            |            |   |             |            |            |   |             |            |             |   |             |            |            |   |             |            |            |   |            |            |             |   |            |            |             |   |            |            |             |   |            |            |             |   |            |            |             |   |            |            |             |   |            |            |            |   |             |             |             |
| H                                                                                                                                                                                                                                                                                                                                                                                                                                                                                                                                                                                                                                                                                                                                                                                                                                                                                                                                                                                                                                                                                                                                                                                                                                                                                                                                                                                                                                                                                                                                                                                                                                                                                                                                                                                                                                                                                                                                                                                                                                                                                                                                                                                                                                                                                                                                                                                                                                                                                                                                                                                                                                                                                                                                                                                                                                                                                                                                                                                                                                                                                                                                                                                                                                                                                                                             | -2.43027300                                                                         | 2.43549300                                                                           | 0.84784300  |             |             |            |   |            |             |            |   |            |             |            |   |            |             |            |   |            |             |            |   |            |             |            |   |            |             |             |   |            |             |             |   |            |            |             |   |            |             |             |   |            |            |             |   |             |            |            |   |             |            |             |   |            |            |            |   |            |            |            |   |            |             |            |   |            |            |            |   |             |            |            |   |            |             |            |   |            |             |            |   |            |             |            |   |            |             |            |   |            |             |             |   |            |             |            |   |            |             |             |   |             |            |            |   |             |            |            |   |             |            |            |   |             |            |            |   |             |            |             |   |             |            |            |   |             |            |            |   |            |            |             |   |            |            |             |   |            |            |             |   |            |            |             |   |            |            |             |   |            |            |             |   |            |            |            |   |             |             |             |
| C                                                                                                                                                                                                                                                                                                                                                                                                                                                                                                                                                                                                                                                                                                                                                                                                                                                                                                                                                                                                                                                                                                                                                                                                                                                                                                                                                                                                                                                                                                                                                                                                                                                                                                                                                                                                                                                                                                                                                                                                                                                                                                                                                                                                                                                                                                                                                                                                                                                                                                                                                                                                                                                                                                                                                                                                                                                                                                                                                                                                                                                                                                                                                                                                                                                                                                                             | -1.89928200                                                                         | 4.45905100                                                                           | 0.30788100  |             |             |            |   |            |             |            |   |            |             |            |   |            |             |            |   |            |             |            |   |            |             |            |   |            |             |             |   |            |             |             |   |            |            |             |   |            |             |             |   |            |            |             |   |             |            |            |   |             |            |             |   |            |            |            |   |            |            |            |   |            |             |            |   |            |            |            |   |             |            |            |   |            |             |            |   |            |             |            |   |            |             |            |   |            |             |            |   |            |             |             |   |            |             |            |   |            |             |             |   |             |            |            |   |             |            |            |   |             |            |            |   |             |            |            |   |             |            |             |   |             |            |            |   |             |            |            |   |            |            |             |   |            |            |             |   |            |            |             |   |            |            |             |   |            |            |             |   |            |            |             |   |            |            |            |   |             |             |             |
| H                                                                                                                                                                                                                                                                                                                                                                                                                                                                                                                                                                                                                                                                                                                                                                                                                                                                                                                                                                                                                                                                                                                                                                                                                                                                                                                                                                                                                                                                                                                                                                                                                                                                                                                                                                                                                                                                                                                                                                                                                                                                                                                                                                                                                                                                                                                                                                                                                                                                                                                                                                                                                                                                                                                                                                                                                                                                                                                                                                                                                                                                                                                                                                                                                                                                                                                             | -2.14319100                                                                         | 4.35514600                                                                           | -0.75212800 |             |             |            |   |            |             |            |   |            |             |            |   |            |             |            |   |            |             |            |   |            |             |            |   |            |             |             |   |            |             |             |   |            |            |             |   |            |             |             |   |            |            |             |   |             |            |            |   |             |            |             |   |            |            |            |   |            |            |            |   |            |             |            |   |            |            |            |   |             |            |            |   |            |             |            |   |            |             |            |   |            |             |            |   |            |             |            |   |            |             |             |   |            |             |            |   |            |             |             |   |             |            |            |   |             |            |            |   |             |            |            |   |             |            |            |   |             |            |             |   |             |            |            |   |             |            |            |   |            |            |             |   |            |            |             |   |            |            |             |   |            |            |             |   |            |            |             |   |            |            |             |   |            |            |            |   |             |             |             |
| H                                                                                                                                                                                                                                                                                                                                                                                                                                                                                                                                                                                                                                                                                                                                                                                                                                                                                                                                                                                                                                                                                                                                                                                                                                                                                                                                                                                                                                                                                                                                                                                                                                                                                                                                                                                                                                                                                                                                                                                                                                                                                                                                                                                                                                                                                                                                                                                                                                                                                                                                                                                                                                                                                                                                                                                                                                                                                                                                                                                                                                                                                                                                                                                                                                                                                                                             | -2.75479000                                                                         | 4.91804600                                                                           | 0.80535400  |             |             |            |   |            |             |            |   |            |             |            |   |            |             |            |   |            |             |            |   |            |             |            |   |            |             |             |   |            |             |             |   |            |            |             |   |            |             |             |   |            |            |             |   |             |            |            |   |             |            |             |   |            |            |            |   |            |            |            |   |            |             |            |   |            |            |            |   |             |            |            |   |            |             |            |   |            |             |            |   |            |             |            |   |            |             |            |   |            |             |             |   |            |             |            |   |            |             |             |   |             |            |            |   |             |            |            |   |             |            |            |   |             |            |            |   |             |            |             |   |             |            |            |   |             |            |            |   |            |            |             |   |            |            |             |   |            |            |             |   |            |            |             |   |            |            |             |   |            |            |             |   |            |            |            |   |             |             |             |
| H                                                                                                                                                                                                                                                                                                                                                                                                                                                                                                                                                                                                                                                                                                                                                                                                                                                                                                                                                                                                                                                                                                                                                                                                                                                                                                                                                                                                                                                                                                                                                                                                                                                                                                                                                                                                                                                                                                                                                                                                                                                                                                                                                                                                                                                                                                                                                                                                                                                                                                                                                                                                                                                                                                                                                                                                                                                                                                                                                                                                                                                                                                                                                                                                                                                                                                                             | -1.05403500                                                                         | 5.14673600                                                                           | 0.39017600  |             |             |            |   |            |             |            |   |            |             |            |   |            |             |            |   |            |             |            |   |            |             |            |   |            |             |             |   |            |             |             |   |            |            |             |   |            |             |             |   |            |            |             |   |             |            |            |   |             |            |             |   |            |            |            |   |            |            |            |   |            |             |            |   |            |            |            |   |             |            |            |   |            |             |            |   |            |             |            |   |            |             |            |   |            |             |            |   |            |             |             |   |            |             |            |   |            |             |             |   |             |            |            |   |             |            |            |   |             |            |            |   |             |            |            |   |             |            |             |   |             |            |            |   |             |            |            |   |            |            |             |   |            |            |             |   |            |            |             |   |            |            |             |   |            |            |             |   |            |            |             |   |            |            |            |   |             |             |             |
| C                                                                                                                                                                                                                                                                                                                                                                                                                                                                                                                                                                                                                                                                                                                                                                                                                                                                                                                                                                                                                                                                                                                                                                                                                                                                                                                                                                                                                                                                                                                                                                                                                                                                                                                                                                                                                                                                                                                                                                                                                                                                                                                                                                                                                                                                                                                                                                                                                                                                                                                                                                                                                                                                                                                                                                                                                                                                                                                                                                                                                                                                                                                                                                                                                                                                                                                             | 4.33816600                                                                          | 1.25024400                                                                           | -1.05720000 |             |             |            |   |            |             |            |   |            |             |            |   |            |             |            |   |            |             |            |   |            |             |            |   |            |             |             |   |            |             |             |   |            |            |             |   |            |             |             |   |            |            |             |   |             |            |            |   |             |            |             |   |            |            |            |   |            |            |            |   |            |             |            |   |            |            |            |   |             |            |            |   |            |             |            |   |            |             |            |   |            |             |            |   |            |             |            |   |            |             |             |   |            |             |            |   |            |             |             |   |             |            |            |   |             |            |            |   |             |            |            |   |             |            |            |   |             |            |             |   |             |            |            |   |             |            |            |   |            |            |             |   |            |            |             |   |            |            |             |   |            |            |             |   |            |            |             |   |            |            |             |   |            |            |            |   |             |             |             |
| H                                                                                                                                                                                                                                                                                                                                                                                                                                                                                                                                                                                                                                                                                                                                                                                                                                                                                                                                                                                                                                                                                                                                                                                                                                                                                                                                                                                                                                                                                                                                                                                                                                                                                                                                                                                                                                                                                                                                                                                                                                                                                                                                                                                                                                                                                                                                                                                                                                                                                                                                                                                                                                                                                                                                                                                                                                                                                                                                                                                                                                                                                                                                                                                                                                                                                                                             | 4.04092100                                                                          | 2.24376700                                                                           | -1.40606600 |             |             |            |   |            |             |            |   |            |             |            |   |            |             |            |   |            |             |            |   |            |             |            |   |            |             |             |   |            |             |             |   |            |            |             |   |            |             |             |   |            |            |             |   |             |            |            |   |             |            |             |   |            |            |            |   |            |            |            |   |            |             |            |   |            |            |            |   |             |            |            |   |            |             |            |   |            |             |            |   |            |             |            |   |            |             |            |   |            |             |             |   |            |             |            |   |            |             |             |   |             |            |            |   |             |            |            |   |             |            |            |   |             |            |            |   |             |            |             |   |             |            |            |   |             |            |            |   |            |            |             |   |            |            |             |   |            |            |             |   |            |            |             |   |            |            |             |   |            |            |             |   |            |            |            |   |             |             |             |
| H                                                                                                                                                                                                                                                                                                                                                                                                                                                                                                                                                                                                                                                                                                                                                                                                                                                                                                                                                                                                                                                                                                                                                                                                                                                                                                                                                                                                                                                                                                                                                                                                                                                                                                                                                                                                                                                                                                                                                                                                                                                                                                                                                                                                                                                                                                                                                                                                                                                                                                                                                                                                                                                                                                                                                                                                                                                                                                                                                                                                                                                                                                                                                                                                                                                                                                                             | 4.26509100                                                                          | 0.58286400                                                                           | -1.92145100 |             |             |            |   |            |             |            |   |            |             |            |   |            |             |            |   |            |             |            |   |            |             |            |   |            |             |             |   |            |             |             |   |            |            |             |   |            |             |             |   |            |            |             |   |             |            |            |   |             |            |             |   |            |            |            |   |            |            |            |   |            |             |            |   |            |            |            |   |             |            |            |   |            |             |            |   |            |             |            |   |            |             |            |   |            |             |            |   |            |             |             |   |            |             |            |   |            |             |             |   |             |            |            |   |             |            |            |   |             |            |            |   |             |            |            |   |             |            |             |   |             |            |            |   |             |            |            |   |            |            |             |   |            |            |             |   |            |            |             |   |            |            |             |   |            |            |             |   |            |            |             |   |            |            |            |   |             |             |             |
| C                                                                                                                                                                                                                                                                                                                                                                                                                                                                                                                                                                                                                                                                                                                                                                                                                                                                                                                                                                                                                                                                                                                                                                                                                                                                                                                                                                                                                                                                                                                                                                                                                                                                                                                                                                                                                                                                                                                                                                                                                                                                                                                                                                                                                                                                                                                                                                                                                                                                                                                                                                                                                                                                                                                                                                                                                                                                                                                                                                                                                                                                                                                                                                                                                                                                                                                             | 5.78082200                                                                          | 1.28939400                                                                           | -0.55835900 |             |             |            |   |            |             |            |   |            |             |            |   |            |             |            |   |            |             |            |   |            |             |            |   |            |             |             |   |            |             |             |   |            |            |             |   |            |             |             |   |            |            |             |   |             |            |            |   |             |            |             |   |            |            |            |   |            |            |            |   |            |             |            |   |            |            |            |   |             |            |            |   |            |             |            |   |            |             |            |   |            |             |            |   |            |             |            |   |            |             |             |   |            |             |            |   |            |             |             |   |             |            |            |   |             |            |            |   |             |            |            |   |             |            |            |   |             |            |             |   |             |            |            |   |             |            |            |   |            |            |             |   |            |            |             |   |            |            |             |   |            |            |             |   |            |            |             |   |            |            |             |   |            |            |            |   |             |             |             |
| H                                                                                                                                                                                                                                                                                                                                                                                                                                                                                                                                                                                                                                                                                                                                                                                                                                                                                                                                                                                                                                                                                                                                                                                                                                                                                                                                                                                                                                                                                                                                                                                                                                                                                                                                                                                                                                                                                                                                                                                                                                                                                                                                                                                                                                                                                                                                                                                                                                                                                                                                                                                                                                                                                                                                                                                                                                                                                                                                                                                                                                                                                                                                                                                                                                                                                                                             | 6.10984400                                                                          | 0.29917700                                                                           | -0.23415400 |             |             |            |   |            |             |            |   |            |             |            |   |            |             |            |   |            |             |            |   |            |             |            |   |            |             |             |   |            |             |             |   |            |            |             |   |            |             |             |   |            |            |             |   |             |            |            |   |             |            |             |   |            |            |            |   |            |            |            |   |            |             |            |   |            |            |            |   |             |            |            |   |            |             |            |   |            |             |            |   |            |             |            |   |            |             |            |   |            |             |             |   |            |             |            |   |            |             |             |   |             |            |            |   |             |            |            |   |             |            |            |   |             |            |            |   |             |            |             |   |             |            |            |   |             |            |            |   |            |            |             |   |            |            |             |   |            |            |             |   |            |            |             |   |            |            |             |   |            |            |             |   |            |            |            |   |             |             |             |
| H                                                                                                                                                                                                                                                                                                                                                                                                                                                                                                                                                                                                                                                                                                                                                                                                                                                                                                                                                                                                                                                                                                                                                                                                                                                                                                                                                                                                                                                                                                                                                                                                                                                                                                                                                                                                                                                                                                                                                                                                                                                                                                                                                                                                                                                                                                                                                                                                                                                                                                                                                                                                                                                                                                                                                                                                                                                                                                                                                                                                                                                                                                                                                                                                                                                                                                                             | 6.45952300                                                                          | 1.62811400                                                                           | -1.34292900 |             |             |            |   |            |             |            |   |            |             |            |   |            |             |            |   |            |             |            |   |            |             |            |   |            |             |             |   |            |             |             |   |            |            |             |   |            |             |             |   |            |            |             |   |             |            |            |   |             |            |             |   |            |            |            |   |            |            |            |   |            |             |            |   |            |            |            |   |             |            |            |   |            |             |            |   |            |             |            |   |            |             |            |   |            |             |            |   |            |             |             |   |            |             |            |   |            |             |             |   |             |            |            |   |             |            |            |   |             |            |            |   |             |            |            |   |             |            |             |   |             |            |            |   |             |            |            |   |            |            |             |   |            |            |             |   |            |            |             |   |            |            |             |   |            |            |             |   |            |            |             |   |            |            |            |   |             |             |             |
| H                                                                                                                                                                                                                                                                                                                                                                                                                                                                                                                                                                                                                                                                                                                                                                                                                                                                                                                                                                                                                                                                                                                                                                                                                                                                                                                                                                                                                                                                                                                                                                                                                                                                                                                                                                                                                                                                                                                                                                                                                                                                                                                                                                                                                                                                                                                                                                                                                                                                                                                                                                                                                                                                                                                                                                                                                                                                                                                                                                                                                                                                                                                                                                                                                                                                                                                             | 5.88313800                                                                          | 1.96938100                                                                           | 0.29082500  |             |             |            |   |            |             |            |   |            |             |            |   |            |             |            |   |            |             |            |   |            |             |            |   |            |             |             |   |            |             |             |   |            |            |             |   |            |             |             |   |            |            |             |   |             |            |            |   |             |            |             |   |            |            |            |   |            |            |            |   |            |             |            |   |            |            |            |   |             |            |            |   |            |             |            |   |            |             |            |   |            |             |            |   |            |             |            |   |            |             |             |   |            |             |            |   |            |             |             |   |             |            |            |   |             |            |            |   |             |            |            |   |             |            |            |   |             |            |             |   |             |            |            |   |             |            |            |   |            |            |             |   |            |            |             |   |            |            |             |   |            |            |             |   |            |            |             |   |            |            |             |   |            |            |            |   |             |             |             |
| I                                                                                                                                                                                                                                                                                                                                                                                                                                                                                                                                                                                                                                                                                                                                                                                                                                                                                                                                                                                                                                                                                                                                                                                                                                                                                                                                                                                                                                                                                                                                                                                                                                                                                                                                                                                                                                                                                                                                                                                                                                                                                                                                                                                                                                                                                                                                                                                                                                                                                                                                                                                                                                                                                                                                                                                                                                                                                                                                                                                                                                                                                                                                                                                                                                                                                                                             | -2.68463200                                                                         | -0.65876500                                                                          | -0.46268300 |             |             |            |   |            |             |            |   |            |             |            |   |            |             |            |   |            |             |            |   |            |             |            |   |            |             |             |   |            |             |             |   |            |            |             |   |            |             |             |   |            |            |             |   |             |            |            |   |             |            |             |   |            |            |            |   |            |            |            |   |            |             |            |   |            |            |            |   |             |            |            |   |            |             |            |   |            |             |            |   |            |             |            |   |            |             |            |   |            |             |             |   |            |             |            |   |            |             |             |   |             |            |            |   |             |            |            |   |             |            |            |   |             |            |            |   |             |            |             |   |             |            |            |   |             |            |            |   |            |            |             |   |            |            |             |   |            |            |             |   |            |            |             |   |            |            |             |   |            |            |             |   |            |            |            |   |             |             |             |
| 19                                                                                                                                                                                                                                                                                                                                                                                                                                                                                                                                                                                                                                                                                                                                                                                                                                                                                                                                                                                                                                                                                                                                                                                                                                                                                                                                                                                                                                                                                                                                                                                                                                                                                                                                                                                                                                                                                                                                                                                                                                                                                                                                                                                                                                                                                                                                                                                                                                                                                                                                                                                                                                                                                                                                                                                                                                                                                                                                                                                                                                                                                                                                                                                                                                                                                                                            |  |  |             |             |             |            |   |            |             |            |   |            |             |            |   |            |             |            |   |            |             |            |   |            |             |            |   |            |             |             |   |            |             |             |   |            |            |             |   |            |             |             |   |            |            |             |   |             |            |            |   |             |            |             |   |            |            |            |   |            |            |            |   |            |             |            |   |            |            |            |   |             |            |            |   |            |             |            |   |            |             |            |   |            |             |            |   |            |             |            |   |            |             |             |   |            |             |            |   |            |             |             |   |             |            |            |   |             |            |            |   |             |            |            |   |             |            |            |   |             |            |             |   |             |            |            |   |             |            |            |   |            |            |             |   |            |            |             |   |            |            |             |   |            |            |             |   |            |            |             |   |            |            |             |   |            |            |            |   |             |             |             |
| <p>Cartesian Coordinates</p> <table border="1"> <tbody> <tr><td>C</td><td>-1.13730784</td><td>-0.89454655</td><td>0.46010264</td></tr> <tr><td>N</td><td>0.08807916</td><td>-0.27238355</td><td>0.68050464</td></tr> </tbody> </table>                                                                                                                                                                                                                                                                                                                                                                                                                                                                                                                                                                                                                                                                                                                                                                                                                                                                                                                                                                                                                                                                                                                                                                                                                                                                                                                                                                                                                                                                                                                                                                                                                                                                                                                                                                                                                                                                                                                                                                                                                                                                                                                                                                                                                                                                                                                                                                                                                                                                                                                                                                                                                                                                                                                                                                                                                                                                                                                                                                                                                                                                                        |                                                                                     |                                                                                      | C           | -1.13730784 | -0.89454655 | 0.46010264 | N | 0.08807916 | -0.27238355 | 0.68050464 |   |            |             |            |   |            |             |            |   |            |             |            |   |            |             |            |   |            |             |             |   |            |             |             |   |            |            |             |   |            |             |             |   |            |            |             |   |             |            |            |   |             |            |             |   |            |            |            |   |            |            |            |   |            |             |            |   |            |            |            |   |             |            |            |   |            |             |            |   |            |             |            |   |            |             |            |   |            |             |            |   |            |             |             |   |            |             |            |   |            |             |             |   |             |            |            |   |             |            |            |   |             |            |            |   |             |            |            |   |             |            |             |   |             |            |            |   |             |            |            |   |            |            |             |   |            |            |             |   |            |            |             |   |            |            |             |   |            |            |             |   |            |            |             |   |            |            |            |   |             |             |             |
| C                                                                                                                                                                                                                                                                                                                                                                                                                                                                                                                                                                                                                                                                                                                                                                                                                                                                                                                                                                                                                                                                                                                                                                                                                                                                                                                                                                                                                                                                                                                                                                                                                                                                                                                                                                                                                                                                                                                                                                                                                                                                                                                                                                                                                                                                                                                                                                                                                                                                                                                                                                                                                                                                                                                                                                                                                                                                                                                                                                                                                                                                                                                                                                                                                                                                                                                             | -1.13730784                                                                         | -0.89454655                                                                          | 0.46010264  |             |             |            |   |            |             |            |   |            |             |            |   |            |             |            |   |            |             |            |   |            |             |            |   |            |             |             |   |            |             |             |   |            |            |             |   |            |             |             |   |            |            |             |   |             |            |            |   |             |            |             |   |            |            |            |   |            |            |            |   |            |             |            |   |            |            |            |   |             |            |            |   |            |             |            |   |            |             |            |   |            |             |            |   |            |             |            |   |            |             |             |   |            |             |            |   |            |             |             |   |             |            |            |   |             |            |            |   |             |            |            |   |             |            |            |   |             |            |             |   |             |            |            |   |             |            |            |   |            |            |             |   |            |            |             |   |            |            |             |   |            |            |             |   |            |            |             |   |            |            |             |   |            |            |            |   |             |             |             |
| N                                                                                                                                                                                                                                                                                                                                                                                                                                                                                                                                                                                                                                                                                                                                                                                                                                                                                                                                                                                                                                                                                                                                                                                                                                                                                                                                                                                                                                                                                                                                                                                                                                                                                                                                                                                                                                                                                                                                                                                                                                                                                                                                                                                                                                                                                                                                                                                                                                                                                                                                                                                                                                                                                                                                                                                                                                                                                                                                                                                                                                                                                                                                                                                                                                                                                                                             | 0.08807916                                                                          | -0.27238355                                                                          | 0.68050464  |             |             |            |   |            |             |            |   |            |             |            |   |            |             |            |   |            |             |            |   |            |             |            |   |            |             |             |   |            |             |             |   |            |            |             |   |            |             |             |   |            |            |             |   |             |            |            |   |             |            |             |   |            |            |            |   |            |            |            |   |            |             |            |   |            |            |            |   |             |            |            |   |            |             |            |   |            |             |            |   |            |             |            |   |            |             |            |   |            |             |             |   |            |             |            |   |            |             |             |   |             |            |            |   |             |            |            |   |             |            |            |   |             |            |            |   |             |            |             |   |             |            |            |   |             |            |            |   |            |            |             |   |            |            |             |   |            |            |             |   |            |            |             |   |            |            |             |   |            |            |             |   |            |            |            |   |             |             |             |

|   |             |             |             |
|---|-------------|-------------|-------------|
| C | 1.18762016  | -1.15526955 | 1.06629464  |
| H | 0.78127816  | -1.89177355 | 1.76342164  |
| H | 1.92588016  | -0.57732655 | 1.62561964  |
| C | 1.87696416  | -1.88039855 | -0.09331236 |
| H | 2.29739216  | -1.14717855 | -0.78918836 |
| H | 1.12608916  | -2.44814455 | -0.65172536 |
| C | 0.43406916  | 0.88326945  | -0.14817336 |
| H | 0.65403216  | 0.57057945  | -1.18108836 |
| H | -0.44357584 | 1.52686245  | -0.20122936 |
| C | -2.35621184 | -0.11297155 | 0.08466164  |
| H | -2.23363384 | 0.37050945  | -0.89219536 |
| H | -2.53102484 | 0.71353745  | 0.79671164  |
| C | 1.60000616  | 1.70988245  | 0.38609264  |
| H | 2.52765016  | 1.13211645  | 0.35095164  |
| H | 1.41799416  | 1.95100545  | 1.43840264  |
| H | -1.28492384 | -1.78523055 | 1.06217164  |
| C | 2.98701716  | -2.81358755 | 0.38508964  |
| H | 2.56643916  | -3.54818855 | 1.08025864  |
| H | 3.72155216  | -2.23677955 | 0.95736464  |
| C | 3.68934116  | -3.53963655 | -0.76071336 |
| H | 4.15089916  | -2.82831055 | -1.45046736 |
| H | 4.47352516  | -4.20421455 | -0.39197936 |
| H | 2.98060316  | -4.14364455 | -1.33311336 |
| C | -3.61119084 | -0.98816255 | 0.03853964  |
| H | -3.75869084 | -1.45678855 | 1.01702064  |
| H | -3.45061684 | -1.80486855 | -0.67223036 |
| C | -4.86484884 | -0.20699855 | -0.34857236 |
| H | -4.75393984 | 0.24805545  | -1.33636436 |
| H | -5.74479084 | -0.85303955 | -0.37581536 |
| H | -5.06223484 | 0.59660745  | 0.36562764  |
| C | 1.79581916  | 2.99929445  | -0.41160236 |
| H | 0.88270716  | 3.60109145  | -0.35823936 |
| H | 1.93878616  | 2.75130245  | -1.46857536 |
| C | 2.98210516  | 3.82390545  | 0.08364164  |
| H | 3.91238216  | 3.25496245  | 0.00886864  |
| H | 3.10223616  | 4.73939345  | -0.49905436 |
| H | 2.85112916  | 4.10846545  | 1.13083264  |

## 10 References

- 1 L. Chen, J. Liang, zhenyu chen, J. Chen, M. Yan and X. Zhang, *Adv. Synth. Catal.*, 2018, **361**, adsc.201801390.
- 2 B. Liu, C. H. Lim and G. M. Miyake, *J. Am. Chem. Soc.*, 2017, **139**, 13616–13619.
- 3 Z. J. Li, S. Li, E. Hofman, A. Hunter Davis, G. Leem and W. Zheng, *Green Chem.*, 2020, **22**, 1911–1918.
- 4 I. Ghosh, T. Ghosh, J. I. Bardagi and B. König, *Science (80-. )*, 2014, **346**, 725–728.
- 5 J. Hofmann, E. Gans, T. Clark and M. R. Heinrich, *Chem. – A Eur. J.*, 2017, **23**, 9647–9656.
- 6 Y. X. Liu, D. Xue, J. Di Wang, C. J. Zhao, Q. Z. Zou, C. Wang and J. Xiao, *Synlett*, 2013, **24**, 507–513.
- 7 G. Sun, S. Ren, X. Zhu, M. Huang and Y. Wan, *Org. Lett.*, 2016, **18**, 544–547.
- 8 I. Ghosh, R. S. Shaikh and B. König, *Angew. Chemie Int. Ed.*, 2017, **56**, 8544–8549.
- 9 S. Mao, X. Shi, J.-F. Soulé and H. Doucet, *European J. Org. Chem.*, 2020, **2020**, 91–97.
- 10 A. Beladhria, K. Beydoun, H. Ben Ammar, R. Ben Salem and H. Doucet, *Synth.*, 2012, **44**, 2264–2276.
- 11 D. T. Gryko, O. Vakuliuk, D. Gryko and B. Koszarna, *J. Org. Chem.*, 2009, **74**, 9517–9520.
- 12 F. Bilodeau, M. C. Brochu, N. Guimond, K. H. Thesen and P. Forgione, *J. Org. Chem.*, 2010, **75**, 1550–1560.
- 13 M. Neumeier, D. Sampedro, M. Májek, V. A. de la Peña O’Shea, A. Jacobi von Wangelin and R. Pérez-Ruiz, *Chem. - A Eur. J.*, 2018, **24**, 105–108.
- 14 L. Zhao, C. Bruneau and H. Doucet, *ChemCatChem*, 2013, **5**, 255–262.
- 15 M. Dowlut, D. Mallik and M. G. Organ, *Chem. - A Eur. J.*, 2010, **16**, 4279–4283.
- 16 M.-J. Shiao, L.-H. Shih, W.-L. Chia and T.-Y. Chau, *Heterocycles*, 1991, **32**, 2111.
- 17 M. Baloch, D. Roy, S. Bensaid, V. Guerchais and H. Doucet, *Eur. J. Inorg. Chem.*, 2012, **2012**, 4454–4462.

- 18 M. Nayak, Y. K. Kang and I. Kim, *Org. Lett.*, 2017, **19**, 1474–1477.
- 19 J. H. Jang, S. Ahn, S. E. Park, S. Kim, H. R. Byon and J. M. Joo, *Org. Lett.*, , DOI:10.1021/acs.orglett.9b04545.
- 20 N. G. W. Cowper, C. P. Chernowsky, O. P. Williams and Z. K. Wickens, *J. Am. Chem. Soc.*, 2020, **142**, 2093–2099.
- 21 W. Lecroq, P. Bazille, F. Morlet-Savary, M. Breugst, J. Lalevée, A. C. Gaumont and S. Lakhdar, *Org. Lett.*, 2018, **20**, 4164–4167.
- 22 W. Lecroq, P. Bazille, F. Morlet-Savary, M. Breugst, J. Lalevée, A. C. Gaumont and S. Lakhdar, *Org. Lett.*, 2018, **20**, 4164–4167.
- 23 V. V. Pavlishchuk and A. W. Addison, *Inorganica Chim. Acta*, 2000, **298**, 97–102.
- 24 H. G. Roth, N. A. Romero and D. A. Nicewicz, *Synlett*, 2016, **27**, 714–723.
- 25 E. D. Nacsa and D. W. C. MacMillan, *J. Am. Chem. Soc.*, 2018, **140**, 3322–3330.
- 26 H. J. Kuhn, S. E. Braslavsky and R. Schmidt, *Pure Appl. Chem.*, 2004, **76**, 2105–2146.
- 27 M. A. Cismesia and T. P. Yoon, *Chem. Sci.*, 2015, **6**, 5426–5434.
- 28 S. P. Pitre, C. D. McTiernan, W. Vine, R. Dipucchio, M. Grenier and J. C. Scaiano, *Sci. Rep.*, 2015, **5**, 16397.
- 29 R. G. Parr and W. Yang, *Density-Functional Theory of Atoms and Molecules*, Oxford Uni., 1989.
- 30 M. J. Frisch, G. W. Trucks, H. B. Schlegel, G. E. Scuseria, M. A. Robb, J. R. Cheeseman, G. Scalmani, V. Barone, B. Mennucci, G. A. Petersson, H. Nakatsuji, M. Caricato, X. Li, H. P. Hratchian, A. F. Izmaylov, J. Bloino, G. Zheng, J. L. Sonnenberg, M. Hada, M. Ehara, K. Toyota, R. Fukuda, J. Hasegawa, M. Ishida, T. Nakajima, Y. Honda, O. Kitao, H. Nakai, T. Vreven, J. A. Montgomery Jr., J. E. Peralta, F. Ogliar, M. Bearpark, J. J. Heyd, E. Brothers, K. N. Kudin, V. N. Staroverov, T. Keith, R. Kobayashi, J. Normand, K. Raghavachari, A. Rendell, J. C. Burant, S. S. Iyengar, J. Tomasi, M. Cossi, N. Rega, J. M. Millam, M. Klene, J. E. Knox, J. B. Cross, V. Bakken, C. Adamo, J. Jaramillo, R. Gomperts, R. E. Stratmann, O. Yazyev, A. J. Austin, R. Cammi, C. Pomelli, J. W. Ochterski, R. L. Martin, K. Morokuma, V. G. Zakrzewski, G. A. Voth, P. Salvador, J. J. Dannenberg, S. Dapprich, A. D. Daniels, O. Farkas, J. B. Foresman, J. V. Ortiz, J. Cioslowski and D. J. Fox,

- 2013.
- 31 J. Dennington, R., Keith, T. and Millam, 2009.
- 32 A. D. Becke, *J. Chem. Phys.*, 1993, **98**, 5648–5652.
- 33 A. D. Becke, *J. Chem. Phys.*, 1993, **98**, 1372–1377.
- 34 C. Lee, W. Yang and R. G. Parr, *Phys. Rev. B*, 1988, **37**, 785–789.
- 35 P. J. Stephens, F. J. Devlin, C. F. Chabalowski and M. J. Frisch, *J. Phys. Chem.*, 1994, **98**, 11623–11627.
- 36 S. Grimme, J. Antony, S. Ehrlich and H. Krieg, *J. Chem. Phys.*, , DOI:10.1063/1.3382344.
- 37 S. Grimme, S. Ehrlich and L. Goerigk, *J. Comput. Chem.*, 2011, **32**, 1456–1465.
- 38 F. Weigend and R. Ahlrichs, *Phys. Chem. Chem. Phys.*, 2005, **7**, 3297–3305.
- 39 B. Mennucci, E. Cancès and J. Tomasi, *J. Phys. Chem. B*, 1997, **101**, 10506–10517.
- 40 J. Tomasi, B. Mennucci and R. Cammi, *Chem. Rev.*, 2005, **105**, 2999–3093.
- 41 F. De Vleeschouwer, V. Van Speybroeck, M. Waroquier, P. Geerlings and F. De Proft, *Org. Lett.*, 2007, **9**, 2720–2724.
- 42 F. L. Hirshfeld, *Theor. Chim. Acta*, 1977, **44**, 129–138.
